# Supplementary material for: Genomic and transcriptomic plasticity in treatment-naïve ovarian cancer
Source: HighWire-hosted journal article supplement (doi:10.1101/gr.161026.113), 2013-11-12
Supplement: Supplemental_Table_6.xlsx [file Supplemental_Table_6.xlsx]

## Sheet: Upregulated_genes
Supplementary table 6. Upregulated genes. P1_I_II: samples p1.I-1, p1.I-2, p1.II-1, p1.II-2; P1_IV_V: samples p1.IV-1, p1.IV-2, p1.IV-3, p1.V-1; p2_I_II_VI: samples p2.I-1, p2.I-2,
p2.II-2, p2.IV-1, p2.IV-2, p2.IV-3; P2_V_VII: samples p2.V-1, p2.VII-1, p2.VII-2, p2.VII-3; P3_all: samples p3.I, p3.II, p3.III, p3.IV, p3.V, p3.VI, p3.VII.
Sample	Gene	norm.cov.test	norm.cov.ref	Log2 Fold	Log2 Fold change	Z-score	P-value
set	names			change	normalized
P1_I_II	CALML5	5511.84	29.8999	7.52625	7.79991	77.2001	0
P1_I_II	PDYN	738.52	5.2235	7.14348	7.41714	28.7146	2.50656e-181
P1_I_II	USH2A	7158.88	52.632	7.08765	7.36131	89.5913	0
P1_I_II	HTR3A	6500.61	48.2937	7.0726	7.34626	85.4209	0
P1_I_II	GLDC	11807.4	119.829	6.62257	6.89623	116.837	0
P1_I_II	LGALS14	252.529	2.62413	6.58846	6.86212	17.1028	1.41326e-65
P1_I_II	S100A7	1503.94	15.9368	6.56024	6.8339	41.7699	0
P1_I_II	SCGB1D1	527.595	5.60383	6.55688	6.83054	24.7421	3.76949e-135
P1_I_II	NLRP7	3117.07	34.0275	6.51735	6.79101	60.2025	0
P1_I_II	LY6G6C	7143.2	80.6392	6.46895	6.74261	91.2483	0
P1_I_II	AVPR1B	1870.58	21.1811	6.46457	6.73823	46.6996	0
P1_I_II	SPAG11B	200.334	2.43766	6.36077	6.63443	15.3204	5.58328e-53
P1_I_II	VGLL1	12063	148.077	6.3481	6.62176	118.918	0
P1_I_II	SFTPB	319.047	4.96643	6.00542	6.27908	19.4606	2.36999e-84
P1_I_II	KLK7	70287.4	1118.89	5.97313	6.24679	288.987	0
P1_I_II	REG1A	4274.72	68.3773	5.96617	6.23983	71.2713	0
P1_I_II	CLDN16	25598.3	429.236	5.89814	6.1718	174.555	0
P1_I_II	CYP4A11	1038.44	18.0399	5.84708	6.12074	35.1758	4.6909e-271
P1_I_II	ATP6V1C2	19630.1	345.104	5.82989	6.10355	152.965	0
P1_I_II	POU2F3	7111.66	125.436	5.82516	6.09882	92.0729	0
P1_I_II	SLC9A2	2664.21	47.0731	5.82266	6.09632	56.3559	0
P1_I_II	S100A7A	177.073	3.3036	5.74416	6.01782	14.5382	6.94138e-48
P1_I_II	BNIPL	11850.2	224.208	5.72392	5.99758	118.949	0
P1_I_II	OR7G2	157.088	3.22275	5.60714	5.8808	13.703	9.74715e-43
P1_I_II	CXCL17	59401.4	1223.66	5.60123	5.87489	266.482	0
P1_I_II	C1orf186	16111.1	354.892	5.50453	5.77819	138.8	0
P1_I_II	GJA8	111.634	2.47219	5.49684	5.7705	11.5536	7.07752e-31
P1_I_II	TMPRSS13	3785.01	86.6081	5.44965	5.72331	67.273	0
P1_I_II	KLRG2	1162.13	26.8971	5.43317	5.70683	37.2753	4.13024e-304
P1_I_II	LRRTM1	13076.7	310.406	5.3967	5.67036	125.028	0
P1_I_II	GRIK3	1454.45	37.0885	5.29335	5.56701	41.6766	0
P1_I_II	OXGR1	6075.76	156.894	5.2752	5.54886	85.1713	0
P1_I_II	C10orf99	607.419	16.129	5.23497	5.50863	26.9217	1.22329e-159
P1_I_II	UPK3B	7441.18	215.819	5.10764	5.3813	94.1041	0
P1_I_II	SLC9A4	1524.95	45.2882	5.07348	5.34714	42.5812	0
P1_I_II	ADCY8	25705.2	808.997	4.98978	5.26344	174.605	0
P1_I_II	CCDC64	21255.3	670.882	4.98562	5.25928	158.763	0
P1_I_II	SST	3091.35	98.2113	4.97621	5.24987	60.5358	0
P1_I_II	CTNNA2	14945.9	482.957	4.95171	5.22537	133.05	0
P1_I_II	KRT6A	4190.89	144.792	4.8552	5.12886	70.3188	0
P1_I_II	PALM3	4216.59	147.848	4.83389	5.10755	70.5009	0
P1_I_II	OR1M1	615.479	22.3451	4.78368	5.05734	26.9034	2.00507e-159
P1_I_II	HP	49013.6	1784.6	4.77951	5.05317	240.068	0
P1_I_II	TUBAL3	827.664	31.4908	4.71604	4.9897	31.1437	6.17582e-213
P1_I_II	CRABP1	6116.2	236.348	4.69365	4.96731	84.6093	0
P1_I_II	BSND	257.337	9.9819	4.6882	4.96186	17.3524	1.8922e-67
P1_I_II	EVPLL	100.727	4.02587	4.645	4.91866	10.8426	2.16223e-27
P1_I_II	DMBT1	9365.04	377.944	4.63104	4.9047	104.505	0
P1_I_II	APOA1	127494	5154.33	4.6285	4.90216	385.608	0
P1_I_II	SLC5A1	6770.24	278.183	4.6051	4.87876	88.7834	0
P1_I_II	SLC13A2	153.579	6.5471	4.55198	4.82564	13.3486	1.20671e-40
P1_I_II	GAL3ST3	953.102	40.6938	4.54975	4.82341	33.2512	1.96257e-242
P1_I_II	STRA8	927.659	39.6615	4.54778	4.82144	32.8022	5.48507e-236
P1_I_II	CAPN13	6386.66	274.662	4.53933	4.81299	86.0443	0
P1_I_II	ALDH3B2	10173.3	440.084	4.53087	4.80453	108.565	0
P1_I_II	KLK8	27087.7	1175.53	4.52625	4.79991	177.126	0
P1_I_II	CHI3L1	148034	6446.53	4.52126	4.79492	414.055	0
P1_I_II	C8orf73	3396.71	148.033	4.52015	4.7938	62.7079	0
P1_I_II	OVCH2	1033.94	45.2946	4.51267	4.78633	34.5879	3.83755e-262
P1_I_II	MUC16	308780	13785.9	4.48531	4.75897	597.331	0
P1_I_II	KLK13	2277.53	102.451	4.47446	4.74812	51.2629	0
P1_I_II	INSL4	105.634	4.77241	4.46821	4.74187	11.0375	2.51922e-28
P1_I_II	PGLYRP4	726.886	33.5416	4.4377	4.71136	28.9198	6.73256e-184
P1_I_II	LY6G6E	154.012	7.40621	4.37816	4.65182	13.2799	3.02671e-40
P1_I_II	PCP2	132.851	6.60309	4.33053	4.60419	12.3088	8.11809e-35
P1_I_II	CDKN2A	9377.5	470.642	4.3165	4.59016	103.351	0
P1_I_II	CLEC18B	194.618	10.0662	4.27306	4.54672	14.8592	6.06217e-50
P1_I_II	C20orf151	1175.8	61.2402	4.26302	4.53668	36.5062	8.85298e-292
P1_I_II	PI3	12779	675.689	4.24127	4.51493	120.227	0
P1_I_II	ICAM5	3119.14	166.021	4.23171	4.50537	59.37	0
P1_I_II	GPR110	3985.28	219.852	4.18008	4.45374	66.936	0
P1_I_II	PCP4	1976.8	115.175	4.10127	4.37493	46.9449	0
P1_I_II	ATP6V1B1	68411.6	4024.82	4.08725	4.36091	275.974	0
P1_I_II	COLEC10	115.564	6.88905	4.06825	4.34191	11.3295	9.37052e-30
P1_I_II	SHISA9	317.285	18.9598	4.06476	4.33842	18.7689	1.35672e-78
P1_I_II	FAM3D	368.767	22.0916	4.06114	4.3348	20.2302	5.30983e-91
P1_I_II	CP	62276.2	3758.57	4.05042	4.32408	262.754	0
P1_I_II	KRT6B	102.247	6.18128	4.04801	4.32167	10.6444	1.85215e-26
P1_I_II	TRIM71	851.55	51.7921	4.03929	4.31295	30.7029	5.21403e-207
P1_I_II	LIPK	123.229	7.51323	4.03576	4.30942	11.6772	1.66655e-31
P1_I_II	CKMT1A	549.621	33.6644	4.02914	4.3028	24.6516	3.53378e-134
P1_I_II	FOXQ1	1964.09	120.592	4.02565	4.29931	46.5915	0
P1_I_II	C6orf105	594.781	37.9189	3.97137	4.24503	25.5546	4.87675e-144
P1_I_II	SLC26A9	7267.69	464.329	3.96828	4.24194	89.3119	0
P1_I_II	AIM1L	2484.07	160.342	3.95348	4.22714	52.1659	0
P1_I_II	CPNE7	1921.19	124.952	3.94256	4.21621	45.8446	0
P1_I_II	LIME1	6288.15	421.73	3.89824	4.1719	82.7014	0
P1_I_II	KLK5	3082.98	211.056	3.86862	4.14228	57.7922	0
P1_I_II	C6orf223	586.673	40.2912	3.86402	4.13768	25.2025	3.75668e-140
P1_I_II	KIF5A	966.645	67.8904	3.83171	4.10537	32.278	1.4233e-228
P1_I_II	CSPG5	1962.8	140.372	3.80559	4.07925	45.9099	0
P1_I_II	KLK11	17530	1322.2	3.72881	4.00247	136.425	0
P1_I_II	CNGB1	694.901	53.0367	3.71174	3.9854	27.1258	4.88159e-162
P1_I_II	HPN	5085.31	395.001	3.68641	3.96007	73.2353	0
P1_I_II	TGM1	11426.9	889.697	3.68297	3.95663	109.752	0
P1_I_II	FRMD5	2123.11	169.267	3.64881	3.92247	47.1773	0
P1_I_II	AC021066.1	483.813	38.754	3.64203	3.91569	22.5083	3.44159e-112
P1_I_II	KRT86	483.813	38.754	3.64203	3.91569	22.5083	3.44159e-112
P1_I_II	AC020907.3	4336.06	349.727	3.63209	3.90575	67.3284	0
P1_I_II	CA9	1936.41	156.837	3.62605	3.89971	44.9708	0
P1_I_II	FUT3	984.928	80.2337	3.61774	3.8914	32.0503	2.1735e-225
P1_I_II	XDH	1714.16	139.892	3.61511	3.88877	42.2728	0
P1_I_II	ANO9	10542.8	863.563	3.60982	3.88348	104.791	0
P1_I_II	SAMD12	2261.34	185.672	3.60635	3.88001	48.5175	0
P1_I_II	ADM2	141.061	11.6248	3.60104	3.8747	12.1122	9.10482e-34
P1_I_II	TMEM63C	1333.35	110.952	3.58705	3.86071	37.194	8.52399e-303
P1_I_II	IL28RA	3380.09	281.356	3.58659	3.86025	59.2174	0
P1_I_II	TFAP2C	6966.33	582.11	3.58104	3.8547	84.9733	0
P1_I_II	SYNGR3	433.308	36.3808	3.57415	3.84781	21.1795	1.47492e-99
P1_I_II	SPOCK2	15648.5	1320.58	3.56678	3.84044	127.2	0
P1_I_II	DSC3	2338.43	197.828	3.56322	3.83688	49.1551	0
P1_I_II	ACPP	5707.9	488.128	3.54763	3.82129	76.6923	0
P1_I_II	ZBTB8B	453.475	38.8731	3.54418	3.81784	21.61	1.44762e-103
P1_I_II	PGLYRP3	110.183	9.45095	3.54329	3.81695	10.6512	1.72085e-26
P1_I_II	SNX31	208.043	17.9135	3.53776	3.81142	14.6287	1.84266e-48
P1_I_II	C9orf92	127.342	10.9952	3.53377	3.80743	11.4409	2.61059e-30
P1_I_II	RP11-817J15.3	180.362	15.586	3.53258	3.80624	13.6145	3.28509e-42
P1_I_II	AADAC	867.911	76.6661	3.50089	3.77455	29.7797	7.15074e-195
P1_I_II	MAST1	1095.37	97.428	3.49094	3.7646	33.4246	6.02233e-245
P1_I_II	CAPN8	1401.25	125.173	3.48473	3.75839	37.7828	0
P1_I_II	DSC2	18425.3	1647.92	3.48298	3.75664	136.989	0
P1_I_II	MT1B	355.416	31.9226	3.47686	3.75052	19.0145	1.29245e-80
P1_I_II	MYCL1	2006.15	181.896	3.46324	3.7369	45.1175	0
P1_I_II	RASAL1	3451.49	313.675	3.45988	3.73353	59.1602	0
P1_I_II	DAPL1	15357	1401.13	3.45423	3.72789	124.726	0
P1_I_II	PXDNL	1745.26	159.611	3.45081	3.72447	42.0322	0
P1_I_II	OTX1	136.086	12.4501	3.45029	3.72395	11.7364	8.29188e-32
P1_I_II	OTOG	485.774	44.4666	3.44949	3.72315	22.1724	6.33749e-109
P1_I_II	AQP9	8934	825.868	3.43532	3.70898	94.9589	0
P1_I_II	WNT7A	2132.14	197.217	3.43445	3.7081	46.3852	0
P1_I_II	OBP2B	433.855	40.1826	3.43257	3.70623	20.9201	3.5127e-97
P1_I_II	SLC4A11	9587.51	888.149	3.43228	3.70594	98.3419	0
P1_I_II	PRKCI	36899.9	3425.56	3.42921	3.70287	192.88	0
P1_I_II	SAMD10	1515.91	141.587	3.42042	3.69408	39.0586	0
P1_I_II	MACC1	3350.39	313.787	3.41647	3.69013	58.0447	0
P1_I_II	CYP3A7	238.677	22.4023	3.41334	3.687	15.4876	4.2066e-54
P1_I_II	FAM83A	4784.61	450.877	3.40759	3.68125	69.3044	0
P1_I_II	LYPD2	5705.59	539.003	3.40401	3.67767	75.6546	0
P1_I_II	CALHM3	130.048	12.3058	3.40164	3.6753	11.4191	3.3568e-30
P1_I_II	SLC6A11	775.452	74.2061	3.38543	3.65909	27.8393	1.45336e-170
P1_I_II	FOXB2	127.137	12.294	3.37035	3.64401	11.2553	2.18106e-29
P1_I_II	PLEKHN1	1158.92	112.983	3.35861	3.63227	33.9415	1.62689e-252
P1_I_II	PKP3	30176.5	2944.32	3.35742	3.63108	173.183	0
P1_I_II	GSDMC	2155.03	212.171	3.34441	3.61806	46.2166	0
P1_I_II	TRPV6	1731.69	171.129	3.33903	3.61269	41.4062	0
P1_I_II	KLK6	18259.6	1828.4	3.32	3.59366	134.192	0
P1_I_II	CR2	254.924	25.5863	3.31663	3.59029	15.8496	1.41392e-56
P1_I_II	MUC20	26836	2694	3.31635	3.59001	162.622	0
P1_I_II	GYLTL1B	7777.7	781.939	3.31422	3.58788	87.5255	0
P1_I_II	HCAR1	3496.32	354.504	3.30196	3.57562	58.6068	0
P1_I_II	TRIM17	5706.69	582.999	3.29109	3.56475	74.7879	0
P1_I_II	HIST1H3G	340.086	34.8858	3.28519	3.55885	18.2454	2.24925e-74
P1_I_II	AMN	779.852	80.1546	3.28234	3.556	27.6206	6.29304e-168
P1_I_II	FOLR3	1728.74	177.708	3.28214	3.5558	41.1228	0
P1_I_II	S100A14	3225.28	332.261	3.27903	3.55269	56.151	0
P1_I_II	KLHL35	3171.66	327.084	3.27751	3.55116	55.673	0
P1_I_II	C8orf85	334.43	34.58	3.2737	3.54736	18.0706	5.42858e-73
P1_I_II	SLC26A7	245.396	25.477	3.26784	3.5415	15.4695	5.56951e-54
P1_I_II	WISP3	2974.07	312.998	3.24822	3.52188	53.7384	0
P1_I_II	C1orf116	4610.69	489.418	3.23584	3.5095	66.8184	0
P1_I_II	CHODL	2996.09	318.084	3.2356	3.50926	53.8614	0
P1_I_II	CBS	11691.4	1241.46	3.23534	3.509	106.396	0
P1_I_II	LEMD1	2293.41	243.543	3.23525	3.50891	47.122	0
P1_I_II	MSLNL	718.272	76.4963	3.23107	3.50473	26.3586	4.0867e-153
P1_I_II	C1orf106	3613.81	386.766	3.22399	3.49765	59.0769	0
P1_I_II	DEFB1	11147.2	1194.47	3.22224	3.4959	103.738	0
P1_I_II	E2F2	562.625	60.5165	3.21677	3.49043	23.291	5.46769e-120
P1_I_II	PHACTR1	8174.44	892.819	3.19468	3.46834	88.5562	0
P1_I_II	LCN2	94139	10289.7	3.19359	3.46725	300.527	0
P1_I_II	CENPA	1397.64	152.801	3.19327	3.46693	36.6111	1.90499e-293
P1_I_II	C12orf56	1540.95	169.182	3.18718	3.46084	38.4153	0
P1_I_II	KIFC2	8405.43	943.094	3.15585	3.42951	89.3928	0
P1_I_II	TTK	2124.2	240.925	3.14026	3.41392	44.8549	0
P1_I_II	SMPDL3B	10181.7	1154.91	3.14013	3.41379	98.2024	0
P1_I_II	PCP4L1	177.755	20.2513	3.1338	3.40746	12.9654	1.92297e-38
P1_I_II	OVOL2	4566.92	523.682	3.12446	3.39812	65.6448	0
P1_I_II	KLK10	24012.1	2786.57	3.1072	3.38086	150.213	0
P1_I_II	GALNT14	6120.98	714.541	3.09867	3.37233	75.7587	0
P1_I_II	PRSS8	7726.94	909.811	3.08626	3.35992	84.9884	0
P1_I_II	SPP1	30683.9	3628.61	3.07999	3.35365	169.235	0
P1_I_II	ZYG11A	568.487	67.2391	3.07975	3.35341	23.0334	2.15565e-117
P1_I_II	ZBP1	2521	298.526	3.07807	3.35173	48.4948	0
P1_I_II	ABCA4	6366.9	754.955	3.07613	3.34979	77.0495	0
P1_I_II	CDCA8	1473.75	175.172	3.07265	3.34631	37.0531	1.60118e-300
P1_I_II	CBLC	3651.06	437.587	3.06067	3.33433	58.2329	0
P1_I_II	NEK2	2289.7	278.664	3.03856	3.31222	45.9856	0
P1_I_II	CELF5	277.193	34.034	3.02584	3.2995	15.9738	1.94587e-57
P1_I_II	CRABP2	41691.5	5122.34	3.02488	3.29854	195.893	0
P1_I_II	RP11-382J12.1	169.043	21.2386	2.99263	3.26629	12.42	2.03607e-35
P1_I_II	VSIG2	16950.4	2135.56	2.98864	3.2623	124.307	0
P1_I_II	XRCC2	1622.75	204.549	2.98792	3.26158	38.4571	0
P1_I_II	ESPL1	5167.33	652.943	2.98439	3.25805	68.5934	0
P1_I_II	PROM2	10164.8	1290.16	2.97796	3.25162	96.1235	0
P1_I_II	TM4SF4	595.358	75.5889	2.97751	3.25117	23.2613	1.09222e-119
P1_I_II	RSPH6A	257.945	32.758	2.97714	3.2508	15.3105	6.51077e-53
P1_I_II	C2orf88	11482.7	1464.99	2.9705	3.24415	102.062	0
P1_I_II	EFCAB4A	4026.04	516.696	2.96197	3.23563	60.3637	0
P1_I_II	TMPRSS4	3074.16	398.152	2.9488	3.22246	52.6525	0
P1_I_II	SRCRB4D	1359.97	176.138	2.9488	3.22246	35.0203	1.10326e-268
P1_I_II	AC010336.1	3149.95	408.735	2.94609	3.21975	53.2778	0
P1_I_II	FAM54A	760.706	98.8972	2.94334	3.217	26.172	5.53565e-151
P1_I_II	KRT7	51809.6	6758.53	2.93844	3.2121	215.865	0
P1_I_II	MAL	7308.17	960.503	2.92765	3.20131	80.9461	0
P1_I_II	CGN	26543.9	3544.46	2.90474	3.1784	153.778	0
P1_I_II	LAD1	12695.9	1698.11	2.90236	3.17602	106.313	0
P1_I_II	PTGS1	41048.9	5490.51	2.90233	3.17599	191.173	0
P1_I_II	CTCFL	604.106	81.7455	2.88559	3.15925	23.1347	2.07212e-118
P1_I_II	FAM83H	7809.74	1057.46	2.88466	3.15832	83.1715	0
P1_I_II	CDC20	6247.94	846.021	2.88462	3.15828	74.391	0
P1_I_II	KLK12	123.291	16.7006	2.8841	3.15776	10.4492	1.47841e-25
P1_I_II	PVRL4	4379.46	602.35	2.86208	3.13574	62.0793	0
P1_I_II	RP5-862P8.2	3522.14	484.538	2.86177	3.13543	55.6697	0
P1_I_II	KSR2	336.425	46.3062	2.86101	3.13467	17.2032	2.51272e-66
P1_I_II	CAPN9	2227.68	307.697	2.85596	3.12962	44.2357	0
P1_I_II	RP5-1187M17.10	5180.53	717.703	2.85164	3.1253	67.4158	0
P1_I_II	MTAP	12670.9	1758.17	2.84937	3.12303	105.4	0
P1_I_II	HPDL	531.508	74.3517	2.83765	3.11131	21.5491	5.3938e-103
P1_I_II	IGSF9	8923.69	1256.71	2.82798	3.10164	88.1719	0
P1_I_II	RP11-631B21.2	269.026	37.9121	2.82702	3.10067	15.3068	6.88499e-53
P1_I_II	GJB3	1340.28	189.634	2.82124	3.0949	34.1359	2.16717e-255
P1_I_II	ROPN1B	245.729	34.9539	2.81354	3.0872	14.5995	2.82754e-48
P1_I_II	SNTB1	8283.2	1179.96	2.81145	3.08511	84.7383	0
P1_I_II	NMU	1084.97	154.819	2.80901	3.08267	30.6566	2.15882e-206
P1_I_II	RAB26	599.787	85.6808	2.80741	3.08107	22.7881	6.02316e-115
P1_I_II	VPREB3	284.43	40.8654	2.79912	3.07278	15.6729	2.31621e-55
P1_I_II	ERBB3	37513.9	5403.59	2.79544	3.0691	179.906	0
P1_I_II	STX19	824.325	120.562	2.77344	3.0471	26.5767	1.26375e-155
P1_I_II	LY6G6F	489.953	71.8765	2.76905	3.04271	20.4754	3.5697e-93
P1_I_II	XXbac-BPG32J3.19	489.953	71.8765	2.76905	3.04271	20.4754	3.5697e-93
P1_I_II	EPHA1	14635	2150.09	2.76696	3.04062	111.872	0
P1_I_II	IKBKE	6251.26	923.012	2.75973	3.03339	73.0319	0
P1_I_II	SVOPL	2167.17	320.35	2.75809	3.03175	42.9892	0
P1_I_II	SLC6A12	5356.15	793.224	2.7554	3.02906	67.5553	0
P1_I_II	C9orf100	895.771	132.702	2.75493	3.02859	27.6246	5.63124e-168
P1_I_II	TRIM46	2830.78	419.365	2.75492	3.02858	49.1079	0
P1_I_II	CEP55	2307.72	342.03	2.75428	3.02793	44.3349	0
P1_I_II	KIF14	1013.74	150.39	2.7529	3.02656	29.378	1.04918e-189
P1_I_II	MTL5	1641.22	243.83	2.75083	3.02449	37.3682	1.28352e-305
P1_I_II	GRAMD2	5363.14	797.951	2.74871	3.02237	67.5283	0
P1_I_II	LACTB2	10889	1622.92	2.74621	3.01986	96.1842	0
P1_I_II	ISM2	472.482	70.5147	2.74426	3.01792	20.0291	3.07405e-89
P1_I_II	SLC6A13	1957.29	294.218	2.7339	3.00756	40.6989	0
P1_I_II	GRHL1	3908.63	593.584	2.71914	2.9928	57.3777	0
P1_I_II	RIMKLA	735.3	111.694	2.71878	2.99243	24.8848	1.08556e-136
P1_I_II	PDZK1IP1	10485.8	1595.05	2.71677	2.99043	93.9447	0
P1_I_II	MAP3K9	2060.79	313.926	2.7147	2.98836	41.6328	0
P1_I_II	TRAV30	290.099	44.2865	2.71161	2.98527	15.6125	5.98009e-55
P1_I_II	CYP2S1	5506.06	843.965	2.70577	2.97943	67.9539	0
P1_I_II	C1orf147	1253.53	192.674	2.70177	2.97543	32.4023	2.55122e-230
P1_I_II	FAM26D	120.82	18.5888	2.70036	2.97402	10.0572	8.54014e-24
P1_I_II	CCL28	3151.95	485.461	2.69882	2.97248	51.3559	0
P1_I_II	ATHL1	24181.9	3737.4	2.69382	2.96748	142.138	0
P1_I_II	MYO3B	1905.33	297.864	2.67732	2.95098	39.7879	0
P1_I_II	C7orf13	299.972	46.9063	2.67697	2.95063	15.7863	3.86881e-56
P1_I_II	ESRRG	1956.41	308.535	2.6647	2.93836	40.2331	0
P1_I_II	CRB2	2608.62	411.744	2.66347	2.93713	46.4483	0
P1_I_II	ASPM	3673.48	580.459	2.66188	2.93554	55.1048	0
P1_I_II	S100A9	114660	18223	2.65354	2.9272	307.502	0
P1_I_II	PARD6B	5558.74	885.446	2.65028	2.92394	67.654	0
P1_I_II	AC074091.13	457.386	73.0913	2.64564	2.9193	19.3911	9.17719e-84
P1_I_II	BHLHE41	20417.8	3273.81	2.64078	2.91444	129.457	0
P1_I_II	PSAT1	12127.6	1950.72	2.63622	2.90988	99.6926	0
P1_I_II	DLGAP5	2587.17	416.559	2.63478	2.90844	46.0335	0
P1_I_II	MUC4	11187.7	1814.52	2.62426	2.89792	95.556	0
P1_I_II	CLDN22	719.265	116.91	2.62113	2.89479	24.2152	1.53883e-129
P1_I_II	ARHGEF35	545.495	89.0937	2.61417	2.88783	21.0628	1.74386e-98
P1_I_II	S100A2	1756.73	290.176	2.59789	2.87155	37.6917	0
P1_I_II	VNN1	2300.25	381.008	2.5939	2.86756	43.1	0
P1_I_II	TRIM58	1721.7	285.644	2.59155	2.86521	37.2725	4.5737e-304
P1_I_II	PTGES	1077.06	178.745	2.59112	2.86478	29.4779	5.53296e-191
P1_I_II	MUC1	145202	24114.1	2.59011	2.86377	342.308	0
P1_I_II	C11orf82	1469.21	244.29	2.58837	2.86203	34.4119	1.67643e-259
P1_I_II	SORCS1	1976.59	328.695	2.58819	2.86185	39.9127	0
P1_I_II	RNF207	5418.43	901.494	2.58749	2.86114	66.0754	0
P1_I_II	ESRP1	18655.2	3121.74	2.57916	2.85282	122.426	0
P1_I_II	HIST1H3F	115.776	19.3999	2.57721	2.85087	9.64092	5.37059e-22
P1_I_II	PIWIL1	231.987	38.8874	2.57666	2.85032	13.6458	2.13928e-42
P1_I_II	EPN3	6629.44	1118.14	2.56779	2.84145	72.8324	0
P1_I_II	ARHGAP40	493.046	83.5651	2.56075	2.83441	19.837	1.42641e-87
P1_I_II	SLC17A9	3538.58	601.691	2.55608	2.82974	53.0989	0
P1_I_II	SRMS	165.817	28.2478	2.55338	2.82704	11.4887	1.50364e-30
P1_I_II	CXCL10	2944.69	503.154	2.54904	2.8227	48.377	0
P1_I_II	AC108134.1	147.391	25.1864	2.54893	2.82259	10.8229	2.6821e-27
P1_I_II	PKD1L2	5331.67	911.389	2.54845	2.82211	65.0888	0
P1_I_II	HIST1H3C	178.661	30.7371	2.53917	2.81283	11.8947	1.26137e-32
P1_I_II	DEPDC1B	1100.43	189.419	2.53841	2.81207	29.5161	1.78748e-191
P1_I_II	DEPDC1	741.979	127.725	2.53834	2.81199	24.2364	9.2021e-130
P1_I_II	OXTR	1242.37	214.725	2.53253	2.80619	31.3283	1.92324e-215
P1_I_II	ALS2CL	12105.2	2100.59	2.52676	2.80042	97.6897	0
P1_I_II	TMEM139	6443.95	1118.81	2.52598	2.79964	71.2642	0
P1_I_II	EVPL	5859.45	1020.45	2.52157	2.79523	67.9	0
P1_I_II	KRT8P11	537.433	93.6053	2.52142	2.79508	20.563	5.88563e-94
P1_I_II	CXCL11	580.875	101.333	2.51912	2.79278	21.3688	2.60476e-101
P1_I_II	RDM1	326.73	57.1676	2.51483	2.78849	16.0136	1.02675e-57
P1_I_II	RUFY4	404.17	70.7736	2.51368	2.78734	17.8068	6.26329e-71
P1_I_II	CCNB2	5911.84	1035.31	2.51354	2.7872	68.1016	0
P1_I_II	GRHL3	6932.59	1221	2.50533	2.77899	73.6346	0
P1_I_II	RTP4	15161.2	2679.5	2.50035	2.77401	108.794	0
P1_I_II	BUB1	3700.99	654.852	2.49867	2.77233	53.734	0
P1_I_II	FAM111B	609.289	108.628	2.48773	2.76139	21.7573	5.89177e-105
P1_I_II	STON2	9071.77	1617.7	2.48744	2.7611	83.9506	0
P1_I_II	MELK	2760.72	493.575	2.4837	2.75736	46.2781	0
P1_I_II	ZNF695	826.555	148.051	2.48101	2.75467	25.3091	2.53416e-141
P1_I_II	AC009403.2	925.733	166.251	2.47723	2.75089	26.7653	8.19031e-158
P1_I_II	FAM203A	209.316	37.8211	2.46842	2.74208	12.7058	5.49378e-37
P1_I_II	ANXA8L2	173.895	31.6568	2.45763	2.73129	11.5569	6.80912e-31
P1_I_II	ZNF217	33766.2	6156.31	2.45544	2.7291	160.986	0
P1_I_II	OASL	6341.38	1157.63	2.45362	2.72728	69.7365	0
P1_I_II	ANPEP	13503.2	2472.34	2.44936	2.72302	101.68	0
P1_I_II	CHMP4C	4908.35	901.076	2.44552	2.71918	61.2565	0
P1_I_II	BACE2	53812.2	9879.42	2.44543	2.71909	202.845	0
P1_I_II	ATAD2	9074.15	1666.56	2.44489	2.71855	83.2795	0
P1_I_II	ESPN	6477.37	1190.5	2.44385	2.71751	70.3467	0
P1_I_II	SH2D3A	4139.17	762.905	2.43977	2.71343	56.1893	0
P1_I_II	CYP4Z1	246.126	45.3754	2.43942	2.71308	13.7007	1.00554e-42
P1_I_II	RSPO1	4779.89	881.219	2.4394	2.71306	60.3776	0
P1_I_II	CARD9	1979.07	365.713	2.43604	2.7097	38.8247	0
P1_I_II	PRSS50	940.183	173.813	2.43541	2.70907	26.7565	1.03624e-157
P1_I_II	ABHD11	16512.3	3056.81	2.43344	2.7071	112.092	0
P1_I_II	RHPN1	7199.95	1335.97	2.4301	2.70376	73.9677	0
P1_I_II	CLEC5A	271.907	50.5071	2.42856	2.70222	14.3698	8.01087e-47
P1_I_II	ESRP2	8143.91	1513.88	2.42747	2.70113	78.6267	0
P1_I_II	ENHO	416.511	77.9331	2.41805	2.69171	17.7481	1.78378e-70
P1_I_II	HEATR7A	6354.43	1189.18	2.41779	2.69145	69.3202	0
P1_I_II	CLDN3	12588.4	2358.66	2.41606	2.68972	97.5357	0
P1_I_II	EDARADD	411.593	77.4848	2.40923	2.68289	17.6121	1.98984e-69
P1_I_II	LAMP3	2883.86	544.172	2.40586	2.67952	46.5879	0
P1_I_II	ANXA3	11262.3	2128.57	2.40354	2.6772	92.0249	0
P1_I_II	NCEH1	5267.56	995.715	2.40333	2.67699	62.9323	0
P1_I_II	ARHGAP4	16764.6	3175.72	2.40027	2.67393	112.204	0
P1_I_II	MST1R	3827.69	725.123	2.40017	2.67383	53.6119	0
P1_I_II	TRPS1	10407.5	1978.46	2.39518	2.66884	88.3156	0
P1_I_II	CCNE1	2836.97	539.897	2.3936	2.66725	46.094	0
P1_I_II	NCAPH	2128.14	406.374	2.38871	2.66237	39.883	0
P1_I_II	FCRLB	307.901	58.8019	2.38853	2.66219	15.1697	5.61752e-52
P1_I_II	RAP1GAP	6087.28	1164.18	2.38649	2.66015	67.423	0
P1_I_II	SLC2A12	4109.54	788.299	2.38216	2.65582	55.349	0
P1_I_II	SIX4	5003.78	959.931	2.38201	2.65567	61.0731	0
P1_I_II	PDE11A	301.003	57.9009	2.37812	2.65178	14.9671	1.20502e-50
P1_I_II	ZNF556	2351.35	456.389	2.36515	2.63881	41.7215	0
P1_I_II	IL17RE	4659.14	908.829	2.35798	2.63164	58.6428	0
P1_I_II	TMEM238	946.523	185.223	2.35337	2.62703	26.4064	1.15805e-153
P1_I_II	CDCA3	2561.39	502.293	2.35033	2.62399	43.4118	0
P1_I_II	ELMO3	11966.6	2346.82	2.35024	2.6239	93.8335	0
P1_I_II	TPRG1	2388.77	469.168	2.34809	2.62175	41.904	0
P1_I_II	NPW	106.092	20.8672	2.34601	2.61967	8.82712	1.07408e-18
P1_I_II	SLC9A11	1327.21	261.37	2.34423	2.61789	31.2095	7.92709e-214
P1_I_II	ORC6	1571.88	309.613	2.34395	2.61761	33.9627	7.92714e-253
P1_I_II	SCGB1D2	10259.2	2030.96	2.33669	2.61035	86.6361	0
P1_I_II	SQLE	17913.8	3556.01	2.33274	2.6064	114.388	0
P1_I_II	RAD51AP1	1462.25	290.887	2.32966	2.60332	32.6589	5.98474e-234
P1_I_II	KIF2C	3603.2	717.075	2.32908	2.60274	51.2606	0
P1_I_II	TMPRSS3	16842	3363.69	2.32395	2.59761	110.708	0
P1_I_II	MMP20	146.11	29.2775	2.31919	2.59285	10.3007	6.99561e-25
P1_I_II	C2	27982	5611.46	2.31805	2.59171	142.524	0
P1_I_II	KIF20A	5807.71	1169.68	2.31185	2.58551	64.842	0
P1_I_II	KCTD14	6723.29	1355	2.31087	2.58453	69.7517	0
P1_I_II	FAM84B	1967.79	397.044	2.30921	2.58287	37.7219	0
P1_I_II	CDCA5	1009.92	204.378	2.30493	2.57859	26.9991	1.51379e-160
P1_I_II	ZP3	1990.28	403.271	2.30315	2.57681	37.8877	0
P1_I_II	ELF3	75008.1	15240.3	2.29916	2.57282	232.432	0
P1_I_II	TBC1D2	7328.46	1489.79	2.2984	2.57206	72.6287	0
P1_I_II	FRK	1963.88	401.267	2.29107	2.56473	37.5376	0
P1_I_II	SPC24	966.338	198.445	2.28379	2.55745	26.2897	2.51256e-152
P1_I_II	SULT1C2	1188.72	244.594	2.28095	2.55461	29.1402	1.11282e-186
P1_I_II	PLK1	4406.33	907.79	2.27915	2.55281	56.082	0
P1_I_II	HIST1H2BH	416.663	85.9611	2.27713	2.55079	17.2378	1.38191e-66
P1_I_II	ZNF503-AS2	1205.23	248.856	2.27593	2.54959	29.3097	7.79853e-189
P1_I_II	CDKN2B	148.08	30.5803	2.2757	2.54936	10.2731	9.31652e-25
P1_I_II	IFIT2	10059.9	2081.94	2.27262	2.54628	84.6189	0
P1_I_II	CATSPERB	447.34	92.6071	2.27218	2.54584	17.8417	3.35147e-71
P1_I_II	RGL3	6235.41	1290.94	2.27206	2.54572	66.611	0
P1_I_II	AQP5	1043.1	216.189	2.27051	2.54417	27.2347	2.52505e-163
P1_I_II	VTCN1	18788	3901.84	2.26759	2.54125	115.515	0
P1_I_II	BCAM	118182	24545.4	2.26748	2.54114	289.777	0
P1_I_II	CEACAM6	742.014	155.372	2.25572	2.52938	22.8953	5.17457e-116
P1_I_II	OGDHL	3309.92	693.306	2.25523	2.52889	48.351	0
P1_I_II	EXO1	1155.37	242.02	2.25515	2.52881	28.5658	1.78848e-179
P1_I_II	ASF1B	1835.62	385.088	2.25301	2.52666	35.9891	1.23933e-283
P1_I_II	TM7SF4	111.768	23.5165	2.24876	2.52242	8.87207	7.17982e-19
P1_I_II	NUAK2	9493.84	1999.94	2.24703	2.52069	81.7391	0
P1_I_II	TSPAN12	7823.09	1648.11	2.24693	2.52059	74.197	0
P1_I_II	GPR19	373.343	78.7616	2.24494	2.5186	16.2013	4.9352e-59
P1_I_II	ZNF250	8244.03	1742.8	2.24194	2.5156	76.0822	0
P1_I_II	EPCAM	41361.1	8766.9	2.23814	2.5118	170.283	0
P1_I_II	TRIM59	1820.89	386.427	2.23637	2.51003	35.7112	2.64984e-279
P1_I_II	CDK18	7991.41	1698.55	2.23415	2.50781	74.7762	0
P1_I_II	SLPI	304354	64839.9	2.2308	2.50446	461.443	0
P1_I_II	STAC2	237.936	50.7405	2.22936	2.50302	12.8886	5.22108e-38
P1_I_II	DTX4	5920.75	1267.43	2.22388	2.49754	64.2138	0
P1_I_II	RAD21	38891.1	8330.9	2.22289	2.49655	164.552	0
P1_I_II	MESP2	118.897	25.4999	2.22116	2.49482	9.09394	9.55174e-20
P1_I_II	PPP1R13L	3270.86	701.817	2.2205	2.49416	47.6909	0
P1_I_II	POLQ	1041.06	224.423	2.21377	2.48743	26.8641	5.76664e-159
P1_I_II	PBK	1598.83	344.92	2.21268	2.48634	33.2834	6.71101e-243
P1_I_II	SLC15A1	600.212	129.543	2.21204	2.4857	20.3899	2.05644e-92
P1_I_II	NDST3	228.675	49.3702	2.21159	2.48525	12.5842	2.57878e-36
P1_I_II	DLX3	131.139	28.3262	2.21088	2.48454	9.52822	1.59995e-21
P1_I_II	GATA3	769.613	166.514	2.20849	2.48215	23.0699	9.29166e-118
P1_I_II	KCNC3	5156.29	1116.01	2.20799	2.48165	59.708	0
P1_I_II	IFI6	67467.3	14611.1	2.20712	2.48078	215.967	0
P1_I_II	ZNF488	211.22	45.8018	2.20527	2.47893	12.0769	1.39948e-33
P1_I_II	EPPK1	15926.7	3453.88	2.20515	2.47881	104.871	0
P1_I_II	PTK6	523.522	113.556	2.20485	2.47851	19.0113	1.37403e-80
P1_I_II	U47924.25	2580.62	559.956	2.20433	2.47799	42.2043	0
P1_I_II	WFDC8	103.764	22.5272	2.20356	2.47722	8.46133	2.64356e-17
P1_I_II	IFIT1	40684.4	8839.03	2.20251	2.47617	167.52	0
P1_I_II	DPEP3	795.173	172.964	2.2008	2.47446	23.4083	3.5145e-121
P1_I_II	PSCA	445.66	97.2958	2.19549	2.46915	17.5028	1.36302e-68
P1_I_II	C20orf11	25035.4	5473.41	2.19346	2.46712	131.131	0
P1_I_II	MTBP	3041.27	665.646	2.19185	2.46551	45.6846	0
P1_I_II	ST6GALNAC1	8946.39	1959.94	2.1905	2.46416	78.3314	0
P1_I_II	DSCC1	2074.04	457.157	2.18168	2.45534	37.6375	0
P1_I_II	CEP72	2126.9	470.334	2.177	2.45066	38.0723	0
P1_I_II	CYP2F1	148.905	32.9968	2.174	2.44766	10.0666	7.76374e-24
P1_I_II	SCGB2A1	35905.7	7958.73	2.1736	2.44726	156.317	0
P1_I_II	SPON1	74131.2	16518.3	2.16601	2.43967	224.226	0
P1_I_II	PRSS33	101.109	22.5626	2.1639	2.43756	8.27533	1.28102e-16
P1_I_II	TPX2	5500.73	1233.16	2.15727	2.43093	60.9429	0
P1_I_II	TMEM79	2342.47	525.623	2.15593	2.42959	39.7566	0
P1_I_II	TATDN1	9153.84	2057.15	2.15373	2.42739	78.551	0
P1_I_II	PGA4	172.751	38.8788	2.15164	2.4253	10.7854	4.03633e-27
P1_I_II	PGA5	172.751	38.8788	2.15164	2.4253	10.7854	4.03633e-27
P1_I_II	ST14	39592.8	8935.36	2.14764	2.4213	163.139	0
P1_I_II	CKAP2L	1167.46	263.793	2.1459	2.41956	27.9994	1.651e-172
P1_I_II	ZNF512B	14386.9	3251.71	2.14549	2.41915	98.2842	0
P1_I_II	KRT8	92519	20981	2.14067	2.41433	248.997	0
P1_I_II	GPR137C	732.024	166.626	2.13528	2.40894	22.1146	2.28723e-108
P1_I_II	GINS1	849.825	193.948	2.13149	2.40515	23.8058	2.90781e-125
P1_I_II	BUB1B	2552.97	583.353	2.12974	2.4034	41.2438	0
P1_I_II	MFSD3	4307.69	986.444	2.12661	2.40027	53.5339	0
P1_I_II	SLC7A11	971.707	222.562	2.12632	2.39997	25.4238	1.37754e-142
P1_I_II	CCNA1	12637.3	2896.67	2.12522	2.39888	91.6632	0
P1_I_II	OR2W3	480.404	110.122	2.12514	2.3988	17.8711	1.9811e-71
P1_I_II	SFTPD	501.034	115.086	2.1222	2.39586	18.2377	2.59234e-74
P1_I_II	CHAC2	683.674	157.316	2.11965	2.39331	21.2907	1.3847e-100
P1_I_II	CXADR	4104.43	944.846	2.11903	2.39269	52.1591	0
P1_I_II	TPMT	3386.65	779.844	2.1186	2.39226	47.3742	0
P1_I_II	MTSS1	10066.2	2320.02	2.11731	2.39096	81.6505	0
P1_I_II	CDK1	5103.24	1178.29	2.11472	2.38838	58.099	0
P1_I_II	KLC3	831.976	192.128	2.11447	2.38813	23.4569	1.12435e-121
P1_I_II	MTHFD2	12678.4	2927.88	2.11444	2.3881	91.5705	0
P1_I_II	SLC15A2	5221.72	1207.97	2.11194	2.38559	58.7294	0
P1_I_II	ZNF595	1279.15	296.272	2.11019	2.38385	29.0548	1.33814e-185
P1_I_II	AC008537.3	425.912	98.6593	2.11003	2.38369	16.7649	4.40937e-63
P1_I_II	FOXM1	6744.4	1563.26	2.10913	2.38279	66.6995	0
P1_I_II	MX1	48283.8	11200.2	2.10802	2.38167	178.434	0
P1_I_II	FGFR3	1882.44	437.254	2.10606	2.37972	35.2109	1.36311e-271
P1_I_II	MLXIPL	11611.3	2698.83	2.10513	2.37878	87.4314	0
P1_I_II	NUF2	1129.2	262.6	2.10436	2.37802	27.2595	1.28128e-163
P1_I_II	ZNF572	956.506	222.547	2.10366	2.37732	25.0843	7.37463e-139
P1_I_II	CENPF	4311.92	1003.76	2.10291	2.37657	53.2496	0
P1_I_II	ARHGEF16	3458.65	805.669	2.10195	2.37561	47.6794	0
P1_I_II	PRSS1	558.102	130.113	2.10077	2.37443	19.1471	1.0231e-81
P1_I_II	PSORS1C2	406.668	94.8783	2.0997	2.37336	16.34	5.12536e-60
P1_I_II	TNFSF10	18120.4	4229.91	2.09892	2.37257	109.056	0
P1_I_II	TNFAIP8	3058.92	715.437	2.09613	2.36979	44.7747	0
P1_I_II	TSSK1B	125.441	29.3839	2.09391	2.36757	9.06203	1.28041e-19
P1_I_II	ZMYND8	27159.2	6375.14	2.09091	2.36457	133.251	0
P1_I_II	INCENP	4720.32	1109.44	2.08905	2.36271	55.5226	0
P1_I_II	AURKA	3586.73	843.924	2.08748	2.36114	48.3796	0
P1_I_II	SERPINB2	1717.05	404.245	2.08663	2.36029	33.4665	1.48347e-245
P1_I_II	ANKRD7	316.255	74.5169	2.08545	2.35911	14.3584	9.43138e-47
P1_I_II	LSR	22562.2	5330.62	2.08153	2.35519	121.165	0
P1_I_II	TFPI2	15868.1	3754.58	2.07941	2.35307	101.557	0
P1_I_II	CIT	2986.95	707.468	2.07794	2.3516	44.0439	0
P1_I_II	LAPTM4B	71827.9	17023.4	2.07702	2.35068	215.97	0
P1_I_II	HIST1H3B	138.426	32.8406	2.07556	2.34922	9.47583	2.64656e-21
P1_I_II	SIPA1L1	35631.6	8462.75	2.07396	2.34762	151.981	0
P1_I_II	KRTCAP3	12414	2953.56	2.07144	2.3451	89.6447	0
P1_I_II	RAB25	10090.4	2403.44	2.06981	2.34347	80.7869	0
P1_I_II	BBOX1	5481.47	1305.88	2.06954	2.3432	59.539	0
P1_I_II	NMNAT2	1124.37	268.008	2.06876	2.34242	26.9598	4.38395e-160
P1_I_II	GPR37	1465.08	349.614	2.06714	2.3408	30.762	8.44779e-208
P1_I_II	SLC28A3	4269.45	1019.62	2.06602	2.33968	52.4987	0
P1_I_II	ZNF323	3846.12	919.736	2.06411	2.33777	49.8039	0
P1_I_II	EPHX4	1093.61	262.247	2.0601	2.33376	26.5299	4.38001e-155
P1_I_II	CDC42BPG	6085.76	1464.46	2.05507	2.32873	62.5042	0
P1_I_II	CYP8B1	3810.54	917.284	2.05456	2.32822	49.4522	0
P1_I_II	TNFRSF8	537.226	129.458	2.05304	2.3267	18.5609	6.65932e-77
P1_I_II	ECE2	3737.17	901.533	2.05149	2.32515	48.9353	0
P1_I_II	MSLN	64834.4	15650.6	2.05054	2.3242	203.805	0
P1_I_II	INADL	19704.1	4772.15	2.04579	2.31945	112.204	0
P1_I_II	CPB1	1298.06	315.619	2.0401	2.31376	28.7554	7.7441e-182
P1_I_II	ICAM4	1233.45	300.311	2.03817	2.31183	28.0166	1.01922e-172
P1_I_II	EPS8L1	8673.28	2111.85	2.03807	2.31173	74.2924	0
P1_I_II	CACNG4	1716.8	418.867	2.03516	2.30882	33.0275	3.27129e-239
P1_I_II	CXCR4	47299.5	11598.3	2.02791	2.30157	173.051	0
P1_I_II	RASSF7	5922.8	1452.43	2.02782	2.30147	61.2285	0
P1_I_II	HOXB4	3721.94	913.259	2.02696	2.30062	48.526	0
P1_I_II	CFB	177353	43526.7	2.02666	2.30032	335.095	0
P1_I_II	XXbac-BPG116M5.17	177353	43526.7	2.02666	2.30032	335.095	0
P1_I_II	RAB19	1038.96	255.156	2.02568	2.29934	25.6296	7.14538e-145
P1_I_II	BRCC3	2417.08	596.472	2.01874	2.2924	39.021	0
P1_I_II	UBE2T	5252.2	1298.65	2.01591	2.28957	57.4782	0
P1_I_II	KCTD19	487.741	120.757	2.01401	2.28767	17.5067	1.2731e-68
P1_I_II	ABCC4	13150.9	3256.35	2.01383	2.28749	90.9037	0
P1_I_II	MCOLN3	1406.67	349.211	2.01011	2.28377	29.7002	7.62488e-194
P1_I_II	OAS1	21509.5	5344.4	2.00887	2.28253	116.107	0
P1_I_II	SUSD3	8136.97	2022.27	2.00852	2.28218	71.4035	0
P1_I_II	VAV3	2311.09	576.698	2.00268	2.27634	37.9942	0
P1_I_II	FAM90A1	199.542	49.7983	2.00253	2.27619	11.1636	6.14173e-29
P1_I_II	PAX8	19088.6	4764.74	2.00224	2.2759	109.185	0
P1_I_II	DSP	39473.2	9858.91	2.00137	2.27503	156.982	0
P1_I_II	TSTA3	27609.2	6896.06	2.0013	2.27496	131.282	0
P1_I_II	TEC	1449.6	362.17	2.00092	2.27458	30.0765	9.82345e-199
P1_I_II	GPR56	27892.4	7007.52	1.9929	2.26656	131.658	0
P1_I_II	ARHGAP11B	256.899	64.6158	1.99124	2.2649	12.6288	1.46581e-36
P1_I_II	CCBP2	3520.12	886.427	1.98955	2.26321	46.7266	0
P1_I_II	DCAF13	17256.2	4354.29	1.98661	2.26027	103.379	0
P1_I_II	ZBED2	1891.76	477.745	1.98542	2.25908	34.2164	1.37927e-256
P1_I_II	C19orf46	2496.77	630.768	1.98488	2.25854	39.3032	0
P1_I_II	POLR3G	287.218	72.6392	1.98332	2.25698	13.3248	1.66122e-40
P1_I_II	GPR172A	8330.33	2108.26	1.98232	2.25598	71.7425	0
P1_I_II	RHBDL2	1753.49	443.78	1.98231	2.25597	32.9146	1.35736e-237
P1_I_II	TNF	677.111	171.393	1.98209	2.25575	20.4522	5.74244e-93
P1_I_II	S100A8	43117.6	10916.5	1.98177	2.25543	163.21	0
P1_I_II	MCM10	970.56	245.874	1.9809	2.25456	24.4784	2.51201e-132
P1_I_II	ATP6V1C1	9953.82	2521.74	1.98083	2.25449	78.3913	0
P1_I_II	TFB2M	7495.6	1899.21	1.98065	2.25431	68.0223	0
P1_I_II	FRMPD1	1547.4	392.321	1.97974	2.2534	30.8984	1.25348e-209
P1_I_II	CAMSAP3	4481.35	1136.72	1.97905	2.25271	52.573	0
P1_I_II	CRB3	1708.01	433.72	1.97748	2.25114	32.4425	6.90282e-231
P1_I_II	EPS8L2	13514.2	3431.77	1.97745	2.25111	91.259	0
P1_I_II	PUSL1	1950.57	495.549	1.9768	2.25046	34.6633	2.81243e-263
P1_I_II	HOOK1	2025.35	515.445	1.97428	2.24794	35.2974	6.42935e-273
P1_I_II	TC2N	10160.9	2586.54	1.97393	2.24759	79.0547	0
P1_I_II	C11orf9	9510.45	2421.4	1.97367	2.24733	76.4769	0
P1_I_II	SLC50A1	29107.9	7411.03	1.97366	2.24732	133.8	0
P1_I_II	PLXNA3	20290.7	5166.4	1.97359	2.24725	111.707	0
P1_I_II	CCNA2	2489.59	634.743	1.97166	2.24532	39.1065	0
P1_I_II	C12orf48	1514.87	386.303	1.97139	2.24504	30.5027	2.40096e-204
P1_I_II	PITX1	2299.18	587.518	1.96842	2.24208	37.548	0
P1_I_II	DHCR7	12428.5	3182.29	1.96551	2.23917	87.2322	0
P1_I_II	SERPINB10	1209.8	310.362	1.96275	2.23641	27.1946	7.51839e-163
P1_I_II	SEMA5B	5083.26	1305.06	1.96163	2.23529	55.7275	0
P1_I_II	ARHGEF5	1542.12	396.874	1.95817	2.23183	30.6648	1.67552e-206
P1_I_II	CYP3A5	2573.85	663.768	1.95518	2.22884	39.5838	0
P1_I_II	SGOL1	975.917	251.762	1.9547	2.22836	24.3709	3.47726e-131
P1_I_II	IQGAP3	2963.53	766.995	1.95003	2.22369	42.4144	0
P1_I_II	CD47	59191.3	15343.6	1.94775	2.22141	189.465	0
P1_I_II	YDJC	2781.86	722.568	1.94485	2.21851	41.0349	0
P1_I_II	ZMYND15	1910.92	496.452	1.94454	2.2182	34.0071	1.74942e-253
P1_I_II	RTKN	12313.7	3200.25	1.94401	2.21767	86.3155	0
P1_I_II	FBXO32	32655.6	8494.01	1.94281	2.21647	140.525	0
P1_I_II	SPTBN2	10455.2	2720.71	1.94217	2.21583	79.4946	0
P1_I_II	KRT16	236.869	61.6718	1.94141	2.21507	11.9625	5.58687e-33
P1_I_II	TONSL	3757.39	979.954	1.93894	2.2126	47.612	0
P1_I_II	HSBP1L1	3237.73	845.731	1.93671	2.21037	44.1695	0
P1_I_II	EHHADH	3564.26	931.698	1.93567	2.20933	46.3299	0
P1_I_II	CCR8	170.235	44.5032	1.93554	2.2092	10.1247	4.29385e-24
P1_I_II	OAS3	15181.8	3971.22	1.93469	2.20835	95.5943	0
P1_I_II	LAMA5	66254.4	17351.1	1.93299	2.20665	199.632	0
P1_I_II	PERP	33148	8684.54	1.9324	2.20606	141.17	0
P1_I_II	ATP10B	3080.43	807.204	1.93212	2.20578	43.028	0
P1_I_II	B3GNT3	1803.72	473.177	1.93052	2.20418	32.9104	1.56017e-237
P1_I_II	TREM2	3516.28	923.766	1.92845	2.20211	45.9241	0
P1_I_II	CCDC51	8968.6	2357.02	1.92792	2.20158	73.3335	0
P1_I_II	ALPP	728.896	191.653	1.92722	2.20088	20.9015	5.18756e-97
P1_I_II	KAAG1	295.237	77.7364	1.92521	2.19887	13.2949	2.47898e-40
P1_I_II	COX6C	112739	29696.7	1.92461	2.19827	259.831	0
P1_I_II	TMEM41A	8588.88	2263.54	1.92389	2.19755	71.6828	0
P1_I_II	ERP27	9062.62	2389.13	1.92344	2.1971	73.6241	0
P1_I_II	BTLA	171.685	45.2932	1.92239	2.19605	10.1302	4.05614e-24
P1_I_II	FAM49B	11133.4	2940.06	1.92098	2.19464	81.547	0
P1_I_II	GPT2	7120.78	1883.6	1.91854	2.1922	65.1709	0
P1_I_II	TFR2	231.239	61.195	1.9179	2.19156	11.7418	7.78521e-32
P1_I_II	CCNB1	11480.2	3042.85	1.91566	2.18931	82.6827	0
P1_I_II	BID	6380.68	1695.96	1.91161	2.18527	61.5699	0
P1_I_II	TNFRSF11B	3005.06	800.365	1.90866	2.18232	42.2176	0
P1_I_II	CHRNB4	292.446	78.1	1.90478	2.17844	13.1554	1.58379e-39
P1_I_II	SH3D21	4390.26	1173.95	1.90293	2.17659	50.9451	0
P1_I_II	MSH2	15387.7	4114.81	1.90288	2.17654	95.3787	0
P1_I_II	KIFC1	4037.98	1080.15	1.90241	2.17607	48.8511	0
P1_I_II	AC110619.2	502.763	134.588	1.90133	2.17499	17.232	1.52686e-66
P1_I_II	PRSS44	602.14	161.383	1.89961	2.17327	18.849	2.99298e-79
P1_I_II	CARD14	714.717	191.734	1.89827	2.17193	20.5277	1.21887e-93
P1_I_II	AK4	489.389	131.386	1.89718	2.17084	16.981	1.13507e-64
P1_I_II	ABCG8	137.68	36.9639	1.89713	2.17079	9.00672	2.12307e-19
P1_I_II	CDC25A	854.931	229.778	1.89557	2.16923	22.4337	1.84429e-111
P1_I_II	PRR15L	2261.79	608.004	1.89531	2.16897	36.4865	1.81335e-291
P1_I_II	HMGA1	16236.4	4373.04	1.89253	2.16619	97.6829	0
P1_I_II	CD9	138435	37348.8	1.89008	2.16374	285.122	0
P1_I_II	KRT18	100295	27060.4	1.88999	2.16365	242.656	0
P1_I_II	ADAMDEC1	286.289	77.5272	1.8847	2.15836	12.9412	2.63496e-38
P1_I_II	PPFIA3	1760.83	477.169	1.88369	2.15735	32.0852	7.08527e-226
P1_I_II	PLEKHG4B	2219.34	601.941	1.88244	2.1561	36.0082	6.22792e-284
P1_I_II	AKR1CL1	149.625	40.6114	1.8814	2.15506	9.3467	9.04276e-21
P1_I_II	MAP7	4115.12	1118.18	1.87979	2.15345	48.9945	0
P1_I_II	RCC1	7649.36	2081.69	1.87758	2.15124	66.7566	0
P1_I_II	KRT23	6441.97	1754.39	1.87654	2.1502	61.2431	0
P1_I_II	DEGS1	41282.5	11266.9	1.87344	2.1471	154.91	0
P1_I_II	LGR4	13945.6	3806.69	1.8732	2.14686	90.0228	0
P1_I_II	USP18	3949.71	1078.88	1.87222	2.14588	47.8938	0
P1_I_II	RHOV	1116.05	305.567	1.86884	2.1425	25.4334	1.07698e-142
P1_I_II	MYEF2	4375.3	1198.29	1.8684	2.14206	50.3519	0
P1_I_II	RASEF	1222.17	334.794	1.86811	2.14176	26.6095	5.27128e-156
P1_I_II	GPR158	167.52	45.8974	1.86785	2.14151	9.85078	6.8017e-23
P1_I_II	MRPL13	13810.1	3790.81	1.86515	2.13881	89.3729	0
P1_I_II	GGCT	8355.45	2293.99	1.86486	2.13852	69.5102	0
P1_I_II	UTP23	10444.6	2867.91	1.86468	2.13834	77.7121	0
P1_I_II	FAT2	4560.95	1255.58	1.86098	2.13464	51.2968	0
P1_I_II	ANXA9	1879.33	518.175	1.85871	2.13237	32.9057	1.82358e-237
P1_I_II	SYNDIG1	1652.5	455.73	1.8584	2.13206	30.8531	5.09752e-209
P1_I_II	SPINT2	64314.7	17744.4	1.85778	2.13144	192.476	0
P1_I_II	GRHL2	3585.83	990.46	1.85614	2.1298	45.4187	0
P1_I_II	CDH6	7060.32	1953.68	1.85354	2.1272	63.6828	0
P1_I_II	UBE2H	12748.6	3528.37	1.85327	2.12693	85.5682	0
P1_I_II	EZH2	3978.27	1102.96	1.85076	2.12442	47.7633	0
P1_I_II	ZIC2	143.718	39.8976	1.84887	2.12253	9.07308	1.15697e-19
P1_I_II	RGS1	6447.19	1790.71	1.84814	2.1218	60.7569	0
P1_I_II	C8orf77	402.351	111.924	1.84593	2.11959	15.1677	5.78302e-52
P1_I_II	MAP3K13	7630.85	2122.86	1.84583	2.11949	66.0542	0
P1_I_II	GTSE1	1533.09	426.704	1.84513	2.11879	29.6005	1.47041e-192
P1_I_II	NAPEPLD	5009.56	1395.48	1.84392	2.11758	53.4888	0
P1_I_II	HIST1H2BF	148.523	41.4475	1.84133	2.11499	9.20272	3.48995e-20
P1_I_II	C15orf52	1188.92	331.875	1.84093	2.11459	26.0343	2.02756e-149
P1_I_II	ZNF707	1513.54	423.384	1.83789	2.11155	29.3475	2.56933e-189
P1_I_II	MAPK13	4044.46	1131.88	1.83722	2.11088	47.9645	0
P1_I_II	CDCA7L	6866.86	1922.01	1.83704	2.11069	62.4953	0
P1_I_II	C8orf38	5862.35	1640.93	1.83697	2.11063	57.7424	0
P1_I_II	WDR12	9345.75	2617.82	1.83594	2.1096	72.8846	0
P1_I_II	SEC14L2	4435.14	1242.55	1.83567	2.10933	50.2043	0
P1_I_II	ECT2	3250.28	911.789	1.83379	2.10745	42.9537	0
P1_I_II	RRS1	3429.36	962.894	1.83249	2.10615	44.1039	0
P1_I_II	NCBP2	7807.77	2193.32	1.83179	2.10545	66.5346	0
P1_I_II	TOP1MT	10092.6	2837.05	1.83083	2.10449	75.6244	0
P1_I_II	LGR6	5209.34	1466.58	1.82864	2.1023	54.2949	0
P1_I_II	IL1A	125.323	35.3172	1.8272	2.10086	8.41759	3.84318e-17
P1_I_II	GPRIN2	343.523	96.8583	1.82646	2.10012	13.9333	3.97772e-44
P1_I_II	KIF15	939.459	265.053	1.82555	2.09921	23.0354	2.06152e-117
P1_I_II	HSH2D	3691.23	1042.73	1.82373	2.09739	45.6358	0
P1_I_II	CCL20	709.351	200.397	1.82364	2.0973	20.0048	4.99856e-89
P1_I_II	MKI67	3454.24	976.169	1.82316	2.09682	44.1389	0
P1_I_II	C1orf210	939.778	265.656	1.82276	2.09642	23.0198	2.95287e-117
P1_I_II	BCL11A	3719.4	1052.44	1.82134	2.095	45.7763	0
P1_I_II	CDC45	1553.77	439.776	1.82093	2.09459	29.583	2.47601e-192
P1_I_II	CAPG	21086.3	5993.3	1.81489	2.08855	108.786	0
P1_I_II	ASPHD1	880.264	250.259	1.81451	2.08817	22.223	2.05634e-109
P1_I_II	PABPC3	56630.1	16104.2	1.81413	2.08779	178.253	0
P1_I_II	C6orf132	8800.51	2502.81	1.81404	2.0877	70.2583	0
P1_I_II	TROAP	2998.13	852.771	1.81383	2.08749	41.0048	0
P1_I_II	PUS1	5841.12	1665.14	1.8106	2.08426	57.1784	0
P1_I_II	ANLN	3755.75	1070.89	1.81029	2.08395	45.8446	0
P1_IV_V	C4orf26	3089.52	9.1815	8.39444	8.64515	55.0939	0
P1_IV_V	MMP1	20841.4	69.0853	8.23686	8.48757	144.375	0
P1_IV_V	KRT81	24729.4	84.0647	8.20051	8.45122	157.583	0
P1_IV_V	MMP13	3460.31	12.1553	8.15317	8.40388	59.099	0
P1_IV_V	KRT6B	1699.4	6.18128	8.1029	8.35361	41.5286	0
P1_IV_V	IGLV3-27	11842.4	46.7618	7.98442	8.23513	110.315	0
P1_IV_V	IGKV3D-15	661.212	2.68908	7.94186	8.19257	26.1238	1.95876e-150
P1_IV_V	IGFL3	2393.45	10.3993	7.84647	8.09718	49.9425	0
P1_IV_V	GREM1	6357.99	27.8574	7.83437	8.08508	81.4478	0
P1_IV_V	MYL7	8178.88	37.402	7.77264	8.02336	92.6582	0
P1_IV_V	AC009958.1	381.899	1.79272	7.7349	7.98561	20.0587	1.69502e-89
P1_IV_V	IGKV6D-21	381.899	1.79272	7.7349	7.98561	20.0587	1.69502e-89
P1_IV_V	C5orf46	10378.7	50.8348	7.6736	7.92431	104.874	0
P1_IV_V	IGHV1OR21-1	168.591	0	7.55524	7.80595	13.4395	3.54625e-41
P1_IV_V	IGLV3-32	147.023	0	7.46626	7.71697	12.6002	2.10686e-36
P1_IV_V	IGKV6-21	2275.27	13.736	7.37193	7.62265	49.769	0
P1_IV_V	CXCL13	3334.35	21.692	7.2641	7.51481	60.5167	0
P1_IV_V	IGLV1-40	48767.8	344.958	7.14336	7.39408	232.54	0
P1_IV_V	IGKV5-2	5063.97	40.0026	6.98403	7.23475	75.3699	0
P1_IV_V	IGHV1-24	15941.7	135.181	6.88178	7.13249	134.195	0
P1_IV_V	AF254982.1	168.591	1.72777	6.60847	6.85919	13.915	5.13792e-44
P1_IV_V	IGKV2D-29	2748.6	29.9451	6.52023	6.77095	56.3169	0
P1_IV_V	ENTHD1	301.008	3.31599	6.50422	6.75493	18.6444	1.40241e-77
P1_IV_V	IGHV2-70	7635.88	87.4624	6.44799	6.6987	94.0355	0
P1_IV_V	KRT6A	12360.1	144.792	6.41557	6.66628	119.731	0
P1_IV_V	EPYC	2194.8	26.4736	6.37339	6.62411	50.502	0
P1_IV_V	KISS1	1743.64	21.0649	6.37112	6.62184	45.0155	0
P1_IV_V	IGHV3-21	18655.8	237.582	6.29505	6.54577	147.486	0
P1_IV_V	IGHJ2	264.945	3.45555	6.26063	6.51135	17.5881	3.04088e-69
P1_IV_V	IGHV1-46	9005.71	129.844	6.11599	6.36671	102.809	0
P1_IV_V	IGLV2-18	1627.71	23.596	6.10816	6.35887	43.7133	0
P1_IV_V	IGHG4	127034	1863.73	6.09088	6.34159	386.311	0
P1_IV_V	IGLV3-12	847.062	13.1573	6.00853	6.25924	31.5807	6.79462e-219
P1_IV_V	IGHV2-26	2151.49	33.5955	6.00092	6.25164	50.336	0
P1_IV_V	IGLV3-1	82971.5	1299.65	5.99642	6.24713	312.624	0
P1_IV_V	KRT82	202.34	3.31599	5.9312	6.18191	15.4499	7.55473e-54
P1_IV_V	C6orf15	2045.03	34.1188	5.90541	6.15612	49.1315	0
P1_IV_V	NLRP10	708.725	12.1936	5.86103	6.11174	28.9366	4.14174e-184
P1_IV_V	IGLV1-44	6501.92	114.54	5.82694	6.07765	87.6732	0
P1_IV_V	BARX1	380.112	6.81171	5.80226	6.05298	21.2027	9.02388e-100
P1_IV_V	C4orf7	777.002	14.0498	5.7893	6.04001	30.3173	6.78813e-202
P1_IV_V	IGLC1	166986	3051.8	5.77392	6.02463	444.548	0
P1_IV_V	IGHV2-5	11959.4	221.533	5.75448	6.0052	118.973	0
P1_IV_V	IGHV3-49	5036.52	93.4451	5.75217	6.00288	77.2079	0
P1_IV_V	IGLL5	167837	3114.18	5.75207	6.00278	445.748	0
P1_IV_V	IGLV6-57	41889.2	781.731	5.74376	5.99447	222.681	0
P1_IV_V	TNFRSF11B	42550.3	800.365	5.73237	5.98308	224.447	0
P1_IV_V	IGKV3D-20	1989.39	37.4812	5.73001	5.98073	48.5308	0
P1_IV_V	IGHV3-23	20353.5	390.673	5.70317	5.95388	155.256	0
P1_IV_V	BIRC7	1114.5	21.8865	5.67021	5.92092	36.3357	4.42414e-289
P1_IV_V	IGHV3-48	5677.73	112.72	5.6545	5.90521	82.0182	0
P1_IV_V	LGALS14	130.194	2.62413	5.63268	5.88339	12.4208	2.01426e-35
P1_IV_V	IGLV1-50	1164.95	24.3161	5.58222	5.83293	37.1592	3.10839e-302
P1_IV_V	IGLV2-23	16337.4	344.029	5.56951	5.82022	139.161	0
P1_IV_V	IGFBPL1	2193.2	46.4095	5.56247	5.81318	50.9877	0
P1_IV_V	IGHV3-73	1851.34	39.5335	5.54935	5.80006	46.8463	0
P1_IV_V	MMP11	81399.9	1763.18	5.52878	5.77949	310.653	0
P1_IV_V	AC142381.1	363.225	7.93735	5.51606	5.76678	20.7504	1.21701e-95
P1_IV_V	CR2	1149.37	25.5863	5.48933	5.74004	36.9115	3.02712e-298
P1_IV_V	IGFL1	779.549	17.4527	5.48112	5.73183	30.3983	5.786e-203
P1_IV_V	KRT75	293.352	6.57892	5.47864	5.72935	18.6475	1.32307e-77
P1_IV_V	MYEOV	2026.49	45.8243	5.46673	5.71744	49.0108	0
P1_IV_V	IGHV3-66	778.664	17.7725	5.45328	5.70399	30.3797	1.01928e-202
P1_IV_V	ODZ2	7937.74	183.575	5.43428	5.685	96.9929	0
P1_IV_V	IGHV4-34	27588.4	641.755	5.4259	5.67661	180.822	0
P1_IV_V	CCL18	15387.8	360.564	5.41538	5.6661	135.039	0
P1_IV_V	IGKV2D-40	186.876	4.38856	5.41219	5.6629	14.8812	4.36666e-50
P1_IV_V	SHISA9	802.674	18.9598	5.4038	5.65451	30.8402	7.57044e-209
P1_IV_V	IGKV4-1	147841	3603.34	5.35857	5.60928	418.516	0
P1_IV_V	CCL7	1219.27	29.9415	5.34773	5.59844	38.0006	0
P1_IV_V	IGLV2-11	16970	424.409	5.32139	5.5721	141.749	0
P1_IV_V	D87017.1	19502.7	505.65	5.26939	5.5201	151.904	0
P1_IV_V	IGLC7	19502.7	505.65	5.26939	5.5201	151.904	0
P1_IV_V	IGLV8-61	4677.05	125.091	5.22455	5.47526	74.3593	0
P1_IV_V	IGHV3-33	9281.28	248.57	5.2226	5.47331	104.748	0
P1_IV_V	IGHV1-58	1193.15	32.1866	5.21217	5.46288	37.553	0
P1_IV_V	SPP1	134449	3628.61	5.2115	5.46221	398.677	0
P1_IV_V	IGLV3-25	38721.3	1075.56	5.16997	5.42068	213.842	0
P1_IV_V	IGLV3-22	155.949	4.40447	5.14596	5.39667	13.5667	6.30998e-42
P1_IV_V	PPAPDC1A	3391.39	96.4101	5.13655	5.38726	63.2592	0
P1_IV_V	KRT85	265	7.54989	5.13339	5.38411	17.6823	5.73787e-70
P1_IV_V	ATP6V0D2	261.856	7.49733	5.12626	5.37697	17.5756	3.7912e-69
P1_IV_V	IGHV4-59	6237.21	180.389	5.11172	5.36243	85.7617	0
P1_IV_V	IGKV3-15	12355	361.69	5.0942	5.34491	120.676	0
P1_IV_V	PAX6	1575.68	46.2249	5.09116	5.34187	43.0933	0
P1_IV_V	GRP	750.86	22.0499	5.0897	5.34041	29.7472	1.88693e-194
P1_IV_V	ITGB6	38353.9	1148.57	5.06146	5.31217	212.524	0
P1_IV_V	SLC35D3	105.818	3.22899	5.03435	5.28507	11.158	6.54529e-29
P1_IV_V	IGKV1-8	2218.86	67.9772	5.02862	5.27934	51.0896	0
P1_IV_V	IGLV1-47	3948.08	120.995	5.02813	5.27884	68.1488	0
P1_IV_V	IGKJ5	1613.63	49.4845	5.02718	5.2779	43.5671	0
P1_IV_V	IGKV1D-12	2437.97	74.946	5.02369	5.2744	53.5485	0
P1_IV_V	IBSP	323.67	10.0027	5.01607	5.26678	19.5087	9.2532e-85
P1_IV_V	IGLV3-21	23892.5	742.744	5.00755	5.25826	167.593	0
P1_IV_V	SFN	8646.07	270.677	4.9974	5.24811	100.798	0
P1_IV_V	IGKV1D-8	1663.39	54.1217	4.94177	5.19249	44.1669	0
P1_IV_V	NOG	474.528	15.4496	4.94085	5.19157	23.5897	4.91549e-123
P1_IV_V	IGHV3-11	9156.19	302.079	4.92175	5.17246	103.583	0
P1_IV_V	IGHV5-51	13024.7	430.966	4.91753	5.16824	123.532	0
P1_IV_V	IGHV1-69	22600	751.796	4.90984	5.16055	162.7	0
P1_IV_V	IGHV1-8	3401.64	113.61	4.90407	5.15478	63.1127	0
P1_IV_V	IGHG2	73541.4	2462.46	4.90038	5.1511	293.45	0
P1_IV_V	IGKV3-11	17841.9	602.931	4.88714	5.13785	144.492	0
P1_IV_V	IGHV3-13	662.984	22.4633	4.88333	5.13405	27.8505	1.06157e-170
P1_IV_V	IGLV3-10	9488.17	323.028	4.8764	5.12711	105.344	0
P1_IV_V	IGLV3-9	5406.81	184.44	4.87356	5.12427	79.5174	0
P1_IV_V	IGKV1D-17	346.74	11.8964	4.86526	5.11597	20.1332	3.78062e-90
P1_IV_V	IGHV3-35	250.884	8.69979	4.8499	5.10061	17.1197	1.0577e-65
P1_IV_V	IGLC3	50492.1	1759.71	4.84264	5.09336	242.84	0
P1_IV_V	GJB2	10865.4	380.525	4.83561	5.08632	112.628	0
P1_IV_V	IGHG1	594952	20961.1	4.82699	5.0777	833.714	0
P1_IV_V	GDF6	1190.06	42.7709	4.79826	5.04898	37.2402	1.52526e-303
P1_IV_V	IGKV3-20	33260	1199.29	4.79353	5.04425	196.857	0
P1_IV_V	C12orf70	384.774	13.9891	4.78163	5.03234	21.1665	1.94508e-99
P1_IV_V	RP11-47I22.3	361.907	13.1701	4.78028	5.03099	20.5272	1.23101e-93
P1_IV_V	IGHV3-7	12950.9	471.841	4.77861	5.02932	122.792	0
P1_IV_V	IGKV1-27	4503.23	165.041	4.77007	5.02078	72.3904	0
P1_IV_V	IGHV3-53	1145.32	43.4899	4.71893	4.96964	36.4572	5.28714e-291
P1_IV_V	IGLV3-16	997.22	38.0046	4.71366	4.96438	34.0135	1.40717e-253
P1_IV_V	IGHV3-74	3722.9	143.396	4.69835	4.94906	65.6914	0
P1_IV_V	AL121963.1	2759.17	108.632	4.66671	4.91742	56.5005	0
P1_IV_V	IGLV1-51	10306.4	408.214	4.65808	4.90879	109.171	0
P1_IV_V	IGHV3-9	42252.6	1681.34	4.65136	4.90207	221.006	0
P1_IV_V	COL10A1	11700	465.975	4.65011	4.90082	116.289	0
P1_IV_V	ADAMDEC1	1936.94	77.5272	4.64293	4.89365	47.3048	0
P1_IV_V	C6orf105	940.141	37.9189	4.63189	4.8826	32.9453	4.94628e-238
P1_IV_V	EDN2	4381.9	179.602	4.60868	4.85939	71.0734	0
P1_IV_V	IGKV3D-11	1749.19	71.7105	4.60836	4.85907	44.9043	0
P1_IV_V	IGLV7-43	1980.29	81.5704	4.60152	4.85224	47.768	0
P1_IV_V	IGLV7-46	3963.7	164.753	4.58848	4.83919	67.5518	0
P1_IV_V	AC142381.2	162.983	6.98441	4.54444	4.79515	13.6773	1.38798e-42
P1_IV_V	IGHV3-30	21553.9	931.016	4.533	4.78371	157.226	0
P1_IV_V	IGFL2	3382.3	146.459	4.52944	4.78015	62.2736	0
P1_IV_V	MAGEA4	18906.8	832.336	4.50559	4.75631	147.108	0
P1_IV_V	CT45A5	905.207	40.2493	4.49121	4.74192	32.1707	4.53181e-227
P1_IV_V	STC2	11702.7	523.375	4.48285	4.73357	115.637	0
P1_IV_V	IGKJ4	2559.54	115.17	4.47405	4.72476	54.0612	0
P1_IV_V	CT45A4	905.207	41.0061	4.46434	4.71505	32.1377	1.31116e-226
P1_IV_V	IGKV2-30	865.242	39.4072	4.45657	4.70729	31.4108	1.44252e-216
P1_IV_V	AC110080.1	129.206	5.94849	4.44101	4.69173	12.1307	7.26595e-34
P1_IV_V	IGHV1-18	12548.5	578.879	4.43811	4.68882	119.535	0
P1_IV_V	LRRC15	3281.07	151.565	4.43615	4.68687	61.1177	0
P1_IV_V	CYP24A1	1851.99	86.5117	4.42004	4.67075	45.8876	0
P1_IV_V	IGHV4-31	16389	776.881	4.39889	4.6496	136.389	0
P1_IV_V	IGLC2	66457.2	3175.25	4.38748	4.6382	274.53	0
P1_IV_V	IGKV2-24	3688.82	176.512	4.38532	4.63604	64.6686	0
P1_IV_V	FCRL5	1586.44	76.7003	4.37042	4.62113	42.3822	0
P1_IV_V	CTHRC1	69076.8	3366.29	4.35897	4.60968	279.547	0
P1_IV_V	IGKC	1.05339e+06	51544.8	4.35307	4.60379	1092.58	0
P1_IV_V	IGHV3-20	788.011	38.6738	4.34879	4.5995	29.842	1.116e-195
P1_IV_V	ANXA8L2	613.075	31.6568	4.27548	4.52619	26.2336	1.10097e-151
P1_IV_V	IGKV1D-16	184.862	9.60854	4.26599	4.5167	14.3988	5.26339e-47
P1_IV_V	HOXB9	1143.47	59.5804	4.26243	4.51315	35.8048	9.3023e-281
P1_IV_V	CXCL10	9615.94	503.154	4.25636	4.50707	103.801	0
P1_IV_V	DKK1	949.582	49.8772	4.25084	4.50155	32.61	2.95929e-233
P1_IV_V	TRAV14/DV4	559.317	29.6544	4.23735	4.48806	25.0107	4.68159e-138
P1_IV_V	BHLHA15	203.734	10.8887	4.22578	4.47649	15.0861	1.99828e-51
P1_IV_V	SYT13	883.183	47.3602	4.22097	4.47168	31.4026	1.86186e-216
P1_IV_V	IGKV1-17	2131.96	115.759	4.20298	4.45369	48.7454	0
P1_IV_V	CXCL11	1847.19	101.333	4.18815	4.43886	45.3386	0
P1_IV_V	OLR1	6458.37	357.165	4.17651	4.42722	84.725	0
P1_IV_V	IGHV3-43	583.267	32.5043	4.16545	4.41617	25.4464	7.72818e-143
P1_IV_V	SDR16C5	847.548	47.3142	4.16295	4.41367	30.6703	1.41774e-206
P1_IV_V	IGKJ1	3339.32	186.702	4.16075	4.41146	60.8717	0
P1_IV_V	KRT7	118531	6758.53	4.13242	4.38313	362.157	0
P1_IV_V	CA9	2738.79	156.837	4.1262	4.37691	55.0237	0
P1_IV_V	CCR8	751.696	44.5032	4.07817	4.32888	28.7484	9.48562e-182
P1_IV_V	CHIT1	1753.68	104.164	4.07345	4.32417	43.8985	0
P1_IV_V	CTCFL	1365.96	81.7455	4.06263	4.31334	38.7185	0
P1_IV_V	IGHV1-45	249.983	15.1608	4.04342	4.29413	16.5448	1.74418e-61
P1_IV_V	BNC1	4545.47	282.935	4.00589	4.2566	70.39	0
P1_IV_V	ADM2	186.54	11.6248	4.0042	4.25492	14.258	3.99551e-46
P1_IV_V	INHBA	37984.8	2381.68	3.99537	4.24608	203.358	0
P1_IV_V	KRT80	8927.31	564.918	3.98211	4.23283	98.5011	0
P1_IV_V	COL11A1	24518.1	1554.15	3.97965	4.23036	163.217	0
P1_IV_V	IGHA1	136110	8681.52	3.97069	4.2214	384.4	0
P1_IV_V	IGLV1-36	931.799	60.4771	3.94556	4.19627	31.7484	3.34339e-221
P1_IV_V	IGHA2	20249.3	1319.39	3.93993	4.19064	147.951	0
P1_IV_V	CSF2	113.272	7.42484	3.93128	4.182	11.059	1.98358e-28
P1_IV_V	IGKV3-7	1580.17	104.629	3.91673	4.16745	41.2656	0
P1_IV_V	IGHV3-15	2784.15	184.404	3.91629	4.167	54.7735	0
P1_IV_V	PMEPA1	42533.1	2818.38	3.91565	4.16636	214.088	0
P1_IV_V	KCNJ6	280.038	18.6087	3.91157	4.16229	17.3658	1.49855e-67
P1_IV_V	IGHV3-38	355.885	23.7561	3.90504	4.15576	19.5682	2.8874e-85
P1_IV_V	ZFP42	947.382	63.6174	3.89645	4.14717	31.9085	2.03591e-223
P1_IV_V	TEX11	275.764	19.0842	3.85298	4.1037	17.1636	4.97736e-66
P1_IV_V	SERPINB5	2492.13	174.404	3.83688	4.08759	51.5382	0
P1_IV_V	IGLV10-54	1367.64	96.9277	3.81863	4.06935	38.1294	0
P1_IV_V	IGKV1-6	5830.07	416.513	3.80708	4.05779	78.6589	0
P1_IV_V	SRCRB4D	2441.72	176.138	3.79312	4.04383	50.8523	0
P1_IV_V	TGFBI	285083	20662.1	3.78633	4.03704	549.412	0
P1_IV_V	IGHV7-81	262.941	19.0775	3.78479	4.03551	16.6772	1.9208e-62
P1_IV_V	FOLR3	2425.59	177.708	3.77075	4.02147	50.5995	0
P1_IV_V	RP11-150O12.1	285.432	21.2363	3.74854	3.99926	17.3282	2.88149e-67
P1_IV_V	CLDN6	4761.74	354.895	3.74603	3.99674	70.7627	0
P1_IV_V	CXCL9	3303.58	246.964	3.74166	3.99237	58.9205	0
P1_IV_V	IGHV3-72	879.428	66.5105	3.72491	3.97563	30.3604	1.83105e-202
P1_IV_V	CLEC5A	667.467	50.5071	3.72414	3.97485	26.4482	3.82621e-154
P1_IV_V	SLC5A12	277.676	21.2766	3.70606	3.95677	17.0346	4.55077e-65
P1_IV_V	IGHE	135.716	10.4303	3.70174	3.95245	11.9049	1.11532e-32
P1_IV_V	IGLV9-49	460.538	35.5489	3.69544	3.94615	21.9193	1.70083e-106
P1_IV_V	KIAA0125	295.716	22.9406	3.68824	3.93895	17.5541	5.53066e-69
P1_IV_V	C10orf47	5768.44	449.225	3.68267	3.93338	77.4961	0
P1_IV_V	C19orf59	918.587	71.663	3.68012	3.93083	30.9185	6.74736e-210
P1_IV_V	IGKJ3	329.554	25.8755	3.67086	3.92157	18.5052	1.87547e-76
P1_IV_V	IGKV1-16	3153.95	249.989	3.65722	3.90794	57.1837	0
P1_IV_V	IGLJ1	749.682	59.8694	3.64639	3.8971	27.8543	9.56412e-171
P1_IV_V	C3orf55	1181.14	94.3731	3.64566	3.89638	34.9606	8.93834e-268
P1_IV_V	IGHJ5	478.819	38.2728	3.64509	3.8958	22.2583	9.37416e-110
P1_IV_V	FAP	11806.9	946.553	3.6408	3.89151	110.491	0
P1_IV_V	TDO2	3180.73	257.64	3.62593	3.87664	57.2759	0
P1_IV_V	IGHV4-28	1904.93	154.929	3.62006	3.87077	44.3027	0
P1_IV_V	IGHD	2797.54	229.35	3.60854	3.85925	53.6355	0
P1_IV_V	ZNF280A	341.437	28.3073	3.59238	3.84309	18.7116	3.97933e-78
P1_IV_V	FRMD5	2033.26	169.267	3.58642	3.83714	45.6382	0
P1_IV_V	AC021066.1	460.321	38.754	3.57022	3.82094	21.6842	2.89114e-104
P1_IV_V	KRT86	460.321	38.754	3.57022	3.82094	21.6842	2.89114e-104
P1_IV_V	NETO1	391.429	33.0238	3.56717	3.81788	19.9904	6.67245e-89
P1_IV_V	PDE6G	666.903	56.6968	3.55614	3.80685	26.0676	8.50492e-150
P1_IV_V	CD274	2077.76	177.001	3.5532	3.80391	45.9995	0
P1_IV_V	IGKJ2	2198.3	187.64	3.55035	3.80106	47.303	0
P1_IV_V	IGHV4-4	2587.91	221.849	3.54414	3.79485	51.2953	0
P1_IV_V	OVCH2	528.086	45.2946	3.54336	3.79407	23.1698	9.17237e-119
P1_IV_V	WNT10A	2179.51	190.702	3.51461	3.76532	46.9473	0
P1_IV_V	MYO16	2153.22	191.53	3.49085	3.74156	46.5602	0
P1_IV_V	TNFRSF17	744.689	66.3221	3.48908	3.73979	27.377	5.15953e-165
P1_IV_V	IGHJ6	394.502	35.3641	3.47967	3.73039	19.9084	3.44178e-88
P1_IV_V	TRBV4-2	804.913	72.3934	3.4749	3.72562	28.4243	1.01276e-177
P1_IV_V	ELAVL2	441.725	39.9308	3.46757	3.71829	21.042	2.70584e-98
P1_IV_V	IL2RA	1516.43	138.236	3.45548	3.70619	38.942	0
P1_IV_V	CCL17	317.983	29.3067	3.43965	3.69036	17.805	6.46846e-71
P1_IV_V	RP11-890B15.2	137.143	12.7327	3.42906	3.67978	11.6808	1.59706e-31
P1_IV_V	GJB3	2020.09	189.634	3.41313	3.66384	44.7599	0
P1_IV_V	CSMD2	1483.93	139.726	3.40875	3.65946	38.346	0
P1_IV_V	CDKN2A	4876.4	470.642	3.37311	3.62383	69.2624	0
P1_IV_V	HAPLN1	745.563	72.0632	3.37099	3.62171	27.0765	1.86215e-161
P1_IV_V	LANCL3	222.198	21.5069	3.36897	3.61969	14.7785	2.01638e-49
P1_IV_V	DPEP3	1774.37	172.964	3.35877	3.60948	41.7182	0
P1_IV_V	IGHV1-3	5197.81	513.139	3.34048	3.5912	71.2666	0
P1_IV_V	ANKRD34B	171.887	17.0173	3.33639	3.5871	12.9541	2.2283e-38
P1_IV_V	ISL1	103.453	10.3787	3.31728	3.56799	10.0294	1.13197e-23
P1_IV_V	TMEM158	1323.74	132.851	3.31674	3.56746	35.8741	7.75766e-282
P1_IV_V	KRT8P11	918.182	93.6053	3.29412	3.54483	29.8046	3.41004e-195
P1_IV_V	RP11-1280I22.1	3568.42	366.102	3.28497	3.53568	58.6982	0
P1_IV_V	EGFL6	8395.7	867.723	3.27434	3.52506	89.9313	0
P1_IV_V	CD70	458.317	47.6384	3.26615	3.51686	20.9926	7.66683e-98
P1_IV_V	IL11	237.453	24.7552	3.26184	3.51255	15.103	1.54754e-51
P1_IV_V	C3orf80	106.638	11.1234	3.26105	3.51176	10.1203	4.49164e-24
P1_IV_V	SRMS	270.675	28.2478	3.26035	3.51106	16.1223	1.77985e-58
P1_IV_V	PLAU	71171	7444.8	3.25698	3.5077	261.361	0
P1_IV_V	DIO2	1355.61	142.364	3.25129	3.50201	36.0438	1.72225e-284
P1_IV_V	MS4A1	801.757	85.2947	3.23264	3.48335	27.661	2.05677e-168
P1_IV_V	SUSD2	23665.6	2525.63	3.22808	3.47879	150.209	0
P1_IV_V	PTPRN	515.446	55.2409	3.22201	3.47273	22.1519	9.99945e-109
P1_IV_V	ZYG11A	626.549	67.2391	3.22005	3.47077	24.4174	1.11774e-131
P1_IV_V	TM7SF4	218.881	23.5165	3.2184	3.46911	14.4292	3.38962e-47
P1_IV_V	TRBV11-1	104.247	11.2803	3.20813	3.45884	9.94618	2.62051e-23
P1_IV_V	SAA1	16705.5	1809.54	3.20663	3.45734	125.89	0
P1_IV_V	IGKV1D-42	143.724	15.6379	3.20018	3.4509	11.6678	1.86245e-31
P1_IV_V	PLA2G2D	240.83	26.4328	3.18761	3.43833	15.0813	2.1488e-51
P1_IV_V	IGHV6-1	2988.17	328.956	3.1833	3.43401	53.0968	0
P1_IV_V	AL353997.5	309.07	34.0396	3.18265	3.43336	17.0749	2.2812e-65
P1_IV_V	RASGEF1A	3755.88	413.762	3.18228	3.43299	59.521	0
P1_IV_V	C10orf55	5875.07	647.697	3.18122	3.43193	74.4334	0
P1_IV_V	GABRG3	645.383	71.3366	3.17744	3.42816	24.6588	2.9583e-134
P1_IV_V	LAX1	968.583	107.267	3.17467	3.42538	30.1988	2.45601e-200
P1_IV_V	TRBV9	306.499	34.0249	3.17122	3.42193	16.9808	1.14014e-64
P1_IV_V	GUCA1A	147.451	16.372	3.17093	3.42164	11.7774	5.10139e-32
P1_IV_V	GPR15	954.994	106.412	3.16583	3.41654	29.9547	3.82583e-197
P1_IV_V	LPO	381.853	42.6159	3.16356	3.41427	18.9363	5.73271e-80
P1_IV_V	TRAV27	149.953	16.8077	3.15731	3.40803	11.8576	1.96447e-32
P1_IV_V	SUCNR1	237.675	26.6706	3.15567	3.40638	14.9254	2.25172e-50
P1_IV_V	L1CAM	11093	1249.68	3.15003	3.40074	101.9	0
P1_IV_V	KRT14	1162.3	131.779	3.14078	3.3915	32.9467	4.71037e-238
P1_IV_V	C17orf104	759.432	86.2009	3.13915	3.38986	26.6264	3.36286e-156
P1_IV_V	IGHJ3	188.951	21.6063	3.12849	3.3792	13.264	3.74175e-40
P1_IV_V	FPR3	7927.9	910.508	3.1222	3.37291	85.8519	0
P1_IV_V	CCL13	1829.67	211.282	3.11434	3.36505	41.2032	0
P1_IV_V	FOXE1	123.898	14.4494	3.10008	3.35079	10.703	9.85414e-27
P1_IV_V	UGT3A2	357.672	41.8121	3.09664	3.34736	18.1772	7.81702e-74
P1_IV_V	DNAH17	6231.42	728.968	3.09564	3.34635	75.8628	0
P1_IV_V	CD79A	1531.06	179.251	3.09448	3.34519	37.598	0
P1_IV_V	KRT17	31613.7	3714.7	3.08923	3.33994	170.743	0
P1_IV_V	KCNU1	150.816	17.7526	3.08669	3.3374	11.7887	4.46431e-32
P1_IV_V	TNF	1451.37	171.393	3.08204	3.33275	36.549	1.8463e-292
P1_IV_V	KRT83	145.964	17.2623	3.07992	3.33063	11.5876	4.76452e-31
P1_IV_V	RSAD2	8219.93	972.48	3.07939	3.3301	86.952	0
P1_IV_V	DLX4	108.377	12.8608	3.075	3.32572	9.97851	1.89281e-23
P1_IV_V	CTLA4	662.632	78.9225	3.0697	3.32041	24.657	3.09653e-134
P1_IV_V	CD80	653.82	78.1176	3.06517	3.31589	24.4783	2.51614e-132
P1_IV_V	DNAJC5B	253.921	30.4169	3.06144	3.31215	15.2473	1.716e-52
P1_IV_V	SLC1A3	11608.8	1390.76	3.06128	3.31199	103.095	0
P1_IV_V	WDR72	1065.44	127.655	3.06113	3.31184	31.2314	3.99335e-214
P1_IV_V	GJB6	265.312	31.8255	3.05944	3.31015	15.5815	9.71934e-55
P1_IV_V	SLAMF8	5426.07	651.517	3.05803	3.30875	70.453	0
P1_IV_V	HEATR7B1	467.089	56.3044	3.05238	3.30309	20.6555	8.71068e-95
P1_IV_V	SULF1	28586.2	3447.71	3.05161	3.30232	161.582	0
P1_IV_V	PRR16	2745.67	331.604	3.04963	3.30034	50.0618	0
P1_IV_V	IGHV4-61	3232.12	392.54	3.04157	3.29228	54.259	0
P1_IV_V	IGHV1-2	1188.09	144.373	3.04077	3.29148	32.8932	2.7515e-237
P1_IV_V	KCNS1	138.856	16.9291	3.03602	3.28673	11.2381	2.65035e-29
P1_IV_V	IGLL1	120.072	14.6772	3.03226	3.28297	10.4452	1.54115e-25
P1_IV_V	ERMN	173.34	21.2385	3.02885	3.27957	12.5444	4.26431e-36
P1_IV_V	CEP55	2786.23	342.03	3.02612	3.27683	50.2755	0
P1_IV_V	KCNJ15	3003.66	368.737	3.02606	3.27677	52.1999	0
P1_IV_V	SPOCK2	10738.5	1320.58	3.02355	3.27427	98.6686	0
P1_IV_V	TRAT1	333.108	41.2046	3.01511	3.26583	17.3582	1.70896e-67
P1_IV_V	IGLV2-8	5649.5	706.884	2.99858	3.24929	71.3282	0
P1_IV_V	S100A2	2312.13	290.176	2.99422	3.24494	45.6043	0
P1_IV_V	CCR4	1238.39	155.892	2.98985	3.24056	33.3558	6.00955e-244
P1_IV_V	CCK	100.471	12.6532	2.98921	3.23992	9.5	2.09892e-21
P1_IV_V	HTR1D	617.615	78.079	2.9837	3.23442	23.5363	1.73359e-122
P1_IV_V	IGHV3-64	1142.17	144.411	2.98353	3.23424	32.0063	8.90385e-225
P1_IV_V	IGFBP3	91156.8	11557.8	2.97949	3.2302	285.822	0
P1_IV_V	TRAV26-1	135.855	17.2986	2.97334	3.22405	11.0231	2.95828e-28
P1_IV_V	RUNX2	3334.87	427.031	2.96522	3.21593	54.5536	0
P1_IV_V	IGHM	23832.4	3057.41	2.96254	3.21326	145.789	0
P1_IV_V	TNS4	6943.83	895.033	2.95572	3.20643	78.617	0
P1_IV_V	NTM	1798.27	233.406	2.94569	3.19641	39.9516	0
P1_IV_V	TRAV1-2	321.043	41.9382	2.93643	3.18714	16.8587	9.05534e-64
P1_IV_V	CST6	10003.2	1312.08	2.93054	3.18125	94.0287	0
P1_IV_V	KRT16	470.168	61.6718	2.93049	3.18121	20.3848	2.28125e-92
P1_IV_V	POTEC	114.685	15.0647	2.92843	3.17914	10.0648	7.9034e-24
P1_IV_V	HS3ST2	643.4	84.6171	2.92669	3.17741	23.8335	1.50286e-125
P1_IV_V	NFE2L3	7807.34	1027.38	2.92586	3.17658	83.0143	0
P1_IV_V	MARCO	6834.2	906.334	2.91466	3.16537	77.5449	0
P1_IV_V	SERPINB2	3047.55	404.245	2.91435	3.16506	51.7801	0
P1_IV_V	FCRL2	304.333	40.4497	2.91145	3.16216	16.3561	3.93537e-60
P1_IV_V	TRGV5	198.139	26.6662	2.89343	3.14414	13.1633	1.42742e-39
P1_IV_V	MFI2	6498.31	875.203	2.89237	3.14309	75.3734	0
P1_IV_V	HTRA4	367.286	49.4961	2.89152	3.14223	17.9168	8.71255e-72
P1_IV_V	RAB42	448.064	60.476	2.88927	3.13998	19.7828	4.18864e-87
P1_IV_V	TNFSF11	100.693	13.6606	2.88187	3.13258	9.36804	7.38885e-21
P1_IV_V	GATA3	1225.72	166.514	2.87992	3.13063	32.6755	3.47568e-234
P1_IV_V	DPYS	774.661	105.387	2.87787	3.12859	25.9688	1.11456e-148
P1_IV_V	LTB	2600.47	354.359	2.87549	3.1262	47.5633	0
P1_IV_V	IGHV4-39	2627.16	358.123	2.87498	3.12569	47.8032	0
P1_IV_V	EGLN3	11714.7	1603.51	2.86901	3.11972	100.857	0
P1_IV_V	CCL22	157.467	21.5904	2.86658	3.1173	11.6888	1.45432e-31
P1_IV_V	SPHK1	9141.58	1258.78	2.86042	3.11113	88.9811	0
P1_IV_V	COL8A1	28067.4	3865.33	2.86023	3.11095	155.917	0
P1_IV_V	SYT4	228.88	31.6508	2.85428	3.10499	14.0666	6.0969e-45
P1_IV_V	IL7R	5862.96	812.506	2.85118	3.10189	71.1617	0
P1_IV_V	DSC3	1427.14	197.828	2.85081	3.10152	35.107	5.26382e-270
P1_IV_V	C15orf48	4161.14	577.501	2.84908	3.09979	59.9317	0
P1_IV_V	HP	12854.7	1784.6	2.84862	3.09933	105.332	0
P1_IV_V	B3GNT4	671.231	93.3148	2.84663	3.09734	24.0616	6.3095e-128
P1_IV_V	TNFRSF13B	115.32	16.146	2.8364	3.08711	9.95803	2.32621e-23
P1_IV_V	TRBV30	112.397	15.7659	2.83372	3.08444	9.82705	8.61062e-23
P1_IV_V	MSR1	6570.23	923.886	2.83016	3.08087	75.0945	0
P1_IV_V	LIX1	805.045	113.497	2.82641	3.07712	26.271	4.11536e-152
P1_IV_V	TRBV27	574.306	81.034	2.82522	3.07593	22.185	4.79639e-109
P1_IV_V	GAL	175.224	24.7478	2.82383	3.07454	12.2516	1.6471e-34
P1_IV_V	KIF26B	2913.83	412.03	2.82209	3.07281	49.9476	0
P1_IV_V	EIF5A2	2421.79	342.849	2.82043	3.07114	45.5241	0
P1_IV_V	PDCD1	321.659	45.6009	2.8184	3.06911	16.5857	8.83842e-62
P1_IV_V	GPR176	5716.36	819.211	2.80279	3.0535	69.7528	0
P1_IV_V	TRAV8-2	122.5	17.5831	2.80051	3.05123	10.2073	1.83868e-24
P1_IV_V	CXCL5	130.274	18.7258	2.79845	3.04916	10.5229	6.778e-26
P1_IV_V	PCDHB8	416.981	59.9683	2.79771	3.04842	18.8241	4.79217e-79
P1_IV_V	LAIR2	226.5	32.8262	2.78659	3.0373	13.8497	1.27779e-43
P1_IV_V	ST6GALNAC5	5006.75	726.904	2.78404	3.03475	65.0901	0
P1_IV_V	KLHDC7B	469.18	68.1854	2.78261	3.03332	19.9207	2.68955e-88
P1_IV_V	PLK1	6227.74	907.79	2.77828	3.02899	72.529	0
P1_IV_V	IGHG3	48196.8	7032.21	2.77689	3.0276	201.742	0
P1_IV_V	MYBL2	7742.32	1131.9	2.77402	3.02473	80.8151	0
P1_IV_V	TRAV12-2	281.733	41.3972	2.76672	3.01743	15.3982	1.68347e-53
P1_IV_V	KIF1A	5567.61	825.955	2.75292	3.00364	68.3027	0
P1_IV_V	TRAV29DV5	183.221	27.3939	2.74166	2.99237	12.3681	3.89124e-35
P1_IV_V	IFI30	76412.3	11434.2	2.74045	2.99116	252.567	0
P1_IV_V	DERL3	4368.14	654.572	2.7384	2.98911	60.3585	0
P1_IV_V	SERPINB10	2071.08	310.362	2.73836	2.98907	41.5607	0
P1_IV_V	IGKV1-9	9847.41	1477.63	2.73646	2.98717	90.5983	0
P1_IV_V	SLC2A1	52387.1	7872.7	2.73428	2.985	208.908	0
P1_IV_V	IGLV2-14	9416.63	1415.96	2.73343	2.98415	88.5511	0
P1_IV_V	IL9R	232.042	34.992	2.72929	2.98	13.8909	7.19541e-44
P1_IV_V	EDN1	8996.96	1357.16	2.72885	2.97956	86.491	0
P1_IV_V	SLC35F3	827.164	124.795	2.72861	2.97932	26.2238	1.42395e-151
P1_IV_V	TRAV2	160.782	24.2851	2.72697	2.97768	11.5585	6.68614e-31
P1_IV_V	CCL11	2415.1	367.155	2.71762	2.96833	44.729	0
P1_IV_V	TRBV24-1	128.079	19.5154	2.71435	2.96506	10.295	7.42081e-25
P1_IV_V	LILRB4	8407.94	1282.46	2.71284	2.96355	83.3935	0
P1_IV_V	CENPA	1000.49	152.801	2.71099	2.9617	28.7578	7.22747e-182
P1_IV_V	CDC20	5527.6	846.021	2.70789	2.9586	67.5616	0
P1_IV_V	TNFRSF9	737.793	113.621	2.69899	2.9497	24.6465	4.0093e-134
P1_IV_V	PRAME	29364.9	4573.39	2.68276	2.93347	155.079	0
P1_IV_V	WNT7A	1265.36	197.217	2.68169	2.9324	32.1842	2.93408e-227
P1_IV_V	C7orf29	1567.77	245.67	2.67392	2.92463	35.7776	2.46547e-280
P1_IV_V	IGKV1-5	67152.6	10555.5	2.66945	2.92016	234.008	0
P1_IV_V	STRA8	250.583	39.6615	2.65948	2.91019	14.2686	3.43404e-46
P1_IV_V	PKD2L1	122.781	19.4584	2.65762	2.90834	9.98468	1.77878e-23
P1_IV_V	CHST11	10137	1607.86	2.65642	2.90713	90.7072	0
P1_IV_V	TRAV19	356.05	56.6201	2.65269	2.90341	16.9886	9.97097e-65
P1_IV_V	AC073416.2	3194.3	510.676	2.64502	2.89573	50.8184	0
P1_IV_V	IGKV1D-43	3202.43	513.086	2.64189	2.89261	50.8556	0
P1_IV_V	TRAV16	194.261	31.148	2.64079	2.8915	12.523	5.59173e-36
P1_IV_V	VDR	4029.96	647.413	2.63801	2.88872	57.011	0
P1_IV_V	P2RY10	1155.18	185.734	2.63681	2.88752	30.5169	1.5547e-204
P1_IV_V	SIGLEC12	276.597	44.7586	2.62755	2.87826	14.9087	2.89246e-50
P1_IV_V	TRBV28	523.975	85.1206	2.62192	2.87263	20.4996	2.16968e-93
P1_IV_V	GFRA1	15455.1	2518.73	2.61731	2.86802	111.247	0
P1_IV_V	PAX5	115.012	18.75	2.61683	2.86754	9.59567	8.3371e-22
P1_IV_V	MMP10	143.563	23.4138	2.61625	2.86696	10.7196	8.23157e-27
P1_IV_V	IGLV3-19	13863.2	2269.07	2.61109	2.86181	105.247	0
P1_IV_V	LOX	17422.3	2864.34	2.60466	2.85537	117.853	0
P1_IV_V	TIGIT	989.844	163.062	2.60178	2.85249	28.076	1.92585e-173
P1_IV_V	ADH4	257.229	42.3764	2.60172	2.85244	14.3122	1.83599e-46
P1_IV_V	VCAN	41590.3	6854.93	2.60103	2.85175	181.981	0
P1_IV_V	TUBB2B	1690.35	279.601	2.59589	2.8466	36.651	4.41048e-294
P1_IV_V	CDSN	2215.1	366.635	2.59495	2.84567	41.949	0
P1_IV_V	CATSPER1	370.596	61.3666	2.59432	2.84503	17.1563	5.6346e-66
P1_IV_V	NXPH4	455.177	75.3974	2.59384	2.84456	19.012	1.35633e-80
P1_IV_V	TCL1A	120.158	19.9254	2.59225	2.84296	9.76539	1.58495e-22
P1_IV_V	PTX3	5822.13	966.777	2.59029	2.84101	67.953	0
P1_IV_V	NKD2	1738.68	288.92	2.58925	2.83997	37.1273	1.0188e-301
P1_IV_V	ANKRD22	428.489	71.2526	2.58824	2.83896	18.4278	7.86032e-76
P1_IV_V	TRAV9-2	200.128	33.3708	2.58426	2.83497	12.5848	2.55924e-36
P1_IV_V	HAVCR2	4121.43	690.666	2.57708	2.8278	57.0374	0
P1_IV_V	FCGR3A	13659.3	2289.3	2.5769	2.82761	103.835	0
P1_IV_V	FCRL3	498.654	83.5818	2.57678	2.82749	19.8385	1.38518e-87
P1_IV_V	SAA2	2453.62	411.573	2.57569	2.8264	43.9976	0
P1_IV_V	DLEU2L	211.132	35.4737	2.57332	2.82404	12.9007	4.45793e-38
P1_IV_V	RGS1	10652.8	1790.71	2.57262	2.82334	91.6271	0
P1_IV_V	SCD	17074.9	2870.95	2.57228	2.82299	115.998	0
P1_IV_V	ANLN	6342.22	1070.89	2.56618	2.81689	70.6157	0
P1_IV_V	FGF1	812.011	138.246	2.55426	2.80497	25.2123	2.93774e-140
P1_IV_V	TRAV12-3	212.708	36.2514	2.55276	2.80348	12.9004	4.47762e-38
P1_IV_V	CPA4	1695.5	289.647	2.54934	2.80005	36.3989	4.42708e-290
P1_IV_V	KAAG1	454.421	77.7364	2.54737	2.79808	18.8369	3.76118e-79
P1_IV_V	SLC16A3	11768.3	2023.51	2.53997	2.79069	95.7316	0
P1_IV_V	REG1A	396.608	68.3773	2.53612	2.78684	17.5614	4.86609e-69
P1_IV_V	DLX3	163.818	28.3262	2.53189	2.7826	11.2776	1.69267e-29
P1_IV_V	TRAV13-1	432.564	74.9097	2.52969	2.7804	18.3183	5.9172e-75
P1_IV_V	PLEK2	1500.15	260.201	2.52741	2.77813	34.0991	7.59516e-255
P1_IV_V	GBP5	7440.65	1301.03	2.51578	2.76649	75.7774	0
P1_IV_V	SLC10A4	181.679	31.8698	2.51113	2.76185	11.8304	2.71793e-32
P1_IV_V	FCRLA	302.835	53.141	2.51063	2.76135	15.2725	1.16658e-52
P1_IV_V	LTA	143.718	25.3413	2.50368	2.75439	10.5073	7.999e-26
P1_IV_V	MOXD1	3585.27	633.147	2.50147	2.75218	52.4586	0
P1_IV_V	VPREB3	230.536	40.8654	2.49604	2.74675	13.2884	2.70353e-40
P1_IV_V	FOXP3	428.088	75.9376	2.49502	2.74573	18.1044	2.93946e-73
P1_IV_V	UGT3A1	268.836	47.8472	2.49022	2.74093	14.3339	1.34422e-46
P1_IV_V	HSPA6	2866.75	514.703	2.47761	2.72832	46.6943	0
P1_IV_V	HS3ST3A1	310.159	55.8247	2.47403	2.72475	15.3482	3.64058e-53
P1_IV_V	NNMT	129914	23400.5	2.47294	2.72365	314.14	0
P1_IV_V	KYNU	1515.93	273.341	2.47143	2.72214	33.9147	4.04228e-252
P1_IV_V	MELK	2735.72	493.575	2.47058	2.72129	45.5526	0
P1_IV_V	SBSN	115.296	20.8389	2.46799	2.7187	9.3468	9.03416e-21
P1_IV_V	RIMKLA	615.853	111.694	2.46303	2.71374	21.5812	2.69765e-103
P1_IV_V	ICOS	448.451	81.5968	2.45837	2.70908	18.3992	1.33355e-75
P1_IV_V	IGF2BP3	1359.34	247.93	2.4549	2.70562	32.0119	7.45864e-225
P1_IV_V	SLAMF7	2219.87	406.004	2.45091	2.70163	40.8763	0
P1_IV_V	TUFT1	6178.02	1130.73	2.44989	2.7006	68.1786	0
P1_IV_V	CDCA8	954.259	175.172	2.44561	2.69632	26.7722	6.80409e-158
P1_IV_V	SNX10	2252.15	414.36	2.44234	2.69306	41.1027	0
P1_IV_V	TNFRSF18	200.356	37.011	2.43654	2.68725	12.2453	1.77944e-34
P1_IV_V	PKP1	533.256	98.615	2.43495	2.68566	19.971	9.83729e-89
P1_IV_V	LAMA3	39407.3	7296.97	2.43309	2.68381	171.632	0
P1_IV_V	CAPG	32181.7	5993.3	2.42482	2.67553	154.842	0
P1_IV_V	AURKA	4528.99	843.924	2.424	2.67472	58.0748	0
P1_IV_V	APCDD1L	180.32	33.6418	2.42223	2.67294	11.5838	4.98131e-31
P1_IV_V	FCGR2C	1193.36	222.712	2.42178	2.67249	29.7972	4.25036e-195
P1_IV_V	LY6K	1453.72	271.331	2.42162	2.67234	32.8864	3.43633e-237
P1_IV_V	TLL2	699.959	131.118	2.41641	2.66712	22.7958	5.04143e-115
P1_IV_V	SIGLEC8	203.246	38.1188	2.41465	2.66537	12.2794	1.16891e-34
P1_IV_V	SLC6A15	179.627	33.8392	2.40824	2.65895	11.5289	9.43695e-31
P1_IV_V	IGHJ4	621.525	117.196	2.40689	2.6576	21.4394	5.73783e-102
P1_IV_V	AIM2	341.33	64.9629	2.39348	2.64419	15.8447	1.53055e-56
P1_IV_V	SIGLEC10	1573.57	299.899	2.39149	2.6422	34.0065	1.7853e-253
P1_IV_V	TREM1	5679.05	1087.57	2.38454	2.63526	64.5121	0
P1_IV_V	TRBV6-5	130.667	25.1718	2.37601	2.62672	9.76818	1.54198e-22
P1_IV_V	TTK	1248.53	240.925	2.37358	2.62429	30.1796	4.39282e-200
P1_IV_V	ANXA3	10951.2	2128.57	2.36313	2.61385	89.1883	0
P1_IV_V	KBTBD8	306.137	59.6389	2.35985	2.61057	14.9013	3.23001e-50
P1_IV_V	CD28	667.443	130.113	2.35888	2.60959	21.9981	2.9999e-107
P1_IV_V	KMO	811.655	158.778	2.35386	2.60457	24.233	1.00025e-129
P1_IV_V	KRT8	107162	20981	2.35264	2.60335	278.441	0
P1_IV_V	TRBV5-1	220.377	43.1934	2.35109	2.6018	12.6197	1.64404e-36
P1_IV_V	SIRPG	901.561	177.004	2.34864	2.59936	25.5118	1.45934e-143
P1_IV_V	PRR11	3591.39	706.402	2.34598	2.59669	50.89	0
P1_IV_V	SLAMF9	183.743	36.1684	2.34489	2.5956	11.5081	1.20144e-30
P1_IV_V	LYZ	34853.6	6888.78	2.33899	2.5897	158.311	0
P1_IV_V	TRIM59	1951.75	386.427	2.3365	2.58721	37.44	8.7389e-307
P1_IV_V	ECE2	4549.77	901.533	2.33534	2.58606	57.1498	0
P1_IV_V	PAX9	140.978	27.9433	2.33489	2.58561	10.0589	8.39651e-24
P1_IV_V	BIRC5	2080.09	414.123	2.32851	2.57923	38.5855	0
P1_IV_V	HJURP	2710.28	539.593	2.3285	2.57921	44.0442	0
P1_IV_V	ACP5	12002	2394.49	2.32549	2.5762	92.627	0
P1_IV_V	POU2AF1	783.54	157.578	2.31394	2.56465	23.6074	3.23728e-123
P1_IV_V	LCP1	25913.9	5212.33	2.31372	2.56444	135.765	0
P1_IV_V	IGJ	35366.6	7115.32	2.31339	2.5641	158.597	0
P1_IV_V	OBFC2A	4600.56	925.717	2.31317	2.56388	57.1944	0
P1_IV_V	APOC1	15214.2	3065.19	2.31137	2.56209	103.972	0
P1_IV_V	CTD-2547L24.3	419.956	84.7504	2.30895	2.55966	17.2643	8.7388e-67
P1_IV_V	TRBV3-1	193.841	39.2202	2.3052	2.55592	11.7197	1.0107e-31
P1_IV_V	TFAP2A	851.691	172.576	2.3031	2.55381	24.5547	3.85468e-133
P1_IV_V	TRAV22	121.381	24.6124	2.30208	2.5528	9.26769	1.90223e-20
P1_IV_V	LDHA	158715	32241.5	2.29945	2.55016	335.053	0
P1_IV_V	MET	6805.88	1382.68	2.29931	2.55002	69.3557	0
P1_IV_V	FBP1	4418.44	899.074	2.29703	2.54774	55.8541	0
P1_IV_V	TLL1	1690.97	344.57	2.29498	2.5457	34.5375	2.19546e-261
P1_IV_V	TFEC	717.837	146.484	2.29291	2.54362	22.4925	4.91949e-112
P1_IV_V	PLOD2	26059.8	5320.72	2.29213	2.54285	135.507	0
P1_IV_V	CTSZ	91848	18815.3	2.28734	2.53806	254.166	0
P1_IV_V	TMPRSS4	1941.28	398.152	2.28562	2.53633	36.9293	1.5653e-298
P1_IV_V	SLC2A5	5333.32	1094.91	2.28422	2.53493	61.192	0
P1_IV_V	MICB	2021.04	415.259	2.28302	2.53373	37.6587	0
P1_IV_V	ERO1L	13585.4	2791.98	2.28269	2.53341	97.6323	0
P1_IV_V	ZBP1	1452.18	298.526	2.2823	2.53301	31.9167	1.56518e-223
P1_IV_V	TNIP3	156.78	32.3068	2.27883	2.52954	10.4789	1.07946e-25
P1_IV_V	FNDC1	16026.7	3307.96	2.27647	2.52718	105.897	0
P1_IV_V	SH2D1A	253.497	52.384	2.27477	2.52548	13.3127	1.95223e-40
P1_IV_V	PLIN2	58246.2	12043.9	2.27387	2.52458	201.783	0
P1_IV_V	CDCA5	988.236	204.378	2.27361	2.52433	26.2784	3.38291e-152
P1_IV_V	FCER1G	27554.4	5702.38	2.27265	2.52336	138.739	0
P1_IV_V	ASF1B	1860.22	385.088	2.27222	2.52293	36.0427	1.7933e-284
P1_IV_V	CYP27B1	353.56	73.2129	2.27178	2.5225	15.7117	1.25775e-55
P1_IV_V	LAMP3	2625.28	544.172	2.27033	2.52105	42.7997	0
P1_IV_V	CCDC165	2427.47	503.256	2.27009	2.5208	41.1535	0
P1_IV_V	SLAMF6	769.606	159.642	2.26928	2.51999	23.1677	9.6406e-119
P1_IV_V	ETV1	2169.35	450.379	2.26805	2.51876	38.8862	0
P1_IV_V	TRAV12-1	182.678	38.011	2.26481	2.51553	11.2761	1.72294e-29
P1_IV_V	ELOVL3	670.671	140.355	2.25652	2.50724	21.5655	3.78699e-103
P1_IV_V	CD180	1146.8	240.142	2.25566	2.50638	28.1946	6.81633e-175
P1_IV_V	ICAM1	52910.4	11094.3	2.25373	2.50444	191.45	0
P1_IV_V	AL583828.1	194.778	40.8919	2.25194	2.50266	11.6098	3.67464e-31
P1_IV_V	CYTIP	3563.11	748.375	2.2513	2.50202	49.649	0
P1_IV_V	SPOCK1	1708.76	358.915	2.25124	2.50195	34.3818	4.7215e-259
P1_IV_V	ODZ3	3945.91	829.97	2.24923	2.49994	52.2234	0
P1_IV_V	KLK5	1003.36	211.056	2.24914	2.49986	26.3336	7.91998e-153
P1_IV_V	MMP9	5648.85	1191.77	2.24486	2.49557	62.4227	0
P1_IV_V	TGM2	73040.1	15418.7	2.244	2.49472	224.454	0
P1_IV_V	IL1RAP	5293.41	1119.9	2.24083	2.49154	60.3714	0
P1_IV_V	SAMSN1	3588.25	759.806	2.23958	2.49029	49.6912	0
P1_IV_V	FAM157A	312.361	66.4514	2.23284	2.48356	14.6384	1.59773e-48
P1_IV_V	FOXQ1	566.627	120.592	2.23226	2.48298	19.7132	1.66199e-86
P1_IV_V	PTGES	839.253	178.745	2.2312	2.48192	23.9855	3.93956e-127
P1_IV_V	C2orf54	533.063	113.649	2.22972	2.48044	19.1093	2.11457e-81
P1_IV_V	EPGN	180.465	38.5133	2.22829	2.479	11.115	1.06107e-28
P1_IV_V	FN1	1.34416e+06	287023	2.22747	2.47818	962.127	0
P1_IV_V	TRAV21	306.558	65.5852	2.22472	2.47543	14.4747	1.75077e-47
P1_IV_V	KRT18	126470	27060.4	2.22453	2.47525	294.074	0
P1_IV_V	STAP1	169.561	36.2898	2.22416	2.47488	10.7637	5.10932e-27
P1_IV_V	CDKN2B	142.637	30.5803	2.22168	2.47239	9.86655	5.81276e-23
P1_IV_V	GPR171	917.358	196.736	2.22122	2.47194	25.0192	3.77962e-138
P1_IV_V	TMEM171	314.139	67.5087	2.21826	2.46897	14.6307	1.78899e-48
P1_IV_V	KRT5	6242.14	1341.95	2.21771	2.46842	65.2113	0
P1_IV_V	OASL	5382.94	1157.63	2.21722	2.46793	60.5501	0
P1_IV_V	MT1B	148.383	31.9226	2.21667	2.46738	10.0516	9.03626e-24
P1_IV_V	GPR68	955.71	205.706	2.21599	2.46671	25.5059	1.69598e-143
P1_IV_V	DEPDC7	1236.83	266.633	2.21372	2.46443	29.0003	6.51614e-185
P1_IV_V	CD84	1510.7	326.617	2.20954	2.46025	32.0195	5.84026e-225
P1_IV_V	VEPH1	6327.36	1371.38	2.20597	2.45668	65.4757	0
P1_IV_V	SERPINA1	31221.9	6769.4	2.20546	2.45617	145.436	0
P1_IV_V	C7orf10	2458.49	533.649	2.20381	2.45452	40.7924	0
P1_IV_V	SDS	1598	348.53	2.19691	2.44763	32.8345	1.89642e-236
P1_IV_V	FGF11	422.246	92.1822	2.19552	2.44624	16.8726	7.16195e-64
P1_IV_V	BTLA	207.12	45.2932	2.1931	2.44382	11.8103	3.45235e-32
P1_IV_V	CHRNA5	790.213	172.881	2.19246	2.44317	23.0652	1.03527e-117
P1_IV_V	FCGR1B	136.383	29.8502	2.19186	2.44257	9.58083	9.62637e-22
P1_IV_V	SLAMF1	551.584	120.842	2.19045	2.44117	19.2613	1.13542e-82
P1_IV_V	UNC13D	6943.4	1524.15	2.18764	2.43835	68.294	0
P1_IV_V	SEMA7A	6203.6	1362.24	2.18712	2.43783	64.5453	0
P1_IV_V	MYBL1	793.334	174.275	2.18656	2.43727	23.0785	7.6179e-118
P1_IV_V	ECM1	19309.3	4243	2.18614	2.43685	113.851	0
P1_IV_V	CHI3L1	29267.2	6446.53	2.18269	2.4334	140.056	0
P1_IV_V	S100A5	100.375	22.1675	2.17889	2.4296	8.19409	2.52506e-16
P1_IV_V	ISM1	2163.74	478.129	2.17805	2.42876	38.0368	0
P1_IV_V	SERPINE1	106712	23602.5	2.17671	2.42742	267.103	0
P1_IV_V	GABRD	186.299	41.2343	2.1757	2.42642	11.1548	6.7837e-29
P1_IV_V	BRIP1	917.66	203.469	2.17315	2.42386	24.7419	3.78931e-135
P1_IV_V	POU6F2	112.029	24.867	2.17156	2.42228	8.64154	5.54601e-18
P1_IV_V	ASPHD2	646.204	143.471	2.17123	2.42194	20.7528	1.15621e-95
P1_IV_V	ARNTL2	2015.11	447.683	2.17031	2.42102	36.6393	6.77905e-294
P1_IV_V	MATN3	2491.08	554.737	2.1669	2.41761	40.704	0
P1_IV_V	SALL4	866.655	193.356	2.1642	2.41491	23.9929	3.30094e-127
P1_IV_V	SLC9A2	210.572	47.0731	2.16134	2.41206	11.8184	3.13459e-32
P1_IV_V	MMP14	131176	29328.6	2.16112	2.41183	295.053	0
P1_IV_V	PKP3	13150.2	2944.32	2.15908	2.4098	93.3475	0
P1_IV_V	LBX2	117.542	26.3334	2.15821	2.40892	8.8232	1.11231e-18
P1_IV_V	ESM1	522.301	117.039	2.15789	2.4086	18.5976	3.35792e-77
P1_IV_V	LUM	238505	53538.3	2.15537	2.40609	397.403	0
P1_IV_V	NT5DC1	13627.2	3062.17	2.15386	2.40458	94.9054	0
P1_IV_V	BNIP3	16619.9	3745.04	2.14986	2.40057	104.709	0
P1_IV_V	RP11-303O9.2	673.114	151.985	2.14693	2.39764	21.0565	1.99424e-98
P1_IV_V	BUB1	2898.53	654.852	2.14608	2.3968	43.6861	0
P1_IV_V	ANKRD33B	299.692	67.7802	2.14455	2.39526	14.0419	8.63417e-45
P1_IV_V	HIST1H2BJ	992.317	224.692	2.14286	2.39357	25.5409	6.93767e-144
P1_IV_V	MCM10	1084.67	245.874	2.14127	2.39199	26.6927	5.72666e-157
P1_IV_V	PPEF1	209.49	47.4876	2.14126	2.39197	11.7306	8.87976e-32
P1_IV_V	CCNB2	4564.72	1035.31	2.14046	2.39117	54.7477	0
P1_IV_V	CD2	3152.28	715.536	2.1393	2.39001	45.4827	0
P1_IV_V	FRMD6	9303.57	2121.7	2.13257	2.38328	78.0094	0
P1_IV_V	TRAV13-2	169.368	38.6607	2.13122	2.38193	10.5217	6.86513e-26
P1_IV_V	ATP10A	14428.4	3295.28	2.13044	2.38115	97.0976	0
P1_IV_V	NRG1	640.992	146.56	2.12881	2.37953	20.4568	5.22676e-93
P1_IV_V	ETV4	2464.35	563.74	2.12811	2.37882	40.1041	0
P1_IV_V	CXCR6	2064.17	472.521	2.12711	2.37783	36.6947	8.87186e-295
P1_IV_V	FAM54A	431.452	98.8972	2.1252	2.37591	16.7683	4.16129e-63
P1_IV_V	MXRA5	24984.5	5727.3	2.12511	2.37582	127.607	0
P1_IV_V	CYBB	8501.51	1951.98	2.12278	2.3735	74.3908	0
P1_IV_V	RND3	14062.1	3230.09	2.12217	2.37288	95.6614	0
P1_IV_V	GPR84	968.286	222.425	2.12211	2.37283	25.1011	4.83646e-139
P1_IV_V	SNX24	3611.94	830.05	2.12151	2.37222	48.4729	0
P1_IV_V	LAMB3	24600.5	5660.21	2.11976	2.37048	126.455	0
P1_IV_V	KLC3	833.842	192.128	2.11771	2.36842	23.2679	9.3738e-120
P1_IV_V	IQGAP3	3326.19	766.995	2.11658	2.3673	46.459	0
P1_IV_V	TNFSF13B	3553.33	820.135	2.11524	2.36595	48.0031	0
P1_IV_V	KIAA0101	3194.09	737.254	2.11517	2.36588	45.511	0
P1_IV_V	IGLV5-45	524.546	121.1	2.11487	2.36559	18.4417	6.08256e-76
P1_IV_V	ACVR1C	258.12	59.8703	2.10813	2.35884	12.9148	3.71624e-38
P1_IV_V	GZMK	2875.08	666.881	2.1081	2.35882	43.1023	0
P1_IV_V	KLK4	124.467	28.9015	2.10654	2.35726	8.96458	3.1146e-19
P1_IV_V	MAL	4135.29	960.503	2.10613	2.35684	51.6671	0
P1_IV_V	IL2RG	9309.76	2165.64	2.10395	2.35466	77.4817	0
P1_IV_V	C6orf99	243.075	56.604	2.10242	2.35314	12.5148	6.19761e-36
P1_IV_V	PHLDA2	598.281	139.53	2.10024	2.35096	19.6231	9.81742e-86
P1_IV_V	WNT11	6364.12	1484.43	2.10005	2.35077	63.9985	0
P1_IV_V	ULBP2	114.396	26.7147	2.09832	2.34904	8.57648	9.78205e-18
P1_IV_V	FCGR1A	802.851	187.68	2.09686	2.34757	22.7123	3.38415e-114
P1_IV_V	IL21R	822.05	192.278	2.09603	2.34675	22.9775	7.82127e-117
P2_I_II_VI	SCGB3A2	3658.34	3.3036	10.1129	9.80992	50.5521	0
P2_I_II_VI	POU3F4	291.276	0	9.18624	8.88324	15.1669	5.86224e-52
P2_I_II_VI	FGF19	2676.82	5.97758	8.80674	8.50374	47.0058	0
P2_I_II_VI	SPRR1A	161.766	0	8.33776	8.03476	11.8425	2.35408e-32
P2_I_II_VI	OLIG3	476.452	1.5136	8.2982	7.99519	20.363	3.55827e-92
P2_I_II_VI	TFF1	6933.04	25.1719	8.10553	7.80252	78.3793	0
P2_I_II_VI	CARTPT	224.994	0	8.08011	7.7771	14.1358	2.28536e-45
P2_I_II_VI	DPYSL5	12304	46.4782	8.04835	7.74535	104.682	0
P2_I_II_VI	APOA4	4744.92	17.9926	8.04283	7.73983	65.0232	0
P2_I_II_VI	SLC18A3	399.343	1.58822	7.97408	7.67107	18.9202	7.77834e-80
P2_I_II_VI	NCAN	1228.73	5.67067	7.75944	7.45643	33.4819	8.84553e-246
P2_I_II_VI	RFX4	5008.96	25.7496	7.60382	7.30081	67.9996	0
P2_I_II_VI	PGC	7385.81	38.488	7.5842	7.2812	82.6305	0
P2_I_II_VI	CACNG7	1036.07	5.67067	7.51338	7.21037	31.0255	2.44194e-211
P2_I_II_VI	HRH3	1021.37	5.79784	7.46078	7.15777	30.86	4.10696e-209
P2_I_II_VI	STMN4	1511.9	8.59819	7.45811	7.15511	37.5495	0
P2_I_II_VI	IGDCC3	13242.6	75.7047	7.45059	7.14758	111.158	0
P2_I_II_VI	NEUROD4	259.23	1.58822	7.35068	7.04768	15.6027	6.97521e-55
P2_I_II_VI	TMEM132D	2636.3	16.1586	7.35007	7.04707	49.7581	0
P2_I_II_VI	C11orf87	122.412	0	7.33761	7.0346	10.7262	7.66692e-27
P2_I_II_VI	NPY2R	144.916	0	7.33693	7.03392	11.6709	1.79594e-31
P2_I_II_VI	SPRR1B	2022.48	12.734	7.31129	7.00829	43.6345	0
P2_I_II_VI	PCDH8	7248.45	46.9195	7.27134	6.96834	82.7057	0
P2_I_II_VI	FGF17	3099.3	21.2662	7.18724	6.88423	54.2126	0
P2_I_II_VI	CRABP1	34075.2	236.348	7.17166	6.86866	179.838	0
P2_I_II_VI	DBX1	227.533	1.58822	7.16252	6.85952	14.699	6.5429e-49
P2_I_II_VI	ELAVL3	5077.75	36.8619	7.10592	6.80291	69.5446	0
P2_I_II_VI	S100A7	2104.03	15.9368	7.04464	6.74164	44.8368	0
P2_I_II_VI	HOXB9	7689.69	59.5804	7.01194	6.70894	85.7854	0
P2_I_II_VI	DSCR4	962.51	7.46067	7.01135	6.70835	30.3506	2.46847e-202
P2_I_II_VI	SHH	5449.97	42.8195	6.99184	6.68883	72.2546	0
P2_I_II_VI	FGF8	969.971	7.64041	6.98815	6.68514	30.4849	4.12849e-204
P2_I_II_VI	AHSG	2351.48	18.741	6.97123	6.66822	47.4843	0
P2_I_II_VI	FEZF2	904.741	7.36401	6.94087	6.63786	29.4743	6.14504e-191
P2_I_II_VI	ZIC5	675.098	5.9374	6.82912	6.52611	25.5212	1.14682e-143
P2_I_II_VI	SORCS3	3472	30.9468	6.80983	6.50683	57.8994	0
P2_I_II_VI	SFTA3	177.564	1.58822	6.80479	6.50178	13.095	3.51828e-39
P2_I_II_VI	GC	978.801	8.79828	6.79765	6.49464	30.7492	1.25221e-207
P2_I_II_VI	KRTDAP	21618.5	194.399	6.7971	6.49409	144.513	0
P2_I_II_VI	POU3F3	731.422	6.61959	6.78782	6.48481	26.586	9.85572e-156
P2_I_II_VI	NXPH1	276.782	2.5468	6.76392	6.46091	16.3619	3.57971e-60
P2_I_II_VI	WIF1	7057.65	65.6348	6.74858	6.44557	82.6451	0
P2_I_II_VI	STMN2	6334.04	61.2818	6.69153	6.38852	78.3718	0
P2_I_II_VI	SLIT1	19732.3	198.557	6.63486	6.33185	138.454	0
P2_I_II_VI	DSCR8	4955.27	50.5984	6.61373	6.31072	69.4043	0
P2_I_II_VI	SBSN	2001.88	20.8389	6.58593	6.28292	44.1312	0
P2_I_II_VI	DPP10	3250.64	35.1091	6.53274	6.22973	56.2759	0
P2_I_II_VI	PHOX2B	158.305	1.71539	6.52802	6.22502	12.4197	2.04396e-35
P2_I_II_VI	SFTPB	453.798	4.96643	6.5137	6.21069	21.0316	3.37135e-98
P2_I_II_VI	TFAP2B	356.298	3.90494	6.51164	6.20863	18.6362	1.63299e-77
P2_I_II_VI	WFDC5	295.648	3.25104	6.50684	6.20383	16.9772	1.21216e-64
P2_I_II_VI	TAGLN3	5332.65	60.8512	6.45342	6.15042	72.1463	0
P2_I_II_VI	DLX2	1096.04	12.6532	6.43666	6.13365	32.7138	9.93925e-235
P2_I_II_VI	IGF2BP1	8652.3	100.511	6.42766	6.12465	91.9232	0
P2_I_II_VI	PAX1	266.336	3.10182	6.42399	6.12098	16.1283	1.61421e-58
P2_I_II_VI	OLFM4	3561.92	41.8876	6.40999	6.10698	58.9896	0
P2_I_II_VI	SCG3	1949.27	22.9508	6.40824	6.10524	43.6391	0
P2_I_II_VI	VSTM2A	209.68	2.49424	6.39345	6.09044	14.3146	1.77473e-46
P2_I_II_VI	UGT2A1	268.376	3.22275	6.37982	6.07681	16.1966	5.32891e-59
P2_I_II_VI	GBX2	487.905	5.88706	6.37291	6.0699	21.8397	9.74831e-106
P2_I_II_VI	ZIC3	738.03	9.04889	6.34979	6.04679	26.8657	5.53346e-159
P2_I_II_VI	CAMKV	3540.35	43.4131	6.34962	6.04661	58.8417	0
P2_I_II_VI	KCNQ2	1878.9	23.3369	6.33113	6.02812	42.8721	0
P2_I_II_VI	SOX21	401.457	4.98848	6.3305	6.02749	19.8173	2.11156e-87
P2_I_II_VI	CACNG5	118.908	1.5136	6.29571	5.9927	10.7878	3.92947e-27
P2_I_II_VI	SPRR3	3087.41	39.3172	6.29509	5.99209	54.9703	0
P2_I_II_VI	OLIG2	254.05	3.25104	6.28807	5.98506	15.7692	5.06775e-56
P2_I_II_VI	SLC6A15	2604.61	33.8392	6.26623	5.96322	50.4984	0
P2_I_II_VI	IVL	946.892	12.3123	6.26503	5.96202	30.448	1.27197e-203
P2_I_II_VI	TFF2	34158.6	444.944	6.26248	5.95947	182.882	0
P2_I_II_VI	FOXG1	1070.39	14.1951	6.23661	5.9336	32.3775	5.68405e-230
P2_I_II_VI	DCX	1470.49	19.5554	6.23258	5.92958	37.95	0
P2_I_II_VI	TM4SF5	732.36	9.78364	6.22604	5.92303	26.7828	5.12472e-158
P2_I_II_VI	SIX3	1837.8	24.6733	6.21889	5.91588	42.4284	0
P2_I_II_VI	SOX11	6374.05	85.9948	6.21182	5.90881	79.0185	0
P2_I_II_VI	ZIC2	2950.65	39.8976	6.20859	5.90558	53.7632	0
P2_I_II_VI	SLC1A6	549.266	7.42896	6.2082	5.90519	23.1962	4.9693e-119
P2_I_II_VI	C1orf187	1172.99	16.3243	6.16702	5.86402	33.9026	6.10208e-252
P2_I_II_VI	GPR50	1405.37	19.8459	6.14596	5.84296	37.1111	1.86112e-301
P2_I_II_VI	C13orf44	232.308	3.43078	6.08136	5.77835	15.0895	1.89952e-51
P2_I_II_VI	ONECUT1	392.386	5.79784	6.08061	5.77761	19.611	1.24666e-85
P2_I_II_VI	MKRN3	3229.74	48.0118	6.07189	5.76888	56.2635	0
P2_I_II_VI	LRP2	10800.4	161.254	6.06561	5.76261	102.888	0
P2_I_II_VI	TUBB2B	18642	279.601	6.05904	5.75604	135.173	0
P2_I_II_VI	NEUROG2	145.618	2.27041	6.0031	5.70009	11.9459	6.8238e-33
P2_I_II_VI	TTR	6543.85	102.481	5.99671	5.6937	80.0795	0
P2_I_II_VI	MATN4	2332.22	36.602	5.99364	5.69063	47.8063	0
P2_I_II_VI	POTEC	936.639	15.0647	5.95825	5.65524	30.2929	1.42349e-201
P2_I_II_VI	BTBD17	1370.81	22.1973	5.9485	5.64549	36.6461	5.28908e-294
P2_I_II_VI	CASP14	283.024	4.61542	5.93832	5.63531	16.6507	2.99163e-62
P2_I_II_VI	LIN28A	534.41	8.72215	5.93712	5.63411	22.88	7.35199e-116
P2_I_II_VI	ELF5	244.405	4.06041	5.91151	5.6085	15.4711	5.43396e-54
P2_I_II_VI	DKK1	2998.9	49.8772	5.90991	5.6069	54.1933	0
P2_I_II_VI	VGF	528.97	8.95837	5.88381	5.5808	22.7571	1.22009e-114
P2_I_II_VI	HIST1H4L	248.025	4.20963	5.88065	5.57764	15.5826	9.55414e-55
P2_I_II_VI	NXF2B	254.771	4.32714	5.87964	5.57664	15.793	3.47427e-56
P2_I_II_VI	LECT1	1840.94	31.4313	5.8721	5.56909	42.4513	0
P2_I_II_VI	DLEU7	248.599	4.24628	5.87148	5.56847	15.5998	7.30358e-55
P2_I_II_VI	CCNYL2	4207.14	72.5771	5.85718	5.55418	64.1686	0
P2_I_II_VI	GSX2	192.018	3.31599	5.85566	5.55265	13.7086	9.01236e-43
P2_I_II_VI	UGT2A3	144.323	2.49424	5.85456	5.55155	11.8847	1.42128e-32
P2_I_II_VI	UPK1A	2959.72	51.337	5.84932	5.54631	53.8184	0
P2_I_II_VI	LGALS7B	287.41	5.03138	5.83601	5.53301	16.7693	4.09535e-63
P2_I_II_VI	ELAVL4	1625.16	28.74	5.82138	5.51837	39.8716	0
P2_I_II_VI	DLX6	2241.72	39.8474	5.81398	5.51097	46.8252	0
P2_I_II_VI	LHX2	388.011	6.96044	5.80077	5.49777	19.4788	1.66123e-84
P2_I_II_VI	C14orf23	178.719	3.22275	5.79326	5.49025	13.219	6.81955e-40
P2_I_II_VI	C7orf65	182.599	3.3036	5.7885	5.48549	13.3611	1.02017e-40
P2_I_II_VI	ATP1A3	6440.96	117.489	5.77668	5.47367	79.3456	0
P2_I_II_VI	C1orf61	591.967	10.8942	5.76389	5.46088	24.0515	8.06012e-128
P2_I_II_VI	AFM	1066.99	19.6965	5.75947	5.45646	32.289	9.9978e-229
P2_I_II_VI	TBX5	817.081	15.1055	5.75733	5.45432	28.2551	1.23161e-175
P2_I_II_VI	CA14	15099.5	279.843	5.75374	5.45073	121.46	0
P2_I_II_VI	GPR98	20374.7	378.951	5.74862	5.44562	141.083	0
P2_I_II_VI	KIF5A	3611.33	67.8904	5.73318	5.43017	59.3867	0
P2_I_II_VI	SLITRK1	1168.75	22.0139	5.7304	5.4274	33.7833	3.47227e-250
P2_I_II_VI	ELAVL2	2118.83	39.9308	5.72962	5.42662	45.4869	0
P2_I_II_VI	WNT3A	570.308	10.8066	5.72176	5.41875	23.5969	4.15038e-123
P2_I_II_VI	BARX1	359.006	6.81171	5.71985	5.41684	18.7215	3.30471e-78
P2_I_II_VI	SEPT3	3056.35	59.3384	5.6867	5.38369	54.6036	0
P2_I_II_VI	MPPED1	469.827	9.21271	5.67236	5.36935	21.4047	1.20817e-101
P2_I_II_VI	NKX2-1	255.592	5.01899	5.6703	5.3673	15.7871	3.81754e-56
P2_I_II_VI	LIN28B	576.195	11.3498	5.66582	5.36281	23.7021	3.42627e-124
P2_I_II_VI	CNTNAP5	1303.24	25.8738	5.65447	5.35146	35.641	3.25079e-278
P2_I_II_VI	HMP19	766.244	15.4323	5.63378	5.33078	27.3209	2.39367e-164
P2_I_II_VI	GRIA1	2333.67	47.3832	5.62208	5.31908	47.6714	0
P2_I_II_VI	NKX6-1	363.266	7.44699	5.60822	5.30522	18.8044	6.94695e-79
P2_I_II_VI	FGF3	123.26	2.5468	5.59687	5.29387	10.9517	6.5185e-28
P2_I_II_VI	MYT1	2302.36	47.9453	5.58558	5.28257	47.324	0
P2_I_II_VI	GAD2	757.127	15.8053	5.58205	5.27905	27.1365	3.65125e-162
P2_I_II_VI	GAD1	3056.5	64.2848	5.57126	5.26825	54.5138	0
P2_I_II_VI	FABP1	577.522	12.3021	5.55289	5.24989	23.6888	4.70377e-124
P2_I_II_VI	DLX1	1567.35	33.6674	5.54083	5.23782	39.0167	0
P2_I_II_VI	PTH2R	11070.1	240.608	5.52384	5.22083	103.661	0
P2_I_II_VI	AC133561.1	305.522	6.66863	5.51774	5.21473	17.219	1.91327e-66
P2_I_II_VI	DLX4	588.114	12.8608	5.51504	5.21203	23.8889	3.99817e-126
P2_I_II_VI	PANX3	228.883	5.01899	5.51107	5.20806	14.9018	3.20774e-50
P2_I_II_VI	CYP26A1	1562.51	34.2811	5.51031	5.2073	38.9348	0
P2_I_II_VI	ZNF536	4693.42	103.197	5.50716	5.20416	67.4756	0
P2_I_II_VI	NELL1	3886.78	86.7581	5.48543	5.18243	61.3783	0
P2_I_II_VI	PNLIPRP2	322.638	7.25889	5.47402	5.17102	17.6798	5.99826e-70
P2_I_II_VI	KRT1	5667.65	127.708	5.47183	5.16882	74.0976	0
P2_I_II_VI	KIRREL2	3452.35	78.1417	5.46534	5.16233	57.8232	0
P2_I_II_VI	TTC9B	146.299	3.31599	5.46333	5.16033	11.9027	1.14546e-32
P2_I_II_VI	ZIC1	11767.4	268.221	5.45523	5.15222	106.732	0
P2_I_II_VI	RP11-209K10.3	138.995	3.17643	5.45148	5.14847	11.5989	4.17215e-31
P2_I_II_VI	HOXA11	305.501	7.03505	5.44047	5.13747	17.1919	3.05149e-66
P2_I_II_VI	KRT6B	262.502	6.18128	5.40828	5.10527	15.9249	4.25451e-57
P2_I_II_VI	NOG	653.467	15.4496	5.40247	5.09947	25.1227	2.81224e-139
P2_I_II_VI	FAM57B	1355.39	32.0796	5.40091	5.0979	36.1802	1.24805e-286
P2_I_II_VI	AMBN	144.856	3.44316	5.39474	5.09173	11.8262	2.85879e-32
P2_I_II_VI	GLP1R	517.181	12.3745	5.38522	5.08222	22.341	1.47829e-110
P2_I_II_VI	GNG13	134.774	3.22899	5.38332	5.08031	11.4042	3.9847e-30
P2_I_II_VI	CNTNAP4	1311.01	31.6922	5.37041	5.0674	35.5575	6.35908e-277
P2_I_II_VI	APOC3	690.441	16.9066	5.35186	5.04885	25.7925	1.075e-146
P2_I_II_VI	LHX8	298.252	7.30743	5.35103	5.04802	16.9517	1.86912e-64
P2_I_II_VI	GABRA3	571.285	14.1425	5.3361	5.0331	23.4523	1.25184e-121
P2_I_II_VI	DPF1	4146.1	103.659	5.32184	5.01883	63.1569	0
P2_I_II_VI	GJB6	1265.4	31.8255	5.31327	5.01026	34.8833	1.33137e-266
P2_I_II_VI	TMEM145	1808.03	45.6599	5.30734	5.00434	41.6906	0
P2_I_II_VI	VSTM2B	167.951	4.24901	5.30477	5.00177	12.7057	5.50092e-37
P2_I_II_VI	OTOA	579.641	14.9104	5.28077	4.97776	23.5886	5.04703e-123
P2_I_II_VI	SALL4	7456.75	193.356	5.26921	4.96621	84.5784	0
P2_I_II_VI	ATP12A	603.362	15.6804	5.26599	4.96299	24.0565	7.13872e-128
P2_I_II_VI	FAM3D	844.274	22.0916	5.25614	4.95313	28.4488	5.04528e-178
P2_I_II_VI	MAST1	3693.37	97.428	5.24446	4.94145	59.4823	0
P2_I_II_VI	NCCRP1	771.048	20.4019	5.24004	4.93704	27.1744	1.30307e-162
P2_I_II_VI	HOXC11	185.775	4.9319	5.23527	4.93227	13.3368	1.41333e-40
P2_I_II_VI	KRT6C	125.341	3.36855	5.21759	4.91458	10.9491	6.71425e-28
P2_I_II_VI	TMEFF2	2430.72	65.9731	5.20336	4.90036	48.1958	0
P2_I_II_VI	PAK7	678.157	18.4524	5.19974	4.89673	25.4541	6.35868e-143
P2_I_II_VI	FOXH1	417.602	11.4057	5.1943	4.8913	19.9711	9.8355e-89
P2_I_II_VI	CLDN2	1020.21	28.0795	5.18321	4.8802	31.2043	9.32403e-214
P2_I_II_VI	FBN3	17459.3	488.588	5.15924	4.85623	128.989	0
P2_I_II_VI	APLP1	21700	613.073	5.14549	4.84248	143.739	0
P2_I_II_VI	IGLON5	3069.97	86.9608	5.14172	4.83871	54.0569	0
P2_I_II_VI	PPY	145.579	4.12535	5.14114	4.83813	11.7713	5.48994e-32
P2_I_II_VI	OC90	317.148	8.99632	5.13968	4.83667	17.3734	1.31314e-67
P2_I_II_VI	EFCAB8	1202.16	34.6846	5.11519	4.81218	33.7965	2.21805e-250
P2_I_II_VI	NPW	718.815	20.8672	5.10631	4.80331	26.1256	1.86605e-150
P2_I_II_VI	ADM2	394.157	11.6248	5.08349	4.78049	19.3304	2.97862e-83
P2_I_II_VI	CDH18	3243.27	95.8769	5.08012	4.77712	55.443	0
P2_I_II_VI	EMILIN3	6694.15	198.269	5.07737	4.77437	79.6454	0
P2_I_II_VI	LY6D	307.864	9.12572	5.07621	4.7732	17.0794	2.11358e-65
P2_I_II_VI	ATP4A	782.098	23.1914	5.07569	4.77268	27.2217	3.59549e-163
P2_I_II_VI	OTX2	1812.44	53.9559	5.07001	4.767	41.4311	0
P2_I_II_VI	ADAMTS20	621.213	18.4995	5.06953	4.76652	24.2553	5.80677e-130
P2_I_II_VI	ABP1	6788.5	202.197	5.06926	4.76625	80.1811	0
P2_I_II_VI	HOXB13	133.523	3.97955	5.06834	4.76533	11.2447	2.46046e-29
P2_I_II_VI	C21orf90	1187.63	35.5227	5.0632	4.76019	33.5295	1.79262e-246
P2_I_II_VI	SELV	1708.44	51.2417	5.05921	4.75621	40.2089	0
P2_I_II_VI	NR2E1	131.413	4.08246	5.00853	4.70552	11.1302	8.94341e-29
P2_I_II_VI	SLCO6A1	460.578	14.3346	5.00587	4.70287	20.8349	2.09101e-96
P2_I_II_VI	GABRA1	163.158	5.08394	5.00418	4.70118	12.3998	2.61979e-35
P2_I_II_VI	KIF1A	26116.7	825.955	4.98276	4.67976	156.749	0
P2_I_II_VI	NEUROD1	566.515	17.9327	4.98145	4.67844	23.0845	6.61985e-118
P2_I_II_VI	GPR19	2470.71	78.7616	4.97129	4.66828	48.189	0
P2_I_II_VI	SLITRK6	3474.64	111.334	4.96389	4.66089	57.1294	0
P2_I_II_VI	CBLN2	606.606	19.5721	4.95389	4.65088	23.8604	7.90333e-126
P2_I_II_VI	CDH10	677.646	22.2835	4.92649	4.62348	25.1896	5.2072e-140
P2_I_II_VI	SP7	366	12.1373	4.91432	4.61132	18.5026	1.96892e-76
P2_I_II_VI	CNTN2	1206.97	40.1609	4.90945	4.60644	33.5928	2.13479e-247
P2_I_II_VI	ST8SIA2	1313.32	43.9077	4.9026	4.5996	35.0311	7.56972e-269
P2_I_II_VI	VAX1	168.024	5.64862	4.89462	4.59162	12.5256	5.40548e-36
P2_I_II_VI	PNPLA5	128.967	4.33952	4.89332	4.59031	10.9731	5.14995e-28
P2_I_II_VI	C2orf82	290.858	9.79945	4.89147	4.58846	16.4776	5.31598e-61
P2_I_II_VI	ISL1	306.697	10.3787	4.88511	4.5821	16.9155	3.46049e-64
P2_I_II_VI	FAM83C	265.977	9.02684	4.88094	4.57793	15.7496	6.91066e-56
P2_I_II_VI	WNT1	149.805	5.09905	4.87671	4.57371	11.8176	3.16782e-32
P2_I_II_VI	FGFBP3	1183.13	40.3005	4.87567	4.57267	33.2094	7.86446e-242
P2_I_II_VI	IL13RA2	1780.1	60.6512	4.87528	4.57227	40.7342	0
P2_I_II_VI	MGAT5B	1948.45	66.5126	4.87256	4.56955	42.6116	0
P2_I_II_VI	SOX2	5602.72	191.546	4.87036	4.56736	72.2505	0
P2_I_II_VI	CPA6	170.085	5.85655	4.86006	4.55706	12.5825	2.63515e-36
P2_I_II_VI	COL2A1	49564.5	1707.02	4.85976	4.55675	214.798	0
P2_I_II_VI	PCDHB6	4241.43	146.121	4.85932	4.55631	62.8314	0
P2_I_II_VI	SIM2	7836.49	270.836	4.85472	4.55171	85.3866	0
P2_I_II_VI	NEFM	9075.93	313.788	4.85418	4.55118	91.8892	0
P2_I_II_VI	CA10	674.999	23.3989	4.85037	4.54736	25.0548	1.54933e-138
P2_I_II_VI	HIST1H4F	2112.18	73.3369	4.84805	4.54504	44.3157	0
P2_I_II_VI	CYP2W1	7098.51	247.822	4.84014	4.53714	81.2113	0
P2_I_II_VI	DLX3	805.191	28.3262	4.82912	4.52611	27.3371	1.53537e-164
P2_I_II_VI	CELSR3	12378.5	436.997	4.82407	4.52107	107.161	0
P2_I_II_VI	GDF10	2336.52	82.5797	4.82243	4.51943	46.5533	0
P2_I_II_VI	PNLIPRP1	111.88	3.97955	4.8132	4.5102	10.1823	2.37771e-24
P2_I_II_VI	GAB4	417.021	14.9015	4.80659	4.50358	19.6522	5.53812e-86
P2_I_II_VI	COLEC10	191.892	6.88905	4.79985	4.49684	13.3265	1.62264e-40
P2_I_II_VI	HIST1H2BM	563.836	20.2561	4.79885	4.49584	22.8425	1.73449e-115
P2_I_II_VI	DLL3	3736.77	135.177	4.78887	4.48586	58.7763	0
P2_I_II_VI	CUX2	1885.31	68.4936	4.78269	4.47968	41.736	0
P2_I_II_VI	LIM2	113.293	4.15707	4.76835	4.46535	10.2237	1.5527e-24
P2_I_II_VI	HJURP	14515.4	539.593	4.74957	4.44656	115.614	0
P2_I_II_VI	CLVS2	150.32	5.59606	4.74748	4.44447	11.7639	5.99109e-32
P2_I_II_VI	CCDC150	5696.53	212.4	4.74523	4.44222	72.41	0
P2_I_II_VI	SULT1E1	884.058	33.0226	4.74261	4.43961	28.5216	6.32651e-179
P2_I_II_VI	SERPINB3	613.888	23.007	4.73783	4.43482	23.7613	8.40358e-125
P2_I_II_VI	ST8SIA3	248.191	9.30323	4.73758	4.43457	15.1082	1.43029e-51
P2_I_II_VI	COL9A3	7622.93	286.728	4.73259	4.42958	83.7084	0
P2_I_II_VI	SCRT1	128.003	4.83926	4.72525	4.42224	10.843	2.15375e-27
P2_I_II_VI	FGF11	2434.46	92.1822	4.72297	4.41997	47.2812	0
P2_I_II_VI	RHCG	1253.45	47.5406	4.7206	4.4176	33.9223	3.12436e-252
P2_I_II_VI	NKAIN4	10503.5	402.634	4.70526	4.40225	98.1173	0
P2_I_II_VI	ILDR2	1919.41	73.7197	4.70247	4.39947	41.9367	0
P2_I_II_VI	ASCL1	596.852	22.9571	4.70036	4.39736	23.3826	6.42266e-121
P2_I_II_VI	NRXN1	1168.41	45.0125	4.69808	4.39507	32.7117	1.06371e-234
P2_I_II_VI	TFAP2A	4477.48	172.576	4.69738	4.39438	64.0336	0
P2_I_II_VI	CACNA1E	3659.35	141.123	4.69656	4.39356	57.886	0
P2_I_II_VI	NKX6-2	129.178	4.98848	4.69462	4.39161	10.8747	1.52073e-27
P2_I_II_VI	ZNF695	3829.59	148.051	4.69302	4.39001	59.2057	0
P2_I_II_VI	C19orf77	1198.08	46.3983	4.69051	4.3875	33.1108	2.07642e-240
P2_I_II_VI	CTCFL	2093.88	81.7455	4.67889	4.37589	43.7448	0
P2_I_II_VI	C10orf99	412.368	16.129	4.67621	4.3732	19.4101	6.33749e-84
P2_I_II_VI	UNC5D	1045.91	40.9325	4.67536	4.37236	30.9109	8.51782e-210
P2_I_II_VI	DQX1	613.47	24.1199	4.6687	4.36569	23.6647	8.32939e-124
P2_I_II_VI	SPINK1	15833.3	623.568	4.66627	4.36326	120.209	0
P2_I_II_VI	CYP2C19	139.447	5.49316	4.66594	4.36293	11.2809	1.63152e-29
P2_I_II_VI	EPYC	671.134	26.4736	4.66398	4.36097	24.7454	3.47472e-135
P2_I_II_VI	FAT3	8145.82	321.814	4.66176	4.35875	86.1997	0
P2_I_II_VI	RCOR2	9454.39	374.626	4.65746	4.35445	92.8433	0
P2_I_II_VI	P2RX3	1348.69	53.7824	4.64828	4.34527	35.0478	4.20664e-269
P2_I_II_VI	TRIM71	1298.6	51.7921	4.64808	4.34507	34.3904	3.50976e-259
P2_I_II_VI	KCNJ6	466.165	18.6087	4.64679	4.34379	20.6034	2.56041e-94
P2_I_II_VI	ACTL6B	364.451	14.5703	4.64462	4.34161	18.2152	3.90908e-74
P2_I_II_VI	KCNK10	319.281	12.7885	4.64191	4.3389	17.0464	3.71508e-65
P2_I_II_VI	SLC39A5	3048.03	122.265	4.63979	4.33678	52.6629	0
P2_I_II_VI	KRT14	3255.16	131.779	4.62653	4.32352	54.3813	0
P2_I_II_VI	TUBB3	33209.1	1353.3	4.61702	4.31402	173.605	0
P2_I_II_VI	SIX6	318.548	13.0126	4.61353	4.31052	16.9989	8.36874e-65
P2_I_II_VI	C10orf91	140.07	5.73502	4.61021	4.3072	11.2699	1.84709e-29
P2_I_II_VI	ERN2	1293.65	53.1176	4.60611	4.30311	34.2414	5.84698e-257
P2_I_II_VI	WNT7A	4773.82	197.217	4.59729	4.29428	65.7432	0
P2_I_II_VI	TPX2	29778.9	1233.16	4.59386	4.29086	164.169	0
P2_I_II_VI	BMP7	32310	1341.87	4.58966	4.28666	170.961	0
P2_I_II_VI	CARD17	106.337	4.41685	4.58947	4.28647	9.8074	1.04626e-22
P2_I_II_VI	KRT16	1482.61	61.6718	4.58739	4.28438	36.6162	1.58054e-293
P2_I_II_VI	CERS3	299.827	12.5384	4.57971	4.2767	16.4586	7.27663e-61
P2_I_II_VI	ODAM	117.931	4.9319	4.57966	4.27665	10.3222	5.59505e-25
P2_I_II_VI	CRYM	1832.24	76.6275	4.5796	4.27659	40.6861	0
P2_I_II_VI	KHDRBS2	715.909	29.9718	4.5781	4.27509	25.4299	1.17942e-142
P2_I_II_VI	KRT6A	3449.16	144.792	4.57419	4.27119	55.8046	0
P2_I_II_VI	EMID2	2620.33	110.561	4.56683	4.26382	48.6178	0
P2_I_II_VI	IRX1	156.719	6.61265	4.5668	4.2638	11.8898	1.33648e-32
P2_I_II_VI	CELF3	2299.09	97.3267	4.56208	4.25908	45.527	0
P2_I_II_VI	ZBTB8B	916.03	38.8731	4.55855	4.25555	28.731	1.56432e-181
P2_I_II_VI	KIF14	3528.97	150.39	4.55246	4.24946	56.3712	0
P2_I_II_VI	FSTL5	444.278	18.9475	4.55138	4.24837	20	5.50543e-89
P2_I_II_VI	CENPF	23534.3	1003.76	4.55127	4.24827	145.566	0
P2_I_II_VI	CBX2	4026.1	172.142	4.54771	4.24471	60.1932	0
P2_I_II_VI	KRT13	10826.4	463.869	4.54469	4.24168	98.6886	0
P2_I_II_VI	KIF15	6173.53	265.053	4.54175	4.23874	74.5094	0
P2_I_II_VI	NNAT	13638.3	587.108	4.5379	4.23489	110.719	0
P2_I_II_VI	SERPINB4	159.437	6.87314	4.53587	4.23286	11.9695	5.13368e-33
P2_I_II_VI	HIST1H3I	286.178	12.3885	4.52983	4.22683	16.03	7.88486e-58
P2_I_II_VI	ESM1	2691.19	117.039	4.52318	4.22018	49.1367	0
P2_I_II_VI	SERPINB12	189.865	8.33498	4.50965	4.20665	13.0401	7.24064e-39
P2_I_II_VI	PLA2G3	206.773	9.09178	4.50734	4.20433	13.6062	3.67657e-42
P2_I_II_VI	CLDN6	8063.22	354.895	4.50589	4.20289	84.9588	0
P2_I_II_VI	SP5	545.779	24.0645	4.50334	4.20033	22.0998	3.17715e-108
P2_I_II_VI	MMP1	1557.61	69.0853	4.49482	4.19181	37.3138	9.81395e-305
P2_I_II_VI	SYT14	647.942	28.7496	4.49425	4.19125	24.0653	5.77605e-128
P2_I_II_VI	DEPDC1B	4267.88	189.419	4.49387	4.19086	61.7618	0
P2_I_II_VI	HIST1H2AI	260.867	11.5862	4.49283	4.18982	15.2683	1.24306e-52
P2_I_II_VI	HOXD11	186.522	8.30669	4.48893	4.18592	12.9073	4.09174e-38
P2_I_II_VI	MYH8	10168.5	453.115	4.48809	4.18508	95.2972	0
P2_I_II_VI	BIRC7	490.329	21.8865	4.48564	4.18263	20.9229	3.31596e-97
P2_I_II_VI	HOXB8	5542.27	247.895	4.48268	4.17967	70.3297	0
P2_I_II_VI	DLX5	12148.8	549.11	4.46757	4.16457	104.023	0
P2_I_II_VI	PAX6	1021.01	46.2249	4.46518	4.16218	30.1511	1.0369e-199
P2_I_II_VI	CCKAR	126.313	5.72323	4.46403	4.16103	10.6042	2.8483e-26
P2_I_II_VI	INSM1	235.525	10.7546	4.45285	4.14985	14.4692	1.89535e-47
P2_I_II_VI	HIST1H2AL	527.629	24.4065	4.43419	4.13118	21.6291	9.56152e-104
P2_I_II_VI	CTNNA2	10417.5	482.957	4.43096	4.12796	96.0865	0
P2_I_II_VI	APOA2	968.887	45.0109	4.42798	4.12498	29.2971	1.12827e-188
P2_I_II_VI	MMP13	260.932	12.1553	4.42401	4.12101	15.1996	3.55675e-52
P2_I_II_VI	HIST1H2BH	1839.72	85.9611	4.41966	4.11665	40.3472	0
P2_I_II_VI	RP11-240B13.2	326.21	15.2525	4.41868	4.11568	16.9886	9.98007e-65
P2_I_II_VI	EXO1	5170.48	242.02	4.4171	4.11409	67.6281	0
P2_I_II_VI	C12orf53	1554.93	72.94	4.41399	4.11099	37.0784	6.26017e-301
P2_I_II_VI	GNGT1	195.924	9.21836	4.40964	4.10663	13.1576	1.5391e-39
P2_I_II_VI	HMGA2	6513.07	306.659	4.40863	4.10563	75.8574	0
P2_I_II_VI	BRDT	3964.19	187.877	4.39916	4.09616	59.1413	0
P2_I_II_VI	RP11-445F12.2	1016.56	48.7213	4.383	4.07999	29.9143	1.28407e-196
P2_I_II_VI	NXPH4	1571.94	75.3974	4.38189	4.07888	37.196	7.92851e-303
P2_I_II_VI	FREM2	8831.54	423.663	4.38168	4.07867	88.1641	0
P2_I_II_VI	TERT	274.325	13.2082	4.37639	4.07338	15.5324	2.09492e-54
P2_I_II_VI	DDX25	4804.26	231.381	4.37597	4.07296	64.999	0
P2_I_II_VI	KCNH5	199.834	9.63442	4.37446	4.07146	13.255	4.2221e-40
P2_I_II_VI	LRRTM4	868.69	41.9125	4.37339	4.07038	27.634	4.34913e-168
P2_I_II_VI	GAL3ST3	842.871	40.6938	4.37243	4.06943	27.2183	3.94203e-163
P2_I_II_VI	TOP2A	35720.3	1734.13	4.36446	4.06146	177.093	0
P2_I_II_VI	C2orf48	561.975	27.3298	4.36196	4.05895	22.2079	2.87894e-109
P2_I_II_VI	GABBR2	609.622	29.804	4.35434	4.05133	23.1173	3.10089e-118
P2_I_II_VI	KRT78	510.479	24.9733	4.35339	4.05038	21.1527	2.60607e-99
P2_I_II_VI	LBX2	535.965	26.3334	4.34717	4.04417	21.6644	4.4506e-104
P2_I_II_VI	SLC13A2	133.081	6.5471	4.34531	4.0423	10.7938	3.68084e-27
P2_I_II_VI	HIST1H2BF	841.994	41.4475	4.34445	4.04145	27.1484	2.64344e-162
P2_I_II_VI	FGFR3	8823.7	437.254	4.33484	4.03183	87.8229	0
P2_I_II_VI	MEGF10	3306.68	163.981	4.33379	4.03078	53.7579	0
P2_I_II_VI	SPSB4	693.402	34.4032	4.33308	4.03007	24.6158	8.5486e-134
P2_I_II_VI	ST18	450.034	22.3455	4.33198	4.02897	19.8294	1.66096e-87
P2_I_II_VI	RAB39	425.173	21.1202	4.33136	4.02835	19.273	9.05762e-83
P2_I_II_VI	HTR2C	257.578	12.8634	4.32367	4.02066	14.9923	8.24063e-51
P2_I_II_VI	IGFBPL1	927.171	46.4095	4.32034	4.01734	28.4371	7.02984e-178
P2_I_II_VI	C2orf85	140.131	7.03505	4.31608	4.01307	11.0518	2.14867e-28
P2_I_II_VI	NCAPH	8075.02	406.374	4.31259	4.00958	83.8736	0
P2_I_II_VI	FEZF1	197.161	9.9232	4.31243	4.00942	13.1056	3.06009e-39
P2_I_II_VI	HIST1H1A	246.692	12.419	4.31209	4.00909	14.6592	1.17582e-48
P2_I_II_VI	CTSE	1588.61	80.6473	4.3	3.99699	37.1656	2.45499e-302
P2_I_II_VI	GDF5	543.996	27.6263	4.29948	3.99648	21.7477	7.26736e-105
P2_I_II_VI	AMBP	857.485	43.5623	4.29896	3.99595	27.303	3.9053e-164
P2_I_II_VI	HAPLN1	1414.45	72.0632	4.29484	3.99183	35.0553	3.23287e-269
P2_I_II_VI	GLDC	2351.58	119.829	4.29458	3.99158	45.1993	0
P2_I_II_VI	CALB1	1293.73	65.9681	4.29363	3.99062	33.5229	2.23859e-246
P2_I_II_VI	AC120114.1	542.542	27.8236	4.28535	3.98235	21.6948	2.29503e-104
P2_I_II_VI	GDF5OS	151.399	7.78813	4.28093	3.97793	11.4565	2.18185e-30
P2_I_II_VI	MCM10	4768.06	245.874	4.27741	3.97441	64.2752	0
P2_I_II_VI	KRT77	174.576	9.02684	4.27349	3.97048	12.295	9.63369e-35
P2_I_II_VI	SYT4	611.941	31.6508	4.27308	3.97007	23.0185	3.04026e-117
P2_I_II_VI	CCDC144NL	312.188	16.1613	4.2718	3.9688	16.4394	9.98227e-61
P2_I_II_VI	PCDHB2	9700.96	502.403	4.27121	3.9682	91.6369	0
P2_I_II_VI	LRRC16B	3273.44	169.679	4.26993	3.96692	53.2254	0
P2_I_II_VI	PRAME	87804.3	4573.39	4.26296	3.95995	275.531	0
P2_I_II_VI	TSPEAR	4126.69	215.646	4.25825	3.95524	59.7057	0
P2_I_II_VI	DBC1	2468.4	129.044	4.25764	3.95464	46.1744	0
P2_I_II_VI	SOSTDC1	2953.47	154.725	4.25464	3.95163	50.4959	0
P2_I_II_VI	ISL2	139.141	7.2894	4.2546	3.9516	10.9601	5.94223e-28
P2_I_II_VI	SYCP2L	3424.71	179.697	4.25234	3.94934	54.3654	0
P2_I_II_VI	MKI67	18591.5	976.169	4.25136	3.94836	126.66	0
P2_I_II_VI	A4GNT	767.642	40.3382	4.25021	3.94721	25.7344	4.8151e-146
P2_I_II_VI	UHRF1	2643.9	139.394	4.24543	3.94242	47.7411	0
P2_I_II_VI	KIF18B	5500.54	290.055	4.24517	3.94217	68.8596	0
P2_I_II_VI	RP11-566K11.2	35067.2	1852.22	4.24279	3.93979	173.837	0
P2_I_II_VI	BUB1	12384.7	654.852	4.24125	3.93824	103.293	0
P2_I_II_VI	GPR158	865.713	45.8974	4.23741	3.9344	27.3008	4.15385e-164
P2_I_II_VI	HIST1H2AM	894.602	47.9242	4.22242	3.91941	27.7187	4.15325e-169
P2_I_II_VI	PRTG	9261.06	496.52	4.22126	3.91825	89.1766	0
P2_I_II_VI	IGF2-AS	668.083	35.9973	4.21407	3.91106	23.9373	1.25232e-126
P2_I_II_VI	PCP4	2120.29	115.175	4.20236	3.89935	42.6027	0
P2_I_II_VI	GNG3	823.465	44.8598	4.19821	3.89521	26.5407	3.29034e-155
P2_I_II_VI	MS4A15	108.539	5.91535	4.1976	3.8946	9.63518	5.67939e-22
P2_I_II_VI	LRRTM1	5665.62	310.406	4.19001	3.887	69.5692	0
P2_I_II_VI	XKR7	263.516	14.4521	4.18854	3.88553	15.0017	7.15497e-51
P2_I_II_VI	ASPM	10555.6	580.459	4.18467	3.88166	94.9165	0
P2_I_II_VI	LRRC7	768.782	42.2847	4.18437	3.88136	25.6145	1.05067e-144
P2_I_II_VI	DSG3	359.875	19.7966	4.18418	3.88117	17.5248	9.26265e-69
P2_I_II_VI	AC011443.1	199.921	11.0213	4.18106	3.87805	13.0585	5.68595e-39
P2_I_II_VI	UBE2C	42963.8	2369.19	4.18065	3.87765	191.434	0
P2_I_II_VI	F2RL2	3003.92	166.035	4.17729	3.87428	50.6023	0
P2_I_II_VI	SLC35F1	609.641	33.7191	4.17632	3.87331	22.7943	5.22233e-115
P2_I_II_VI	CARD18	217.089	12.0077	4.17625	3.87325	13.6021	3.89174e-42
P2_I_II_VI	LHX5	106.447	5.91535	4.16952	3.86651	9.51927	1.74408e-21
P2_I_II_VI	FOXL1	328.66	18.3	4.16668	3.86368	16.7227	8.96056e-63
P2_I_II_VI	AFP	3296.03	183.642	4.16576	3.86275	52.9536	0
P2_I_II_VI	NTM	4182.45	233.406	4.16343	3.86043	59.6387	0
P2_I_II_VI	SPRR2A	167.593	9.35579	4.16296	3.85995	11.9377	7.52498e-33
P2_I_II_VI	CDC25A	4096.34	229.778	4.15602	3.85302	58.984	0
P2_I_II_VI	NUF2	4679.49	262.6	4.15541	3.85241	63.0396	0
P2_I_II_VI	SYT13	842.99	47.3602	4.15377	3.85076	26.7523	1.1597e-157
P2_I_II_VI	DNMT3L	175.953	9.90457	4.15095	3.84795	12.2192	2.45462e-34
P2_I_II_VI	MYO16	3396.34	191.53	4.14833	3.84533	53.6726	0
P2_I_II_VI	ONECUT2	190.67	10.8133	4.1402	3.83719	12.7081	5.33421e-37
P2_I_II_VI	FOXB1	309.041	17.5543	4.1379	3.8349	16.1756	7.50215e-59
P2_I_II_VI	IGF2BP3	4362.95	247.93	4.1373	3.83429	60.7743	0
P2_I_II_VI	CHRNB2	437.497	24.8707	4.13675	3.83375	19.244	1.58547e-82
P2_I_II_VI	CKAP2L	4628.91	263.793	4.13319	3.83019	62.5768	0
P2_I_II_VI	QRFPR	179.308	10.2578	4.12765	3.82464	12.3101	7.99561e-35
P2_I_II_VI	SLC18A1	204.574	11.7658	4.11996	3.81695	13.1398	1.94638e-39
P2_I_II_VI	GPC2	6318.16	365.482	4.11163	3.80863	72.9694	0
P2_I_II_VI	CDCA2	4735.88	274.167	4.11051	3.8075	63.1687	0
P2_I_II_VI	POU4F1	173.224	10.0402	4.10878	3.80577	12.0792	1.36112e-33
P2_I_II_VI	GINS1	3341.62	193.948	4.1068	3.80379	53.0438	0
P2_I_II_VI	TMEM169	1386.5	80.4877	4.10653	3.80353	34.1668	7.52067e-256
P2_I_II_VI	GDAP1L1	2721.39	158.404	4.10266	3.79965	47.8509	0
P2_I_II_VI	SLCO1A2	945.773	55.0921	4.10158	3.79857	28.2062	4.90229e-175
P2_I_II_VI	KIF11	10557.3	615.855	4.09951	3.7965	94.2219	0
P2_I_II_VI	NPY	1662.15	97.0676	4.09792	3.79491	37.3804	8.13698e-306
P2_I_II_VI	NEK2	4766.03	278.664	4.09619	3.79319	63.288	0
P2_I_II_VI	COL11A2	6400.94	374.45	4.09544	3.79243	73.3391	0
P2_I_II_VI	TMPRSS15	123.632	7.23684	4.09455	3.79154	10.1916	2.16214e-24
P2_I_II_VI	MYCN	9319.11	546.936	4.09075	3.78774	88.4541	0
P2_I_II_VI	GJD4	285.537	16.7896	4.08804	3.78503	15.4793	4.7888e-54
P2_I_II_VI	PCDH15	872.969	51.3614	4.08717	3.78417	27.0636	2.64376e-161
P2_I_II_VI	C16orf59	3365.71	198.246	4.08555	3.78254	53.1326	0
P2_I_II_VI	ESPL1	11070.7	652.943	4.08365	3.78064	96.347	0
P2_I_II_VI	SYNPR	139.924	8.26461	4.08156	3.77855	10.8295	2.49429e-27
P2_I_II_VI	PRL	704.227	41.6174	4.08078	3.77777	24.2934	2.3002e-130
P2_I_II_VI	FAM72A	125.638	7.42484	4.08077	3.77776	10.2611	1.05541e-24
P2_I_II_VI	UPK2	14028.6	831.269	4.07692	3.77391	108.391	0
P2_I_II_VI	PTPRD	14036.6	832.086	4.07632	3.77331	108.416	0
P2_I_II_VI	AMH	1320.08	78.2811	4.07582	3.77281	33.2457	2.35683e-242
P2_I_II_VI	ANKLE1	2447.4	145.213	4.07501	3.772	45.2643	0
P2_I_II_VI	TTBK1	623.414	36.9995	4.07461	3.77161	22.8442	1.66973e-115
P2_I_II_VI	SHISA9	319.376	18.9598	4.07424	3.77123	16.3502	4.33494e-60
P2_I_II_VI	CNTN6	989.702	58.7938	4.07326	3.77025	28.7796	3.8571e-182
P2_I_II_VI	HIST1H1D	1646.34	98.024	4.06998	3.76697	37.1075	2.12464e-301
P2_I_II_VI	CDCA7	5526.03	330.409	4.06392	3.76091	67.9466	0
P2_I_II_VI	MEX3A	7948.23	475.602	4.06281	3.7598	81.4802	0
P2_I_II_VI	NT5DC4	717.564	42.9832	4.06126	3.75826	24.4784	2.51199e-132
P2_I_II_VI	HIST1H3F	323.344	19.3999	4.05895	3.75594	16.4282	1.20106e-60
P2_I_II_VI	FGB	452.738	27.1746	4.05835	3.75534	19.4383	3.66306e-84
P2_I_II_VI	NKD2	4811.06	288.92	4.05761	3.75461	63.3617	0
P2_I_II_VI	CDH4	4664.82	280.527	4.05561	3.7526	62.3797	0
P2_I_II_VI	MYBL2	18798.4	1131.9	4.05379	3.75078	125.204	0
P2_I_II_VI	UGT3A2	693.477	41.8121	4.05186	3.74885	24.0429	9.89803e-128
P2_I_II_VI	KRT4	23115.2	1394.5	4.05102	3.74802	138.802	0
P2_I_II_VI	SLC24A2	187.463	11.3802	4.042	3.739	12.489	8.5745e-36
P2_I_II_VI	TLL2	2158.48	131.118	4.04108	3.73807	42.3747	0
P2_I_II_VI	ALB	4475.86	272.349	4.03864	3.73563	61.006	0
P2_I_II_VI	EPHA7	3645.62	223.473	4.02799	3.72499	55.0023	0
P2_I_II_VI	RP11-35N6.1	256.766	15.8145	4.02114	3.71813	14.5874	3.37704e-48
P2_I_II_VI	PLK1	14714.2	907.79	4.01871	3.7157	110.404	0
P2_I_II_VI	PTPRZ1	3440.46	213.285	4.01175	3.70874	53.3492	0
P2_I_II_VI	CLDN19	278.181	17.3313	4.00457	3.70157	15.1594	6.56991e-52
P2_I_II_VI	COL23A1	1273.85	79.3969	4.00397	3.70096	32.4378	8.06143e-231
P2_I_II_VI	MSI1	7023.18	437.844	4.00363	3.70063	76.1636	0
P2_I_II_VI	PDIA2	2138.05	133.737	3.99883	3.69582	42.0034	0
P2_I_II_VI	A1CF	232.467	14.6692	3.98616	3.68315	13.833	1.61061e-43
P2_I_II_VI	GRIK3	586.5	37.0885	3.98309	3.68008	21.9655	6.16401e-107
P2_I_II_VI	C6orf174	1434.75	90.9552	3.9795	3.6765	34.3433	1.77583e-258
P2_I_II_VI	LPPR5	132.309	8.41926	3.97408	3.67107	10.4235	1.93652e-25
P2_I_II_VI	HPN	6193.55	395.001	3.97084	3.66783	71.2939	0
P2_I_II_VI	AC020907.3	5482.6	349.727	3.97056	3.66755	67.0754	0
P2_I_II_VI	HELLS	12082.9	771.447	3.96926	3.66625	99.5641	0
P2_I_II_VI	SMR3B	129.738	8.3212	3.96267	3.65966	10.31	6.34791e-25
P2_I_II_VI	SALL1	18328.6	1175.9	3.96225	3.65924	122.541	0
P2_I_II_VI	HEATR7B1	876.552	56.3044	3.96052	3.65751	26.793	3.89464e-158
P2_I_II_VI	VIL1	2288.75	147.069	3.96	3.65699	43.2922	0
P2_I_II_VI	PAX3	1377.89	88.5516	3.9598	3.6568	33.59	2.34695e-247
P2_I_II_VI	PTCHD2	875.19	56.4644	3.95418	3.65118	26.7552	1.0741e-157
P2_I_II_VI	C11orf41	1636.84	106.237	3.94556	3.64255	36.558	1.32832e-292
P2_I_II_VI	MEST	71319.1	4632.11	3.94455	3.64154	241.307	0
P2_I_II_VI	LYPD2	8258.84	539.003	3.93757	3.63457	82.0521	0
P2_I_II_VI	HIST1H2BE	369.529	24.1701	3.93439	3.63138	17.3504	1.9586e-67
P2_I_II_VI	SLC32A1	425.32	27.9043	3.92999	3.62698	18.6058	2.88364e-77
P2_I_II_VI	KRT15	5014.42	329.557	3.92748	3.62448	63.8691	0
P2_I_II_VI	FOXN4	342.346	22.5287	3.92562	3.62261	16.6851	1.68332e-62
P2_I_II_VI	TNFSF11	207.504	13.6606	3.92505	3.62204	12.9892	1.40862e-38
P2_I_II_VI	ANKS4B	111.719	7.36401	3.92324	3.62023	9.52912	1.58616e-21
P2_I_II_VI	KREMEN2	1563.26	103.161	3.92159	3.61858	35.6394	3.4337e-278
P2_I_II_VI	FAM83D	11078.4	732.809	3.91816	3.61516	94.8429	0
P2_I_II_VI	TOX3	3845.05	254.382	3.91793	3.61493	55.8733	0
P2_I_II_VI	CYP27C1	1407.24	93.6223	3.90987	3.60687	33.7733	4.87145e-250
P2_I_II_VI	CHAT	200.191	13.4154	3.89941	3.59641	12.7244	4.32903e-37
P2_I_II_VI	HIST1H3D	906.691	61.0227	3.89319	3.59019	27.0621	2.75557e-161
P2_I_II_VI	POU3F2	173.308	11.7035	3.88833	3.58532	11.8255	2.88342e-32
P2_I_II_VI	STRA6	9170.24	622.56	3.88068	3.57767	85.9509	0
P2_I_II_VI	GP2	142.401	9.72141	3.87265	3.56965	10.7014	1.00216e-26
P2_I_II_VI	PPP1R29	332.18	22.6968	3.8714	3.5684	16.3423	4.9346e-60
P2_I_II_VI	NTNG1	1456.61	99.631	3.86988	3.56687	34.2159	1.40166e-256
P2_I_II_VI	BUB1B	8527.68	583.353	3.86971	3.5667	82.788	0
P2_I_II_VI	CDK1	17194.9	1178.29	3.86722	3.56421	117.528	0
P2_I_II_VI	HIST1H2AD	810.351	55.6292	3.86463	3.56162	25.5063	1.67624e-143
P2_I_II_VI	NTSR1	355.987	24.4693	3.86278	3.55977	16.9022	4.33793e-64
P2_I_II_VI	SCN8A	2766.37	190.409	3.86082	3.55781	47.1074	0
P2_I_II_VI	SEZ6L	655.332	45.1954	3.85798	3.55497	22.9209	2.87858e-116
P2_I_II_VI	PCDHB17	312.578	21.5778	3.8566	3.55359	15.8276	2.00773e-56
P2_I_II_VI	CSPG5	2029.7	140.372	3.85394	3.55093	40.3206	0
P2_I_II_VI	PADI3	253.578	17.5472	3.85312	3.55011	14.2504	4.45547e-46
P2_I_II_VI	PRSS8	13132.3	909.811	3.85141	3.54841	102.534	0
P2_I_II_VI	FAM171A2	10631.8	737.079	3.85042	3.54742	92.2472	0
P2_I_II_VI	AURKB	9244.32	641.835	3.84829	3.54529	85.9975	0
P2_I_II_VI	SULT2B1	1308.08	91.0228	3.84508	3.54207	32.3377	2.06281e-229
P2_I_II_VI	BTBD11	1847.16	128.73	3.84288	3.53988	38.4185	0
P2_I_II_VI	GABRG3	1020.54	71.3366	3.83854	3.53553	28.5428	3.45363e-179
P2_I_II_VI	NPHS1	732.901	51.2592	3.83774	3.53473	24.1861	3.11305e-129
P2_I_II_VI	AC010336.1	5825.87	408.735	3.83324	3.53023	68.1572	0
P2_I_II_VI	BRIP1	2884.96	203.469	3.82567	3.52266	47.9223	0
P2_I_II_VI	C1QL1	1457.64	102.899	3.82433	3.52133	34.0587	3.01739e-254
P2_I_II_VI	CYP2C18	117.598	8.31635	3.82177	3.51877	9.67119	3.99702e-22
P2_I_II_VI	ZNF492	273.205	19.3315	3.82096	3.51796	14.7396	3.59091e-49
P2_I_II_VI	FGF9	2854.03	202.389	3.8178	3.51479	47.6231	0
P2_I_II_VI	EME1	2832.54	201.016	3.81671	3.51371	47.4378	0
P2_I_II_VI	CTNND2	2807.73	199.44	3.81538	3.51237	47.2225	0
P2_I_II_VI	GJD2	215.525	15.3237	3.81402	3.51101	13.0814	4.20721e-39
P2_I_II_VI	DCC	2079.47	147.916	3.81337	3.51036	40.6303	0
P2_I_II_VI	CPB2	149.461	10.6532	3.81041	3.5074	10.8891	1.29856e-27
P2_I_II_VI	ZNF98	507.894	36.2358	3.80904	3.50603	20.0701	1.3474e-89
P2_I_II_VI	BPIFB4	157.088	11.2313	3.80598	3.50297	11.158	6.54713e-29
P2_I_II_VI	PLAC1	1124.01	80.5056	3.80342	3.50042	29.8384	1.24263e-195
P2_I_II_VI	RNFT2	4311.25	308.788	3.80342	3.50041	58.4376	0
P2_I_II_VI	SKA3	2505.21	179.939	3.79935	3.49634	44.526	0
P2_I_II_VI	MYH3	54043.2	3884.41	3.79835	3.49534	206.794	0
P2_I_II_VI	TRIM15	116.774	8.39721	3.79767	3.49466	9.61127	7.16573e-22
P2_I_II_VI	PAX7	817.11	58.8459	3.79552	3.49251	25.4181	1.59141e-142
P2_I_II_VI	POU6F2	345.146	24.867	3.7949	3.49189	16.5186	2.69597e-61
P2_I_II_VI	PCSK2	2449.23	176.52	3.79442	3.49142	44.0012	0
P2_I_II_VI	CCDC144C	1244.08	89.7574	3.79291	3.4899	31.3545	8.45755e-216
P2_I_II_VI	ARHGAP11B	894.546	64.6158	3.7912	3.48819	26.5822	1.0891e-155
P2_I_II_VI	ZIC4	971.947	70.2142	3.79104	3.48804	27.7079	5.60516e-169
P2_I_II_VI	TTK	3329.47	240.925	3.78864	3.48563	51.2688	0
P2_I_II_VI	LIX1	1563.67	113.497	3.78421	3.4812	35.1171	3.70245e-270
P2_I_II_VI	DACH1	12004.6	871.6	3.78378	3.48077	97.2978	0
P2_I_II_VI	TLX1	152.851	11.1237	3.78041	3.47741	10.9747	5.05966e-28
P2_I_II_VI	ERC2	2581.33	188.698	3.77396	3.47096	45.067	0
P2_I_II_VI	DSCAM	434.508	31.8274	3.77104	3.46804	18.4837	2.79303e-76
P2_I_II_VI	TFR2	833.817	61.195	3.76824	3.46524	25.5968	1.65592e-144
P2_I_II_VI	SCUBE3	8812.45	646.899	3.76793	3.46492	83.2122	0
P2_I_II_VI	HIST1H2BO	638.012	46.9127	3.76553	3.46252	22.3835	5.69437e-111
P2_I_II_VI	TROAP	11587	852.771	3.76421	3.4612	95.376	0
P2_I_II_VI	ORC6	4205.61	309.613	3.76378	3.46077	57.4569	0
P2_I_II_VI	RP1-177G6.2	620.279	45.9561	3.75459	3.45158	22.0423	1.13284e-107
P2_I_II_VI	KCNS1	228.282	16.9291	3.75324	3.45024	13.37	9.05598e-41
P2_I_II_VI	PDE11A	779.96	57.9009	3.75174	3.44874	24.709	8.55699e-135
P2_I_II_VI	ZYG11A	904.433	67.2391	3.74964	3.44663	26.6012	6.57902e-156
P2_I_II_VI	LIPK	100.966	7.51323	3.74829	3.44528	8.88651	6.30592e-19
P2_I_II_VI	HIST1H3J	404.604	30.1175	3.74784	3.44483	17.7884	8.69716e-71
P2_I_II_VI	RTKN2	2223.34	165.859	3.7447	3.4417	41.6836	0
P2_I_II_VI	MAP2	13299.9	995.045	3.74051	3.4375	101.901	0
P2_I_II_VI	SOX8	548.831	41.0779	3.73993	3.43692	20.6984	3.57924e-95
P2_I_II_VI	P2RX2	771.638	57.8334	3.73795	3.43494	24.5371	5.93696e-133
P2_I_II_VI	SRRM4	136.235	10.2115	3.73783	3.43483	10.3099	6.35592e-25
P2_I_II_VI	ESCO2	1778.06	133.302	3.73753	3.43453	37.2451	1.27412e-303
P2_I_II_VI	HIST1H2AH	203.821	15.287	3.73693	3.43392	12.6092	1.87777e-36
P2_I_II_VI	TMEM132B	1561.61	117.36	3.73402	3.43101	34.89	1.05296e-266
P2_I_II_VI	DNA2	6381.28	479.71	3.73361	3.4306	70.5263	0
P2_I_II_VI	LHX1	5937.42	446.92	3.73175	3.42874	68.0143	0
P2_I_II_VI	LGI1	1533.1	115.458	3.73101	3.42801	34.5578	1.08718e-261
P2_I_II_VI	TMEM8C	1029.17	77.592	3.72942	3.42642	28.3088	2.69001e-176
P2_I_II_VI	PCDH20	1158.99	87.6397	3.72514	3.42213	30.026	4.49081e-198
P2_I_II_VI	DTL	5666.98	428.71	3.72451	3.4215	66.3902	0
P2_I_II_VI	ELOVL2	1197.78	90.7902	3.72168	3.41868	30.5118	1.81584e-204
P2_I_II_VI	NRG1	1932.19	146.56	3.72067	3.41767	38.7483	0
P2_I_II_VI	EDAR	435.583	33.0851	3.71869	3.41569	18.3933	1.48649e-75
P2_I_II_VI	GALNT13	1311.36	99.7358	3.71681	3.41381	31.9072	2.12212e-223
P2_I_II_VI	CCDC42	166.348	12.6546	3.71647	3.41347	11.3636	6.34379e-30
P2_I_II_VI	SGOL1	3308.34	251.762	3.71597	3.41297	50.6745	0
P2_I_II_VI	RP11-144F15.1	5689.71	433.587	3.71396	3.41095	66.4394	0
P2_I_II_VI	WDR87	619.968	47.3981	3.70929	3.40629	21.9189	1.71404e-106
P2_I_II_VI	PI3	8819.84	675.689	3.70632	3.40332	82.6445	0
P2_I_II_VI	GABRA2	215.788	16.545	3.70514	3.40214	12.925	3.2526e-38
P2_I_II_VI	SPRR2G	137.736	10.5625	3.70489	3.40188	10.3259	5.38001e-25
P2_I_II_VI	FZD2	19936.7	1529.36	3.70443	3.40142	124.227	0
P2_I_II_VI	APCDD1L	438.078	33.6418	3.70286	3.39985	18.4108	1.07548e-75
P2_I_II_VI	SVOP	163.658	12.5932	3.69997	3.39696	11.249	2.34202e-29
P2_I_II_VI	TUBB4A	1839.01	141.588	3.69916	3.39615	37.7048	0
P2_I_II_VI	AC112502.1	460.414	35.5402	3.69541	3.3924	18.8573	2.55763e-79
P2_I_II_VI	SHOX2	460.414	35.5402	3.69541	3.3924	18.8573	2.55763e-79
P2_I_II_VI	HIST1H3B	425.322	32.8406	3.695	3.39199	18.1235	2.07764e-73
P2_I_II_VI	DIAPH3	4574.47	353.331	3.69451	3.3915	59.4334	0
P2_I_II_VI	NKAIN1	1346.04	104.278	3.69022	3.38722	32.2227	8.50024e-228
P2_I_II_VI	AGXT	145.065	11.2447	3.68938	3.38638	10.5771	3.80361e-26
P2_I_II_VI	CDK5R2	118.787	9.22862	3.68612	3.38311	9.56751	1.09514e-21
P2_I_II_VI	ODZ2	2353.21	183.575	3.68018	3.37718	42.5529	0
P2_I_II_VI	DNMT3B	4537.18	354.29	3.67879	3.37578	59.0771	0
P2_I_II_VI	CEACAM5	211.144	16.4951	3.67812	3.37511	12.7432	3.4029e-37
P2_I_II_VI	FBN2	34884.7	2725.29	3.67811	3.37511	163.803	0
P2_I_II_VI	ACCN4	383.263	29.9929	3.67564	3.37263	17.1634	4.98799e-66
P2_I_II_VI	DMRT1	155.946	12.2153	3.67429	3.37128	10.9464	6.91601e-28
P2_I_II_VI	CDC25C	2495.74	195.772	3.67222	3.36921	43.7797	0
P2_I_II_VI	GABRQ	401.132	31.4658	3.67222	3.36921	17.5516	5.78723e-69
P2_I_II_VI	KANK4	2087.06	163.936	3.67027	3.36726	40.0254	0
P2_I_II_VI	GFAP	648.681	50.9694	3.66981	3.3668	22.313	2.76156e-110
P2_I_II_VI	NLRP2	12494.5	982.518	3.66866	3.36566	97.9143	0
P2_I_II_VI	TMSB15A	2185.52	171.967	3.66777	3.36476	40.946	0
P2_I_II_VI	DKKL1	572.595	45.069	3.66731	3.3643	20.9572	1.61452e-97
P2_I_II_VI	ZNF280A	358.372	28.3073	3.66222	3.35921	16.5692	1.16421e-61
P2_I_II_VI	SBK1	3435.75	271.827	3.65986	3.35686	51.2884	0
P2_I_II_VI	GSG2	2541.97	201.32	3.65838	3.35538	44.1076	0
P2_I_II_VI	PKP1	1241.96	98.615	3.65466	3.35166	30.8161	1.59272e-208
P2_I_II_VI	CENPA	1915.4	152.801	3.64792	3.34491	38.2373	0
P2_I_II_VI	MSX1	7081.25	565.062	3.64752	3.34452	73.5181	0
P2_I_II_VI	GREM2	312.623	24.9474	3.64747	3.34446	15.447	7.90849e-54
P2_I_II_VI	PROC	1196.22	95.8273	3.6419	3.3389	30.195	2.75654e-200
P2_I_II_VI	HAPLN4	293.997	23.6343	3.63685	3.33384	14.9597	1.34664e-50
P2_I_II_VI	GRIN2B	257.833	20.7745	3.63355	3.33055	14.0036	1.48239e-44
P2_I_II_VI	HOXA9	660.052	53.4715	3.62574	3.32273	22.3834	5.71017e-111
P2_I_II_VI	ACRV1	492.892	39.9521	3.62493	3.32192	19.3405	2.45002e-83
P2_I_II_VI	OPRK1	195.046	15.8318	3.62292	3.31991	12.1632	4.87954e-34
P2_I_II_VI	CHRNA4	435.002	35.3092	3.62291	3.3199	18.1646	9.84486e-74
P2_I_II_VI	KCNK4	165.472	13.4714	3.61861	3.31561	11.197	4.2163e-29
P2_I_II_VI	IL17B	2761.38	224.94	3.61777	3.31477	45.736	0
P2_I_II_VI	TOX	3082.38	252.315	3.61075	3.30774	48.2777	0
P2_I_II_VI	SP9	219.005	17.94	3.60971	3.30671	12.8668	6.92042e-38
P2_I_II_VI	HSD17B2	2187.12	179.4	3.60778	3.30478	40.6511	0
P2_I_II_VI	TDRD12	1976.27	162.12	3.60765	3.30464	38.6413	0
P2_I_II_VI	RP11-758M4.1	130.535	10.75	3.60203	3.29902	9.92371	3.28317e-23
P2_I_II_VI	GTSE1	5181.14	426.704	3.60196	3.29896	62.5205	0
P2_I_II_VI	GUCA1A	198.766	16.372	3.60177	3.29876	12.2453	1.78087e-34
P2_I_II_VI	MADCAM1	249.255	20.5603	3.59969	3.29668	13.7089	8.98654e-43
P2_I_II_VI	HIST3H2A	1804.39	148.952	3.5986	3.29559	36.8794	9.8913e-298
P2_I_II_VI	TWIST1	3440.15	284.016	3.59843	3.29542	50.9212	0
P2_I_II_VI	VANGL2	12228.6	1011.22	3.59609	3.29308	95.9776	0
P2_I_II_VI	SLC39A12	275.845	22.8323	3.59471	3.2917	14.4122	4.33664e-47
P2_I_II_VI	XKR9	2387.26	197.614	3.5946	3.29159	42.3977	0
P2_I_II_VI	IGF2	67186.8	5561.65	3.59459	3.29159	224.941	0
P2_I_II_VI	CHRNA5	2077.37	172.881	3.5869	3.2839	39.5104	0
P2_I_II_VI	CALN1	152.262	12.6734	3.58668	3.28367	10.6964	1.05848e-26
P2_I_II_VI	LRRN1	34691.1	2889.09	3.58588	3.28287	161.444	0
P2_I_II_VI	ZNF729	236.783	19.723	3.58562	3.28261	13.3369	1.41126e-40
P2_I_II_VI	FBXO43	1159.81	96.6627	3.58478	3.28178	29.5139	1.91059e-191
P2_I_II_VI	E2F7	2442.97	203.654	3.58444	3.28143	42.8325	0
P2_I_II_VI	DRD1	467.429	38.9695	3.58433	3.28132	18.7355	2.54363e-78
P2_I_II_VI	RHBDL1	1750.99	146.114	3.58301	3.28001	36.2556	8.11166e-288
P2_I_II_VI	NOL4	277.886	23.2001	3.58229	3.27929	14.4419	2.82025e-47
P2_I_II_VI	CDC20	10111.9	846.021	3.57922	3.27621	87.0836	0
P2_I_II_VI	HIST2H2AB	348.109	29.2333	3.57385	3.27084	16.146	1.2124e-58
P2_I_II_VI	CHEK1	6145.23	516.229	3.57338	3.27038	67.8347	0
P2_I_II_VI	BLM	3918.72	329.235	3.57319	3.27019	54.168	0
P2_I_II_VI	SST	1166.7	98.2113	3.5704	3.26739	29.5452	7.57191e-192
P2_I_II_VI	HAVCR1	312.157	26.2971	3.56929	3.26629	15.2802	1.03557e-52
P2_I_II_VI	SLC10A4	377.31	31.8698	3.56549	3.26248	16.7909	2.8458e-63
P2_I_II_VI	GABRR1	177.683	15.0319	3.5632	3.2602	11.519	1.05838e-30
P2_I_II_VI	ODZ3	9768.31	829.97	3.55698	3.25397	85.3385	0
P2_I_II_VI	VAT1L	1050.48	89.2638	3.55683	3.25382	27.9844	2.51487e-172
P2_I_II_VI	FSD1	2940.55	250.071	3.55568	3.25267	46.8133	0
P2_I_II_VI	SPAG5	18403.1	1574.95	3.54657	3.24356	116.971	0
P2_I_II_VI	AGTR2	1442.96	123.695	3.54417	3.24116	32.7423	3.91355e-235
P2_I_II_VI	MAGEL2	3948.23	339.323	3.54047	3.23747	54.1336	0
P2_I_II_VI	PRSS3	613.883	52.7972	3.53943	3.23642	21.3425	4.57735e-101
P2_I_II_VI	CAPNS2	286.423	24.7092	3.53503	3.23202	14.5696	4.38733e-48
P2_I_II_VI	HOXC10	2923.05	252.574	3.5327	3.22969	46.5291	0
P2_I_II_VI	FAM135B	292.642	25.2892	3.53254	3.22953	14.7219	4.66471e-49
P2_I_II_VI	SERPINA4	659.788	57.0256	3.53232	3.22931	22.1047	2.84805e-108
P2_I_II_VI	BRSK2	2496.63	216.345	3.52858	3.22557	42.9772	0
P2_I_II_VI	KIF2C	8272.55	717.075	3.52814	3.22513	78.2273	0
P2_I_II_VI	ZWINT	12094.9	1050.14	3.52574	3.22274	94.5583	0
P2_I_II_VI	MYO1A	711.281	61.8963	3.52249	3.21949	22.9202	2.91921e-116
P2_I_II_VI	SPC25	3045.14	265.05	3.52217	3.21917	47.4225	0
P2_I_II_VI	EDN3	3823.29	333.27	3.52005	3.21704	53.1219	0
P2_I_II_VI	GINS2	4962.64	432.639	3.51987	3.21686	60.5202	0
P2_I_II_VI	ARHGAP40	955.457	83.5651	3.51522	3.21221	26.5381	3.52617e-155
P2_I_II_VI	FOXC2	1739.24	152.391	3.51261	3.2096	35.7921	1.46538e-280
P2_I_II_VI	SCEL	2314.23	202.87	3.51191	3.2089	41.2828	0
P2_I_II_VI	DPYSL4	4951.29	434.221	3.5113	3.2083	60.3796	0
P2_I_II_VI	CYP26C1	114.026	10.0565	3.50316	3.20016	9.1525	5.56303e-20
P2_I_II_VI	POLQ	2542.14	224.423	3.50175	3.19874	43.2069	0
P2_I_II_VI	AL513013.1	286.71	25.3222	3.50112	3.19811	14.5089	1.0636e-47
P2_I_II_VI	E2F1	6787.3	600.368	3.49892	3.19591	70.5721	0
P2_I_II_VI	IQGAP3	8657.39	766.995	3.49664	3.19364	79.6784	0
P2_I_II_VI	GDPD2	1445.11	128.067	3.49621	3.1932	32.5512	2.01308e-232
P2_I_II_VI	CHRM2	155.777	13.8132	3.49537	3.19236	10.686	1.18307e-26
P2_I_II_VI	WDR62	12648.7	1122.42	3.4943	3.19129	96.2786	0
P2_I_II_VI	EPS8L3	698.552	62.0707	3.49238	3.18938	22.6195	2.78598e-113
P2_I_II_VI	C8orf73	1665.52	148.033	3.49197	3.18897	34.9248	3.12765e-267
P2_I_II_VI	KIFC1	12149.1	1080.15	3.49155	3.18854	94.3214	0
P2_I_II_VI	FSTL4	848.204	75.4469	3.49088	3.18787	24.9197	4.55571e-137
P2_I_II_VI	CLUL1	3834.95	341.783	3.48806	3.18505	52.9665	0
P2_I_II_VI	PCSK1N	988.744	88.2597	3.48577	3.18276	26.8857	3.2239e-159
P2_I_II_VI	HS6ST3	303.323	27.0762	3.48576	3.18275	14.8913	3.75508e-50
P2_I_II_VI	KIF26B	4606.67	412.03	3.4829	3.17989	58.0096	0
P2_I_II_VI	TBR1	134.451	12.0577	3.47906	3.17605	9.90491	3.96337e-23
P2_I_II_VI	BAI3	933.303	83.7868	3.47755	3.17454	26.0908	4.63959e-150
P2_I_II_VI	CCNB2	11531.4	1035.31	3.47743	3.17442	91.7095	0
P2_I_II_VI	CDCA5	2269.61	204.378	3.47313	3.17012	40.6611	0
P2_I_II_VI	RIPPLY2	167.367	15.0763	3.47266	3.16965	11.041	2.42267e-28
P2_I_II_VI	CENPE	2845.21	257.183	3.46767	3.16466	45.4908	0
P2_I_II_VI	ZNF670	5645.8	514.158	3.45689	3.15389	63.9824	0
P2_I_II_VI	TMEM132E	1260.37	114.861	3.4559	3.15289	30.2262	1.07387e-200
P2_I_II_VI	CDCA8	1918.45	175.172	3.4531	3.15009	37.2764	3.9655e-304
P2_I_II_VI	INA	2410.67	220.225	3.45238	3.14938	41.7814	0
P2_I_II_VI	HIST1H4I	222.258	20.348	3.44927	3.14627	12.6808	7.55713e-37
P2_I_II_VI	SPRED3	615.995	56.4408	3.44811	3.1451	21.1073	6.81364e-99
P2_I_II_VI	OLFM3	561.728	51.5087	3.44698	3.14398	20.1529	2.53985e-90
P2_I_II_VI	PAPPA2	1192.02	109.614	3.4429	3.1399	29.34	3.2087e-189
P2_I_II_VI	ORC1	2885.03	265.626	3.44112	3.13811	45.6332	0
P2_I_II_VI	SPOCK3	959.654	88.5141	3.43854	3.13553	26.3087	1.52646e-152
P2_I_II_VI	GREM1	301.866	27.8574	3.43778	3.13477	14.7537	2.91407e-49
P2_V_VII	PDCL2	172.61	0	7.69774	8.01368	13.6352	2.47216e-42
P2_V_VII	DPEP3	28347.1	172.964	7.35659	7.67253	177.488	0
P2_V_VII	MAGEA11	2280.91	14.9541	7.25292	7.56887	50.5659	0
P2_V_VII	DQX1	2957.84	24.1199	6.93818	7.25412	58.2817	0
P2_V_VII	EPYC	3217.33	26.4736	6.92517	7.24111	60.8125	0
P2_V_VII	OR56B4	258.088	2.41963	6.73693	7.05287	17.3322	2.68629e-67
P2_V_VII	VSTM2B	431.22	4.24901	6.66515	6.9811	22.4533	1.18865e-111
P2_V_VII	CRYGC	173.288	1.71539	6.65849	6.97443	14.2364	5.44382e-46
P2_V_VII	CRYGB	122.409	1.58822	6.26816	6.5841	12.0861	1.25064e-33
P2_V_VII	IGKV1D-13	173.18	2.40937	6.16748	6.48342	14.405	4.8112e-47
P2_V_VII	CTCFL	5825.33	81.7455	6.15505	6.471	83.5658	0
P2_V_VII	CLDN6	24144.3	354.895	6.08815	6.40409	170.334	0
P2_V_VII	DMBX1	236.512	3.93323	5.91006	6.226	16.9032	4.25977e-64
P2_V_VII	PRSS21	13142.9	229.303	5.84089	6.15683	126.109	0
P2_V_VII	HEATR7B1	3215.43	56.3044	5.83562	6.15156	62.3794	0
P2_V_VII	P2RX2	3193.57	57.8334	5.78712	6.10306	62.1974	0
P2_V_VII	SHISA9	994.369	18.9598	5.71276	6.02871	34.728	2.97972e-264
P2_V_VII	EVPLL	207.022	4.02587	5.68434	6.00028	15.849	1.42949e-56
P2_V_VII	IGHV1-58	1516.58	32.1866	5.55821	5.87415	42.923	0
P2_V_VII	WNT7A	9073.77	197.217	5.52384	5.83979	105.001	0
P2_V_VII	RP11-445F12.2	2157.47	48.7213	5.46864	5.78459	51.2034	0
P2_V_VII	MUC5AC	285.129	6.60721	5.43143	5.74737	18.6142	2.46582e-77
P2_V_VII	LGALS7B	214.481	5.03138	5.41375	5.72969	16.144	1.25253e-58
P2_V_VII	SLC35D3	137.632	3.22899	5.41359	5.72953	12.9323	2.95936e-38
P2_V_VII	NPBWR2	174.108	4.20963	5.37014	5.68609	14.5442	6.36084e-48
P2_V_VII	LRRTM1	12758	310.406	5.3611	5.67704	124.498	0
P2_V_VII	NPY	3944.18	97.0676	5.34459	5.66053	69.2191	0
P2_V_VII	IGFL2	5899.47	146.459	5.33202	5.64796	84.6517	0
P2_V_VII	SLC6A15	1361.31	33.8392	5.33016	5.6461	40.6633	0
P2_V_VII	NCCRP1	800.095	20.4019	5.2934	5.60934	31.1691	2.79342e-213
P2_V_VII	KIF1A	32211.5	825.955	5.28537	5.60131	197.767	0
P2_V_VII	AQP5	8215.79	216.189	5.24804	5.56398	99.8547	0
P2_V_VII	IGHJ2	130.323	3.45555	5.23704	5.55298	12.5754	2.88486e-36
P2_V_VII	AC087645.1	300.677	8.28514	5.18154	5.49748	19.093	2.88822e-81
[truncated: 1,261 more rows]

## Sheet: diff_expressed
Supplementary table 6. Number of differentially expressed
genes per sample compared to reference pool
Sample	No. of diff. expressed genes
	compared to all other samples
P1_I1	1193
P1_I2	1089
P1_I3	1197
P1_II1	1111
P1_II2	1171
P1_II3	1191
P1_IV1	1123
P1_IV2	1147
P1_IV3	1125
P1_V1	1147
P2_I1	1285
P2_I2	1129
P2_I4	1273
P2_I5	1217
P2_II2	1165
P2_III1	1111
P2_V1	1187
P2_VI1	1111
P2_VI2	1267
P2_VI3	1029
P2_VII1	1037
P2_VII2	1235
P2_VII3	1035
P3_I	1178
P3_II	947
P3_III	1074
P3_IV	1247
P3_V	1118
P3_VI	1311
P3_VII	1089
P3_VIII	1417

## Sheet: PWenrichment_vs_ref
Supplementary table 6. Differential expression of cellular pathways for branches in patient 1 and patient 2 based on Cytoscape analysis. P1_I_II: samples p1.I-1, p1.I-2, p1.II-1, p1.II-2; P1_IV_V: samples p1.IV-1, p1.IV-2, p1.IV-3, p1.V-1; p2_I_II_VI: samples p2.I-1, p2.I-2, p2.II-2, p2.IV-1, p2.IV-2, p2.IV-3; P2_V_VII: samples p2.V-1, p2.VII-1, p2.VII-2, p2.VII-3; P3_all: samples p3.I, p3.II, p3…
Sample	Gene set	Ratio of protein	Number of protein	Protein	P-value	FDR	Nodes
sets		in gene set	in gene set	from network
P1_I_II vs ref	Aurora B signaling(N)	0.0043	40	8	0	<1.67e-04	AURKA,CDCA8,INCENP,SGOL1,KIF2C,CENPA,BUB1,KIF20A
P1_I_II vs ref	Cell Cycle Checkpoints(R)	0.0128	118	10	0	0.000273	MCM10,ORC6,CDC20,CCNE1,CDC45,CDK1,BUB1B,CDC25A,CCNB1,CCNB2
P1_I_II vs ref	Cell cycle(K)	0.0134	124	18	0	<5.00e-04	TTK,RAD21,CDKN2A,ORC6,CCNA1,CCNA2,ESPL1,CDC20,PLK1,E2F2,CCNE1,CDC45,CDK1,BUB1B,BUB1,CDC25A,CCNB1,CCNB2
P1_I_II vs ref	FOXM1 transcription factor network(N)	0.0044	41	11	0	<2.50e-04	CDKN2A,CCNA2,NEK2,PLK1,CCNE1,CDK1,FOXM1,CENPA,CENPF,CCNB1,CCNB2
P1_I_II vs ref	Mitotic G1-G1/S phases(R)	0.0145	134	11	0	0.000222	MCM10,CDKN2A,ORC6,CCNA1,CCNA2,E2F2,CCNE1,CDC45,CDK1,CDC25A,CCNB1
P1_I_II vs ref	Mitotic G2-G2/M phases(R)	0.0094	87	9	0	0.0002	CEP72,CCNA1,CCNA2,NEK2,PLK1,CDK1,CDC25A,CCNB1,CCNB2
P1_I_II vs ref	Mitotic M-M/G1 phases(R)	0.024	222	22	0	<3.33e-04	MCM10,CDCA8,RAD21,INCENP,ORC6,SGOL1,SPC24,NUF2,CDC20,PLK1,E2F2,KIF2C,CDC45,CDK1,BUB1B,CENPA,BUB1,HIST1H2BH,CENPF,CCNB1,CCNB2,KIF20A
P1_I_II vs ref	Oocyte meiosis(K)	0.0121	112	12	0	<2.00e-04	ADCY8,AURKA,SGOL1,ESPL1,CDC20,PLK1,CCNE1,CDK1,BUB1,CALML5,CCNB1,CCNB2
P1_I_II vs ref	PLK1 signaling events(N)	0.0048	44	13	0	<1.00e-03	AURKA,INCENP,SGOL1,SPC24,CDC20,PLK1,CDK1,TPX2,ECT2,BUB1B,BUB1,CCNB1,KIF20A
P1_I_II vs ref	Progesterone-mediated oocyte maturation(K)	0.0093	86	10	0	<1.43e-04	ADCY8,CCNA1,CCNA2,PLK1,CDK1,BUB1,CDC25A,CCNB1,CCNB2,MAPK13
P1_I_II vs ref	Regulation of mitotic cell cycle(R)	0.009	83	9	0	0.00025	AURKA,CCNA1,CCNA2,NEK2,CDC20,PLK1,CDK1,BUB1B,CCNB1
P1_I_II vs ref	Cell-Cell communication(R)	0.0139	128	9	0.0001	0.00369	INADL,PARD6B,CRB3,CLDN3,PRKCI,CLDN16,CDH6,CLDN22,MAPK13
P1_I_II vs ref	p53 signaling pathway(K)	0.0074	68	7	0.0001	0.00217	CDKN2A,CCNE1,CDK1,BID,CCNB1,CCNB2,PERP
P1_I_II vs ref	E2F transcription factor network(N)	0.0073	67	6	0.0005	0.0146	CDKN2A,CCNA2,E2F2,CCNE1,CDK1,CDC25A
P1_I_II vs ref	Signaling by Rho GTPases(R)	0.0135	125	8	0.0005	0.0149	DEPDC1B,VAV3,RHOV,ARHGAP4,ARHGAP11B,ARHGEF16,ECT2,ARHGAP40
P1_I_II vs ref	role of ran in mitotic spindle regulation(B)	0.0013	12	3	0.0007	0.0186	RCC1,KIF15,TPX2
P1_I_II vs ref	Tight junction(K)	0.0143	132	8	0.0007	0.0186	INADL,CTNNA2,PARD6B,CRB3,CLDN3,PRKCI,CLDN16,CLDN22
P1_I_II vs ref	Validated transcriptional targets of TAp63 isoforms(N)	0.0054	50	5	0.0008	0.0199	CDKN2A,TFAP2C,PLK1,EVPL,PERP
P1_I_II vs ref	Aurora A signaling(N)	0.0034	31	4	0.0011	0.0253	AURKA,TPX2,CENPA,DLGAP5
P1_I_II vs ref	S Phase(R)	0.0121	112	7	0.0013	0.0274	ORC6,CCNA1,CCNA2,GINS1,CCNE1,CDC45,CDC25A
P1_I_II vs ref	Leukocyte transendothelial migration(K)	0.0126	116	7	0.0015	0.0316	CTNNA2,VAV3,CLDN3,CXCR4,CLDN16,CLDN22,MAPK13
P1_I_II vs ref	Cytokine-cytokine receptor interaction(K)	0.0287	265	11	0.0016	0.0324	CXCL11,CXCL10,IL1A,CCR8,TNFSF10,IL28RA,TNFRSF11B,CXCR4,TNF,CCL28,CCL20
P1_I_II vs ref	Factors involved in megakaryocyte development and platelet production(R)	0.0134	124	7	0.0022	0.0413	KIFC1,GATA3,KIF5A,KIF2C,KIF15,KLC3,KIF20A
P1_I_II vs ref	Regulation of retinoblastoma protein(N)	0.0068	63	5	0.0023	0.0387	CDKN2A,CCNA2,SFTPD,E2F2,CCNE1
P1_I_II vs ref	Rheumatoid arthritis(K)	0.01	92	6	0.0023	0.04	IL1A,ATP6V1B1,ATP6V1C1,ATP6V1C2,TNF,CCL20
P1_I_II vs ref	cyclins and cell cycle regulation(B)	0.0021	19	3	0.0027	0.044	CDKN2A,CCNE1,CCNB1
P1_I_II vs ref	Hepatitis C(K)	0.0142	131	7	0.003	0.0476	IKBKE,CLDN3,CLDN16,TNF,CLDN22,IFIT1,MAPK13
P1_I_II vs ref	MHC class II antigen presentation(R)	0.0111	103	6	0.004	0.0608	KIF5A,SPTBN2,KIF2C,KIF15,KLC3,KIF20A
P1_I_II vs ref	Validated transcriptional targets of deltaNp63 isoforms(N)	0.0049	45	4	0.0043	0.0641	CDKN2A,IL1A,CCNB2,PERP
P1_I_II vs ref	p73 transcription factor network(N)	0.0081	75	5	0.0048	0.0679	CCNA2,PLK1,CDK1,BUB1,CCNB1
P1_I_II vs ref	Regulation of DNA replication(R)	0.0081	75	5	0.0048	0.0679	MCM10,ORC6,CCNA1,CCNA2,E2F2
P1_I_II vs ref	Chemokine signaling pathway(K)	0.0205	189	8	0.0063	0.0857	ADCY8,CXCL11,CXCL10,CCR8,VAV3,CXCR4,CCL28,CCL20
P1_I_II vs ref	Collecting duct acid secretion(K)	0.0029	27	3	0.0072	0.0951	ATP6V1B1,ATP6V1C1,ATP6V1C2
P1_IV_V vs ref	Chemokine signaling pathway(K)	0.0205	189	14	0	<1.43e-04	CXCL11,CXCL10,CCR8,CCR4,CCL7,CXCL13,CXCR6,CXCL5,CXCL9,CCL22,CCL18,CCL17,CCL11,CCL13
P1_IV_V vs ref	Complement cascade(R)	0.0203	188	28	0	<5.00e-04	IGLV1-40,IGLV1-44,IGKV1-5,IGLV7-43,IGKV4-1,IGLV3-27,IGLV3-25,IGLV3-22,IGLV3-12,IGKC,IGLV3-16,IGLV1-36,IGLV10-54,IGLV5-45,IGHG1,IGHG2,IGHG3,IGHG4,IGHV7-81,IGLC7,IGLV2-23,IGLV8-61,IGLV2-11,IGLV2-18,IGLV7-46,IGLC2,IGLC1,IGLC3
P1_IV_V vs ref	Cytokine-cytokine receptor interaction(K)	0.0287	265	29	0	<3.33e-04	IL9R,CXCL11,CXCL10,TNFRSF17,CCR8,CCR4,CCL7,TNFRSF13B,MET,TNFSF11,CXCL13,IL21R,TNFRSF11B,CXCR6,LTB,LTA,INHBA,TNFSF13B,TNF,CXCL5,CXCL9,IL7R,CCL22,IL2RG,IL2RA,CCL18,CCL17,CCL11,CCL13
P1_IV_V vs ref	Extracellular matrix organization(R)	0.0183	169	18	0	<2.00e-04	MMP9,MMP1,PLOD2,LOX,COL10A1,LAMB3,ITGB6,FN1,LAMA3,TLL2,TLL1,COL11A1,MMP14,MMP13,MMP11,MMP10,COL8A1,HAPLN1
P1_IV_V vs ref	Fcgamma receptor (FCGR) dependent phagocytosis(R)	0.0253	234	30	0	<5.00e-04	IGLV1-40,IGLV1-44,IGKV1-5,IGLV7-43,IGKV4-1,IGLV3-27,IGLV3-25,IGLV3-22,IGLV3-12,IGKC,IGLV3-16,IGLV1-36,IGLV10-54,IGLV5-45,IGHG1,IGHG2,IGHG3,IGHG4,IGHV7-81,IGLC7,IGLV2-23,IGLV8-61,FCGR3A,IGLV2-11,IGLV2-18,FCGR1A,IGLV7-46,IGLC2,IGLC1,IGLC3
P1_IV_V vs ref	Immunoregulatory interactions between a Lymphoid and a non-Lymphoid cell(R)	0.0256	237	27	0	<2.50e-04	IGLV1-40,IGLV1-44,IGKV1-5,LILRB4,IGLV7-43,IGKV4-1,IGLV3-27,IGLV3-25,IGLV3-22,IGLV3-12,IGKC,IGLV3-16,IGLV1-36,IGLV10-54,IGLV5-45,IGHV7-81,IGLC7,IGLV2-23,IGLV8-61,FCGR3A,ICAM1,IGLV2-11,IGLV2-18,IGLV7-46,IGLC2,IGLC1,IGLC3
P1_IV_V vs ref	Rheumatoid arthritis(K)	0.01	92	10	0	<1.67e-04	MMP1,TNFSF11,LTB,ICAM1,CD80,TNFSF13B,TNF,CXCL5,CD28,CTLA4
P1_IV_V vs ref	Validated transcriptional targets of deltaNp63 isoforms(N)	0.0049	45	7	0	0.0005	CDKN2A,KRT14,VDR,SFN,KRT5,CCNB2,IGFBP3
P1_IV_V vs ref	Beta3 integrin cell surface interactions(N)	0.0047	43	6	0.0001	0.00533	TGFBI,IBSP,SPP1,FN1,SPHK1,PLAU
P1_IV_V vs ref	IL4-mediated signaling events(N)	0.0068	63	7	0.0001	0.005	IGHE,IGHG1,IGHG3,LTA,IL2RG,CCL17,CCL11
P1_IV_V vs ref	Beta1 integrin cell surface interactions(N)	0.0071	66	7	0.0002	0.00618	TGFBI,LAMB3,SPP1,FN1,LAMA3,PLAU,COL11A1
P1_IV_V vs ref	NF-kappa B signaling pathway(K)	0.01	92	8	0.0002	0.00758	TNFSF11,PLAU,LTB,LTA,ICAM1,TNFSF13B,TNF,CCL13
P1_IV_V vs ref	CXCR3-mediated signaling events(N)	0.0038	35	5	0.0004	0.0136	CXCL11,CXCL10,CXCL13,CXCL9,CCL11
P1_IV_V vs ref	Glucocorticoid receptor regulatory network(N)	0.0083	77	7	0.0004	0.0136	MMP1,GATA3,KRT17,KRT14,ICAM1,SFN,KRT5
P1_IV_V vs ref	Direct p53 effectors(N)	0.0145	134	9	0.0005	0.0163	SERPINE1,VDR,SPP1,MET,SH2D1A,VCAN,SFN,DKK1,IGFBP3
P1_IV_V vs ref	Primary immunodeficiency(K)	0.004	37	5	0.0005	0.0149	IGLL1,TNFRSF13B,CD79A,IL7R,IL2RG
P1_IV_V vs ref	Validated transcriptional targets of AP1 family members Fra1 and Fra2(N)	0.004	37	5	0.0005	0.0149	MMP9,MMP1,CDKN2A,LAMA3,PLAU
P1_IV_V vs ref	Aurora B signaling(N)	0.0043	40	5	0.0007	0.019	AURKA,CDCA8,CENPA,BUB1,BIRC5
P1_IV_V vs ref	ECM-receptor interaction(K)	0.0092	85	7	0.0007	0.019	IBSP,LAMB3,ITGB6,SPP1,FN1,LAMA3,COL11A1
P1_IV_V vs ref	FOXM1 transcription factor network(N)	0.0044	41	5	0.0008	0.0191	CDKN2A,PLK1,CENPA,BIRC5,CCNB2
P1_IV_V vs ref	Urokinase-type plasminogen activator (uPA) and uPAR-mediated signaling(N)	0.0045	42	5	0.0008	0.0201	MMP9,SERPINE1,FN1,PLAU,MMP13
P1_IV_V vs ref	Integrin cell surface interactions(R)	0.0096	89	7	0.0009	0.0213	IBSP,LAMB3,ITGB6,SPP1,FN1,LAMA3,ICAM1
P1_IV_V vs ref	Signaling by the B Cell Receptor (BCR)(R)	0.0382	353	15	0.0011	0.0254	IGHM,TRAT1,IGKV1-5,IGHD,IGKV4-1,IGKC,CD79A,IGHV7-81,IGLC7,FGF1,CD80,CD28,IGLC2,IGLC1,IGLC3
P1_IV_V vs ref	Intestinal immune network for IgA production(K)	0.0053	49	5	0.0016	0.034	TNFRSF17,TNFRSF13B,CD80,TNFSF13B,CD28
P1_IV_V vs ref	GPCR ligand binding(R)	0.0446	412	16	0.002	0.0386	EDN1,CXCL11,CXCL10,WNT10A,CCR8,CCR4,CCL7,CXCL13,CXCR6,WNT11,CXCL5,CXCL9,CCL22,CCL17,CCL11,WNT7A
P1_IV_V vs ref	HTLV-I infection(K)	0.0285	263	12	0.002	0.0376	CDKN2A,WNT10A,MYBL2,CDC20,LTA,ICAM1,WNT11,TNF,IL2RG,IL2RA,CCNB2,WNT7A
P1_IV_V vs ref	amb2 Integrin signaling(N)	0.0034	31	4	0.0021	0.0374	MMP9,PLAU,ICAM1,TNF
P1_IV_V vs ref	Osteoclast differentiation(K)	0.0143	132	8	0.0021	0.0361	SIRPG,LILRB4,TNFSF11,TNFRSF11B,FCGR3A,TNF,FCGR1A,CYBB
P1_IV_V vs ref	Cell adhesion molecules (CAMs)(K)	0.0144	133	8	0.0022	0.0362	CD274,PDCD1,ICAM1,CD80,VCAN,CD2,CD28,CTLA4
P1_IV_V vs ref	Syndecan-4-mediated signaling events(N)	0.0035	32	4	0.0024	0.0374	MMP9,FN1,TNFRSF13B,LAMA3
P1_IV_V vs ref	Alzheimer disease-presenilin pathway(P)	0.012	111	7	0.0032	0.0473	MMP9,MMP1,WNT10A,MMP14,MMP13,WNT11,WNT7A
P1_IV_V vs ref	Beta5 beta6 beta7 and beta8 integrin cell surface interactions(N)	0.0018	17	3	0.0032	0.0452	ITGB6,FN1,PLAU
P1_IV_V vs ref	Syndecan-1-mediated signaling events(N)	0.0018	17	3	0.0032	0.0452	MMP9,MMP1,MET
P1_IV_V vs ref	Pathways in cancer(K)	0.0352	325	13	0.0041	0.0553	MMP9,FGF11,MMP1,CDKN2A,WNT10A,LAMB3,FN1,MET,LAMA3,FGF1,WNT11,BIRC5,WNT7A
P1_IV_V vs ref	Hematopoietic cell lineage(K)	0.0096	89	6	0.0045	0.0604	IL9R,TNF,IL7R,FCGR1A,CD2,IL2RA
P1_IV_V vs ref	Cell cycle(K)	0.0134	124	7	0.0058	0.0744	TTK,CDKN2A,CDC20,PLK1,SFN,BUB1,CCNB2
P1_IV_V vs ref	p53 signaling pathway(K)	0.0074	68	5	0.0066	0.0822	CDKN2A,SERPINE1,SFN,CCNB2,IGFBP3
P1_IV_V vs ref	Type I diabetes mellitus(K)	0.0047	43	4	0.0066	0.081	LTA,CD80,TNF,CD28
P1_IV_V vs ref	AP-1 transcription factor network(N)	0.0075	69	5	0.007	0.0824	MMP9,EDN1,MMP1,CDKN2A,PLAU
P1_IV_V vs ref	PLK1 signaling events(N)	0.0048	44	4	0.0072	0.0828	AURKA,CDC20,PLK1,BUB1
P1_IV_V vs ref	Calcineurin-regulated NFAT-dependent transcription in lymphocytes(N)	0.005	46	4	0.0084	0.0944	GATA3,TNF,IL2RA,CTLA4
P1_IV_V vs ref	Toll-like receptor signaling pathway(K)	0.011	102	6	0.0086	0.0946	CXCL11,CXCL10,SPP1,CD80,TNF,CXCL9
P1_IV_V vs ref	FGF signaling pathway(N)	0.0051	47	4	0.009	0.0967	MMP9,SPP1,PLAU,FGF1
P1_IV_V vs ref	Costimulation by the CD28 family(R)	0.008	74	5	0.0092	0.0972	CD274,PDCD1,CD80,CD28,CTLA4
P2_I_II_VI vs ref	Aurora B signaling(N)	0.0043	40	7	0	0.00115	AURKB,CDCA8,NCAPH,BUB1,SGOL1,KIF2C,CENPA
P2_I_II_VI vs ref	Cadherin signaling pathway(P)	0.0108	100	12	0	0.0004	CTNNA2,PCDH20,CELSR3,PCDH15,PCDHB6,PCDHB2,FAT3,FZD2,WNT7A,WNT3A,WNT1,PCDH8
P2_I_II_VI vs ref	Cell cycle(K)	0.0134	124	14	0	0.000111	ESPL1,CHEK1,CDC20,BUB1,CCNB2,TTK,ORC6,ORC1,PLK1,E2F1,CDK1,BUB1B,CDC25C,CDC25A
P2_I_II_VI vs ref	FOXM1 transcription factor network(N)	0.0044	41	7	0	0.00143	AURKB,NEK2,CCNB2,PLK1,CDK1,CENPA,CENPF
P2_I_II_VI vs ref	GABAergic synapse(K)	0.0096	89	12	0	0.000125	GNG3,SLC32A1,GAD2,GAD1,GNGT1,KCNJ6,GNG13,GABRA2,GABRA1,GABRA3,GABBR2,GABRG3
P2_I_II_VI vs ref	GPCR ligand binding(R)	0.0446	412	28	0	<2.50e-04	EDN3,SHH,AGTR2,GNG3,PTH2R,GNGT1,NPY,NPW,CCKAR,OPRK1,NPY2R,GNG13,FZD2,HTR2C,WNT7A,QRFPR,F2RL2,WNT3A,WNT1,NTSR1,GLP1R,PPY,DRD1,ADM2,SST,GABBR2,CHRM2,HRH3
P2_I_II_VI vs ref	Mitotic M-M/G1 phases(R)	0.024	222	24	0	<5.00e-04	AURKB,HIST1H2BO,HIST1H2BM,CDCA8,ZWINT,NUF2,CDC20,HIST1H2AD,BUB1,HIST1H2BH,CCNB2,MCM10,ORC6,ORC1,SGOL1,SPC25,PLK1,E2F1,KIF2C,CDK1,BUB1B,CENPA,CENPF,CENPE
P2_I_II_VI vs ref	Morphine addiction(K)	0.01	92	11	0	0.000333	GNG3,SLC32A1,GNGT1,KCNJ6,GNG13,DRD1,GABRA2,GABRA1,GABRA3,GABBR2,GABRG3
P2_I_II_VI vs ref	Neuroactive ligand-receptor interaction(K)	0.0295	273	27	0	<1.00e-03	AGTR2,GRIN2B,CHRNA5,CHRNA4,PTH2R,CHRNB2,CCKAR,OPRK1,NPY2R,GRIA1,HTR2C,F2RL2,GRIK3,NTSR1,GPR50,GLP1R,DRD1,GABRA2,GABRA1,GABRA3,P2RX3,P2RX2,GABBR2,GABRG3,CHRM2,HRH3,PRSS3
P2_I_II_VI vs ref	Nicotine addiction(K)	0.0043	40	9	0	<2.00e-04	GRIN2B,CHRNA4,SLC32A1,CHRNB2,GRIA1,GABRA2,GABRA1,GABRA3,GABRG3
P2_I_II_VI vs ref	PLK1 signaling events(N)	0.0048	44	9	0	0.000167	CDC20,TPX2,BUB1,SGOL1,PLK1,CDK1,BUB1B,CENPE,CDC25C
P2_I_II_VI vs ref	Transmission across Chemical Synapses(R)	0.0197	182	19	0	<3.33e-04	GRIN2B,CHRNA5,CHRNA4,GNG3,SLC32A1,GAD2,GAD1,GNGT1,KCNJ6,CHRNB2,GNG13,GRIA1,GRIK3,GABRA2,GABRA1,GABRA3,CACNA1E,GABBR2,GABRG3
P2_I_II_VI vs ref	Wnt signaling network(N)	0.003	28	7	0	0.000364	FZD2,DKK1,KREMEN2,WNT7A,WNT3A,WNT1,WIF1
P2_I_II_VI vs ref	Wnt signaling pathway(P)	0.0294	272	21	0	0.000143	GNG3,MYH3,MYH8,CTNNA2,PCDH20,CELSR3,PCDH15,PCDHB6,PCDHB2,GNG13,FAT3,FZD2,DKK1,CDH18,WNT7A,CDH10,WNT3A,WNT1,HELLS,PCDH8,CDH4
P2_I_II_VI vs ref	Cell Cycle Checkpoints(R)	0.0128	118	11	0.0001	0.0022	CHEK1,CDC20,CCNB2,MCM10,ORC6,ORC1,CDK1,UBE2C,BUB1B,CDC25C,CDC25A
P2_I_II_VI vs ref	Retrograde endocannabinoid signaling(K)	0.011	102	10	0.0001	0.00344	GNG3,SLC32A1,GNGT1,KCNJ6,GNG13,GRIA1,GABRA2,GABRA1,GABRA3,GABRG3
P2_I_II_VI vs ref	Transcriptional Regulation of Pluripotent Stem Cells(R)	0.0053	49	7	0.0001	0.00376	DKK1,ORC1,SOX2,LIN28A,SALL4,SALL1,E2F1
P2_I_II_VI vs ref	Alcoholism(K)	0.0194	179	13	0.0002	0.00589	HIST1H2BO,HIST1H2BM,GRIN2B,GNG3,GNGT1,NPY,HIST2H2AB,HIST1H2AD,GNG13,HIST1H2BH,HIST1H2AH,DRD1,HIST3H2A
P2_I_II_VI vs ref	Signaling by SCF-KIT(R)	0.017	157	12	0.0002	0.00579	GNG3,CHEK1,GNGT1,FGF8,FGF9,FGF3,GNG13,FGF19,FGF17,FGFR3,NRG1,CDK1
P2_I_II_VI vs ref	PI3K/AKT Signaling in Cancer(R)	0.0128	118	10	0.0004	0.00814	GNG3,GNGT1,FGF8,FGF9,FGF3,GNG13,FGF19,FGF17,FGFR3,NRG1
P2_I_II_VI vs ref	PIP3 activates AKT signaling(R)	0.0128	118	10	0.0004	0.00814	GNG3,GNGT1,FGF8,FGF9,FGF3,GNG13,FGF19,FGF17,FGFR3,NRG1
P2_I_II_VI vs ref	Signaling by ERBB4(R)	0.0181	167	12	0.0004	0.00973	GNG3,GNGT1,GFAP,FGF8,FGF9,FGF3,GNG13,FGF19,FGF17,FGFR3,NRG1,CDK1
P2_I_II_VI vs ref	Validated transcriptional targets of deltaNp63 isoforms(N)	0.0049	45	6	0.0006	0.0126	KRT14,DLX5,TOP2A,CCNB2,HELLS,NRG1
P2_I_II_VI vs ref	Signaling by PDGF(R)	0.0219	202	13	0.0007	0.0143	GNG3,GNGT1,FGF8,FGF9,FGF3,GNG13,COL2A1,FGF19,FGF17,FGFR3,NRG1,CDK1,COL9A3
P2_I_II_VI vs ref	Mitotic G2-G2/M phases(R)	0.0094	87	8	0.0008	0.0168	NEK2,TUBB4A,CCNB2,PLK1,E2F1,CDK1,CDC25C,CDC25A
P2_I_II_VI vs ref	Oocyte meiosis(K)	0.0121	112	9	0.001	0.0195	ESPL1,CDC20,BUB1,CCNB2,SGOL1,FBXO43,PLK1,CDK1,CDC25C
P2_I_II_VI vs ref	Melanoma(K)	0.0077	71	7	0.0012	0.0213	FGF8,FGF9,FGF3,FGF19,FGF17,FGF11,E2F1
P2_I_II_VI vs ref	Hedgehog signaling pathway(K)	0.0061	56	6	0.0017	0.0313	SHH,BMP7,LRP2,WNT7A,WNT3A,WNT1
P2_I_II_VI vs ref	Signaling by FGFR(R)	0.0188	174	11	0.002	0.0348	GNG3,GNGT1,FGF8,FGF9,FGF3,GNG13,FGF19,FGF17,FGFR3,NRG1,CDK1
P2_I_II_VI vs ref	Signaling by ERBB2(R)	0.0189	175	11	0.0021	0.0351	GNG3,GNGT1,FGF8,FGF9,FGF3,GNG13,FGF19,FGF17,FGFR3,NRG1,CDK1
P2_I_II_VI vs ref	Pathways in cancer(K)	0.0352	325	16	0.0028	0.045	SHH,CTNNA2,FGF8,FGF9,FGF3,FZD2,WNT7A,FGF19,WNT3A,FGF17,FGF11,MMP1,WNT1,FGFR3,E2F1,DCC
P2_I_II_VI vs ref	Regulation of mitotic cell cycle(R)	0.009	83	7	0.0028	0.045	AURKB,NEK2,CDC20,PLK1,CDK1,UBE2C,BUB1B
P2_I_II_VI vs ref	Alzheimer disease-presenilin pathway(P)	0.012	111	8	0.0037	0.0571	CTNNA2,MMP13,FZD2,LRP2,WNT7A,WNT3A,MMP1,WNT1
P2_I_II_VI vs ref	Signaling by FGFR in disease(R)	0.0205	189	11	0.0037	0.0555	GNG3,GNGT1,FGF8,FGF9,FGF3,GNG13,FGF19,FGF17,FGFR3,NRG1,CDK1
P2_I_II_VI vs ref	Metabolism of steroid hormones and vitamins A and D(R)	0.005	46	5	0.0039	0.0567	GC,LRP2,APOA4,APOA2,APOC3
P2_I_II_VI vs ref	Gap junction(K)	0.0096	89	7	0.0041	0.0579	TUBB2B,GJD2,TUBB4A,TUBB3,HTR2C,DRD1,CDK1
P2_I_II_VI vs ref	E2F transcription factor network(N)	0.0073	67	6	0.0042	0.0575	MYBL2,ORC1,E2F1,E2F7,CDK1,CDC25A
P2_I_II_VI vs ref	Signaling by EGFR(R)	0.0208	192	11	0.0042	0.0561	GNG3,GNGT1,FGF8,FGF9,FGF3,GNG13,FGF19,FGF17,FGFR3,NRG1,CDK1
P2_I_II_VI vs ref	Signaling by EGFR in Cancer(R)	0.021	194	11	0.0045	0.0596	GNG3,GNGT1,FGF8,FGF9,FGF3,GNG13,FGF19,FGF17,FGFR3,NRG1,CDK1
P2_I_II_VI vs ref	Amyloids(R)	0.0053	49	5	0.0051	0.0658	HIST1H2BO,HIST1H2BM,HIST1H2AD,HIST1H2BH,APOA4
P2_I_II_VI vs ref	Heterotrimeric G-protein signaling pathway-Gi alpha and Gs alpha mediated pathway(P)	0.0159	147	9	0.0062	0.0766	GNG3,GNGT1,KCNJ6,OPRK1,HTR2C,GPR50,DRD1,CHRM2,HRH3
P2_I_II_VI vs ref	Basal cell carcinoma(K)	0.006	55	5	0.0082	0.0981	SHH,FZD2,WNT7A,WNT3A,WNT1
P2_V_VII vs ref	Cell cycle(K)	0.0134	124	12	0	<5.00e-04	PKMYT1,TTK,ORC6,ESPL1,CHEK1,CDC20,E2F1,CCNE1,CDK1,SFN,BUB1,CDC25C
P2_V_VII vs ref	Extracellular matrix organization(R)	0.0183	169	13	0	0.000333	MMP1,LAMA5,BMP7,COL11A2,COL11A1,MMP13,MMP11,MMP10,ADAMTS14,COL2A1,COL9A1,COL9A2,COL9A3
P2_V_VII vs ref	FOXM1 transcription factor network(N)	0.0044	41	7	0	0.0005	AURKB,NEK2,CCNE1,CDK1,FOXM1,CENPA,CENPF
P2_V_VII vs ref	GPCR ligand binding(R)	0.0446	412	20	0	0.0006	EDN2,WNT10A,GPR132,NTSR1,PTH2R,GNGT1,NPY,CXCL13,NPW,AVPR1B,ADM2,SST,NPBWR2,GRM4,NPFFR1,NMU,FZD2,FZD5,PNOC,WNT7A
P2_V_VII vs ref	Mitotic M-M/G1 phases(R)	0.024	222	17	0	<1.00e-03	AURKB,MCM10,HIST1H2BM,CDCA8,ORC6,ZWINT,SPC25,NUF2,CDC20,HIST1H3A,E2F1,CDK1,HIST1H2AD,CENPA,BUB1,HIST1H2BH,CENPF
P2_V_VII vs ref	Cell Cycle Checkpoints(R)	0.0128	118	9	0.0001	0.0065	MCM10,ORC6,CHEK1,CDC20,CLSPN,CCNE1,CDK1,UBE2C,CDC25C
P2_V_VII vs ref	Post-translational protein modification(R)	0.022	203	12	0.0001	0.006	HIST1H2BM,GCNT6,B3GNT3,MUC2,MUC4,HIST1H3A,MUC5AC,GALNT6,GALNT5,HIST1H2AD,GALNT13,HIST1H2BH
P2_V_VII vs ref	Signaling by PDGF(R)	0.0219	202	12	0.0001	0.00683	FGF18,FGF17,ERBB4,SPP1,GNGT1,FGF9,CDK1,PRKCG,COL2A1,COL9A1,COL9A2,COL9A3
P2_V_VII vs ref	Axon guidance(R)	0.0288	266	13	0.0003	0.0141	NRTN,L1CAM,NRCAM,SCN8A,KCNQ3,PAK4,CDK1,CNTN6,COL2A1,COL9A1,COL9A2,COL9A3,GFRA2
P2_V_VII vs ref	Alzheimer disease-presenilin pathway(P)	0.012	111	8	0.0004	0.0161	MMP1,WNT10A,CTNNA2,ERBB4,MMP13,FZD2,FZD5,WNT7A
P2_V_VII vs ref	Aurora B signaling(N)	0.0043	40	5	0.0005	0.0157	AURKB,CDCA8,NCAPH,CENPA,BUB1
P2_V_VII vs ref	Pathways in cancer(K)	0.0352	325	14	0.0006	0.0237	FGF18,FGF17,MMP1,WNT10A,CTNNA2,CBLC,LAMA5,E2F1,FGF9,CCNE1,PRKCG,FZD2,FZD5,WNT7A
P2_V_VII vs ref	PLK1 signaling events(N)	0.0048	44	5	0.0007	0.0235	CDC20,CLSPN,CDK1,BUB1,CDC25C
P2_V_VII vs ref	Complement cascade(R)	0.0203	188	10	0.0008	0.0258	IGLV1-40,IGLV1-44,IGLV7-43,IGKC,IGHG1,IGLV8-61,IGLV2-18,IGLV4-69,IGLV7-46,IGLC1
P2_V_VII vs ref	Amyloids(R)	0.0053	49	5	0.0011	0.0292	HIST1H2BM,HIST1H3A,PRL,HIST1H2AD,HIST1H2BH
P2_V_VII vs ref	Cadherin signaling pathway(P)	0.0108	100	7	0.0011	0.0299	WNT10A,CTNNA2,PCDHB6,PCDHB2,FZD2,FZD5,WNT7A
P2_V_VII vs ref	Wnt signaling network(N)	0.003	28	4	0.0011	0.0306	CTHRC1,FZD2,FZD5,WNT7A
P2_V_VII vs ref	Amoebiasis(K)	0.0116	107	7	0.0016	0.0373	MUC2,LAMA5,COL11A2,COL11A1,PRKCG,TNF,COL2A1
P2_V_VII vs ref	Noncanonical Wnt signaling pathway(N)	0.0035	32	4	0.0017	0.0375	CTHRC1,CHD7,FZD2,FZD5
P2_V_VII vs ref	Protein digestion and absorption(K)	0.0088	81	6	0.0019	0.0383	COL11A2,COL11A1,COL2A1,COL9A1,COL9A2,COL9A3
P2_V_VII vs ref	Oocyte meiosis(K)	0.0121	112	7	0.0021	0.0396	PKMYT1,ESPL1,CDC20,CCNE1,CDK1,BUB1,CDC25C
P2_V_VII vs ref	Wnt signaling pathway(P)	0.0294	272	11	0.0039	0.0739	WNT10A,CTNNA2,PCDHB6,PCDHB2,PRKCG,TNF,CDH6,FZD2,FZD5,CDH18,WNT7A
P2_V_VII vs ref	Fcgamma receptor (FCGR) dependent phagocytosis(R)	0.0253	234	10	0.004	0.0727	IGLV1-40,IGLV1-44,IGLV7-43,IGKC,IGHG1,IGLV8-61,IGLV2-18,IGLV4-69,IGLV7-46,IGLC1
P2_V_VII vs ref	Beta1 integrin cell surface interactions(N)	0.0071	66	5	0.0041	0.0697	SPP1,LAMA5,COL11A2,COL11A1,COL2A1
P2_V_VII vs ref	p53 signaling pathway(K)	0.0074	68	5	0.0046	0.0762	CHEK1,GTSE1,CCNE1,CDK1,SFN
P2_V_VII vs ref	Signaling by ERBB4(R)	0.0181	167	8	0.0051	0.0824	FGF18,FGF17,ERBB4,GNGT1,GFAP,FGF9,PRL,CDK1
P2_V_VII vs ref	p53 pathway(P)	0.0048	44	4	0.0053	0.0834	GTSE1,CCNE1,SFN,CDC25C
P2_V_VII vs ref	Mitotic G1-G1/S phases(R)	0.0145	134	7	0.0055	0.083	PKMYT1,MCM10,ORC6,MYBL2,E2F1,CCNE1,CDK1
P2_V_VII vs ref	Visual signal transduction: Rods(N)	0.0025	23	3	0.0059	0.0865	CNGB1,GNGT1,GUCA1A
P2_V_VII vs ref	Chromosome Maintenance(R)	0.0114	105	6	0.0066	0.0937	HIST1H2BM,DNA2,HIST1H2AD,CENPA,HJURP,HIST1H2BH
P3_all vs ref	Amyloids(R)	0.0053	49	6	0	0.00167	HIST1H2BM,HIST1H2BL,HIST1H2AB,HIST1H2AD,HIST1H2BH,HIST1H2AJ
P3_all vs ref	Aurora B signaling(N)	0.0043	40	7	0	<2.50e-04	AURKB,CDCA8,SGOL1,KIF2C,NCAPH,BUB1,BIRC5
P3_all vs ref	Cell cycle(K)	0.0134	124	12	0	<3.33e-04	PKMYT1,TTK,PTTG1,ORC1,ESPL1,CDC20,PLK1,E2F1,SFN,BUB1,CDC25C,CCNB2
P3_all vs ref	Mitotic M-M/G1 phases(R)	0.024	222	21	0	<1.00e-03	AURKB,CDCA8,HIST1H2BM,HIST1H2BL,ORC1,SGOL1,ZWINT,SPC24,CDC20,PLK1,E2F1,KIF2C,HIST1H2AB,HIST1H2AD,BUB1,HIST1H2BH,CENPF,BIRC5,CENPE,CCNB2,HIST1H2AJ
P3_all vs ref	Oocyte meiosis(K)	0.0121	112	10	0	<2.00e-04	PKMYT1,PTTG1,SGOL1,ESPL1,CDC20,PLK1,BUB1,CALML5,CDC25C,CCNB2
P3_all vs ref	PLK1 signaling events(N)	0.0048	44	9	0	<5.00e-04	SGOL1,SPC24,CDC20,PLK1,CLSPN,TPX2,BUB1,CENPE,CDC25C
P3_all vs ref	Meiosis(R)	0.0092	85	7	0.0001	0.00414	HIST1H2BM,HIST1H2BL,PRDM9,HIST1H2AB,HIST1H2AD,HIST1H2BH,HIST1H2AJ
P3_all vs ref	FOXM1 transcription factor network(N)	0.0044	41	5	0.0002	0.00578	AURKB,PLK1,CENPF,BIRC5,CCNB2
P3_all vs ref	Nicotine addiction(K)	0.0043	40	5	0.0002	0.00575	GABRQ,GABRD,GABRA3,GRIN1,GABRG3
P3_all vs ref	Post-translational protein modification(R)	0.022	203	10	0.0002	0.008	HIST1H2BM,HIST1H2BL,GCNT6,B3GNT4,HIST1H2AB,HIST1H2AD,GPAA1,HIST1H2BH,HIST1H2AJ,MUC16
P3_all vs ref	Alcoholism(K)	0.0194	179	9	0.0004	0.0162	HIST1H2BM,HIST1H2BL,GRIN1,HIST1H2AB,HIST1H2AD,CALML5,HIST1H2BH,HIST1H2AH,HIST1H2AJ
P3_all vs ref	Neuroactive ligand-receptor interaction(K)	0.0295	273	11	0.0006	0.022	GRIK5,GRID2,DRD5,GABRQ,GABRD,GABRA3,GRIN1,GABRG3,CHRM1,PRSS1,PRSS3
P3_all vs ref	Progesterone-mediated oocyte maturation(K)	0.0093	86	6	0.0008	0.0249	PKMYT1,PLK1,BUB1,CDC25C,CCNB2,MAPK13
P3_all vs ref	CXCR3-mediated signaling events(N)	0.0038	35	4	0.001	0.0293	CXCL11,CXCL10,CXCL13,CXCL9
P3_all vs ref	Epigenetic pathways(R)	0.0102	94	6	0.0012	0.0331	HIST1H2BM,HIST1H2BL,HIST1H2AB,HIST1H2AD,HIST1H2BH,HIST1H2AJ
P3_all vs ref	RNA Polymerase I, RNA Polymerase III, and Mitochondrial Transcription(R)	0.0103	95	6	0.0013	0.0324	HIST1H2BM,HIST1H2BL,HIST1H2AB,HIST1H2AD,HIST1H2BH,HIST1H2AJ
P3_all vs ref	Systemic lupus erythematosus(K)	0.0148	137	7	0.0017	0.04	HIST1H2BM,HIST1H2BL,HIST1H2AB,HIST1H2AD,HIST1H2BH,HIST1H2AH,HIST1H2AJ
P3_all vs ref	Toll-like receptor signaling pathway(K)	0.011	102	6	0.0018	0.0403	CXCL11,CXCL10,SPP1,CXCL9,MAPK13,IRF7
P3_all vs ref	Chromosome Maintenance(R)	0.0114	105	6	0.0021	0.0451	HIST1H2BM,HIST1H2BL,HIST1H2AB,HIST1H2AD,HIST1H2BH,HIST1H2AJ
P3_all vs ref	Validated transcriptional targets of deltaNp63 isoforms(N)	0.0049	45	4	0.0025	0.0529	KRT14,SFN,KRT5,CCNB2
P3_all vs ref	Transcriptional Regulation of Pluripotent Stem Cells(R)	0.0053	49	4	0.0034	0.0678	ORC1,SALL4,E2F1,POU5F1
P3_all vs ref	Cell Cycle Checkpoints(R)	0.0128	118	6	0.0037	0.0708	ORC1,CDC20,CLSPN,UBE2C,CDC25C,CCNB2
P3_all vs ref	Regulation of mitotic cell cycle(R)	0.009	83	5	0.004	0.0719	AURKB,PTTG1,CDC20,PLK1,UBE2C
P3_all vs ref	Factors involved in megakaryocyte development and platelet production(R)	0.0134	124	6	0.0047	0.0804	KIFC1,KIF5A,KIF2C,KLC3,CENPE,IRF7
P3_all vs ref	Mitotic G2-G2/M phases(R)	0.0094	87	5	0.0048	0.0785	PKMYT1,PLK1,E2F1,CDC25C,CCNB2
P3_all vs ref	GABAergic synapse(K)	0.0096	89	5	0.0053	0.0827	GABRQ,HAP1,GABRD,GABRA3,GABRG3
P3_all vs ref	Extracellular matrix organization(R)	0.0183	169	7	0.0054	0.0813	GDF5,COL24A1,BMP7,COL11A1,MMP13,ADAMTS14,PRSS1
P3_all vs ref	Cytokine-cytokine receptor interaction(K)	0.0287	265	9	0.006	0.0886	GDF5,CXCL11,CXCL10,CCR8,CXCL13,BMP7,XCL1,INHBA,CXCL9

## Sheet: GOenrichment_vs_ref
Supplementary table 6. Expression differences branches vs ref. GO biological process enrichment. P1_I_II: samples p1.I-1, p1.I-2, p1.II-1, p1.II-2; P1_IV_V: samples p1.IV-1, p1.IV-2, p1.IV-3, p1.V-1; p2_I_II_VI: samples p2.I-1, p2.I-2, p2.II-2, p2.IV-1, p2.IV-2, p2.IV-3; P2_V_VII: samples p2.V-1, p2.VII-1, p2.VII-2, p2.VII-3; P3_all: samples p3.I, p3.II, p3.III, p3.IV, p3.V, p3.VI, p3.VII.
Sample	Gene set	Ratio of protein	Number of protein	Protein	P-value	FDR	Nodes
set		in gene set	in gene set	from network
P1_I_II vs ref	microtubule-based movement	0.0069	70	8	0	0.0002727	KIFC2,KIFC1,KIF5A,KIF2C,KIF14,KIF15,TUBAL3,KIF20A
P1_I_II vs ref	cell cycle checkpoint	0.0113	115	10	0	0.0003	MCM10,CDKN2A,ORC6,CDC20,CDC45,CDK1,BUB1B,CDC25A,CCNB1,CCNB2
P1_I_II vs ref	tight junction assembly	0.0029	29	6	0	0.0003333	INADL,PARD6B,CRB3,PRKCI,ECT2,CLDN22
P1_I_II vs ref	epidermis development	0.0057	58	7	0	0.001417	S100A7,GRHL3,KRT16,DSP,EVPL,CALML5,KLK7
P1_I_II vs ref	mitotic cell cycle spindle assembly checkpoint	0.0026	26	5	0.0001	0.002077	TTK,CDC20,BUB1B,BUB1,CENPF
P1_I_II vs ref	apoptotic process	0.058	589	22	0.0001	0.003143	RAD21,IL1A,ESPL1,KRT18,DSP,FGFR3,VAV3,TNFSF10,E2F2,ARHGAP4,TNFRSF11B,CXCR4,CDK1,TPX2,ARHGEF16,ECT2,BUB1B,MELK,BID,TNF,BUB1,PERP
P1_I_II vs ref	spindle organization	0.0016	16	4	0.0001	0.005	CEP72,TTK,AURKA,BUB1B
P1_I_II vs ref	regulation of cyclin-dependent protein kinase activity	0.0048	49	6	0.0001	0.005333	CCNA1,CCNA2,CCNE1,CDC25A,CCNB1,CCNB2
P1_I_II vs ref	cell-cell junction organization	0.0055	56	6	0.0002	0.008333	INADL,PARD6B,CRB3,PRKCI,CDH6,CLDN22
P1_I_II vs ref	O-glycan processing	0.0055	56	6	0.0002	0.008333	B3GNT3,MUC1,MUC4,GALNT14,MUC20,MUC16
P1_I_II vs ref	regulation of transcription involved in G1/S phase of mitotic cell cycle	0.002	20	4	0.0003	0.008684	CCNA1,CCNE1,CDC45,CDK1
P1_I_II vs ref	cell proliferation	0.0272	276	13	0.0003	0.00975	IL1A,KRT16,MKI67,LAMA5,PLK1,KIF15,TPX2,BUB1B,MELK,BUB1,DLGAP5,CENPF,CDC25A
P1_I_II vs ref	mitotic metaphase/anaphase transition	0.0009	9	3	0.0004	0.01295	RAD21,PLK1,BUB1B
P1_I_II vs ref	peptidoglycan catabolic process	0.0002	2	2	0.0004	0.0235	PGLYRP4,PGLYRP3
P1_I_II vs ref	cell junction assembly	0.0068	69	6	0.0007	0.02796	INADL,PARD6B,CRB3,PRKCI,CDH6,CLDN22
P1_I_II vs ref	cytokinesis	0.0045	46	5	0.0007	0.02824	INCENP,ESPL1,PLK1,CEP55,KIF20A
P1_I_II vs ref	cellular response to heat	0.0011	11	3	0.0007	0.02874	CXCL10,IL1A,MKI67
P1_I_II vs ref	anaphase-promoting complex-dependent proteasomal ubiquitin-dependent protein catabolic process	0.007	71	6	0.0008	0.02946	AURKA,CDC20,PLK1,CDK1,BUB1B,CCNB1
P1_I_II vs ref	chemotaxis	0.0098	100	7	0.0009	0.03937	S100A8,CXCL11,CXCL10,CCR8,CCL28,CCL20,CCBP2
P1_I_II vs ref	positive regulation of interleukin-6 production	0.0031	31	4	0.0013	0.04266	IL1A,CARD9,TNF,MAPK13
P1_I_II vs ref	defense response to Gram-positive bacterium	0.0029	29	4	0.001	0.04365	PGLYRP4,PGLYRP3,CARD9,TNF
P1_I_II vs ref	response to virus	0.0137	139	8	0.0013	0.04391	GATA3,MX1,CXCR4,HMGA1,TNF,IFIT2,IFIT1,DMBT1
P1_I_II vs ref	regulation of small GTPase mediated signal transduction	0.0131	133	8	0.001	0.0444	DEPDC1B,VAV3,RHOV,ARHGAP4,ARHGAP11B,ARHGEF16,ECT2,ARHGAP40
P1_I_II vs ref	mitotic sister chromatid segregation	0.0014	14	3	0.0013	0.04491	KIFC1,ESPL1,NEK2
P1_I_II vs ref	wound healing	0.0051	52	5	0.0012	0.04531	S100A8,IL1A,GRHL3,DSP,ERBB3
P1_I_II vs ref	protein localization to chromatin	0.0003	3	2	0.001	0.04572	RAD21,PLK1
P1_I_II vs ref	senescence-associated heterochromatin focus assembly	0.0003	3	2	0.001	0.04572	CDKN2A,HMGA1
P1_I_II vs ref	positive regulation of cellular senescence	0.0004	4	2	0.0017	0.05872	CDKN2A,HMGA1
P1_I_II vs ref	positive regulation of mitotic metaphase/anaphase transition	0.0004	4	2	0.0017	0.05872	ESPL1,DLGAP5
P1_I_II vs ref	regulation of attachment of spindle microtubules to kinetochore	0.0004	4	2	0.0017	0.05872	NEK2,ECT2
P1_I_II vs ref	protein phosphorylation	0.0337	342	13	0.0021	0.06307	AURKA,NEK2,PTK6,TEC,IKBKE,PLK1,CCNE1,CDK1,PRKCI,PBK,BUB1B,FRK,BUB1
P1_I_II vs ref	cytoskeleton organization	0.0082	83	6	0.0017	0.06344	KRT16,LAMA5,ARHGAP4,PRKCI,KRT7,KRT8
P1_I_II vs ref	negative regulation of cytokine secretion involved in immune response	0.0005	5	2	0.0027	0.07834	APOA1,TNF
P1_I_II vs ref	protein localization to kinetochore	0.0005	5	2	0.0027	0.07834	CDK1,BUB1B
P1_I_II vs ref	regulation of G2/M transition of mitotic cell cycle	0.0005	5	2	0.0027	0.07834	CENPF,CCNB2
P1_I_II vs ref	DNA replication	0.0118	120	7	0.0024	0.07866	MCM10,ORC6,CDC45,CDK1,KRT7,CENPF,CDC25A
P1_I_II vs ref	cell cycle	0.02	203	9	0.0039	0.09098	AURKA,KRT18,PARD6B,CDC20,KLK10,CDK1,BUB1B,FOXM1,MAPK13
P1_I_II vs ref	cellular response to interferon-alpha	0.0006	6	2	0.0038	0.09255	GATA3,IFIT2
P1_I_II vs ref	chronic inflammatory response	0.0006	6	2	0.0038	0.09255	S100A8,S100A9
P1_I_II vs ref	mitotic cell cycle G2/M transition DNA damage checkpoint	0.0006	6	2	0.0038	0.09255	CCNA2,CDK1
P1_I_II vs ref	regulation of dendrite development	0.0006	6	2	0.0038	0.09255	CDC20,BCL11A
P1_I_II vs ref	regulation of ubiquitin-protein ligase activity involved in mitotic cell cycle	0.0065	66	5	0.0034	0.09596	CDC20,PLK1,CDK1,BUB1B,CCNB1
P1_I_II vs ref	induction of apoptosis by extracellular signals	0.0096	97	6	0.0037	0.099	VAV3,TNFSF10,ARHGAP4,ARHGEF16,ECT2,TNF
P1_I_II vs ref	calcium-independent cell-cell adhesion	0.002	20	3	0.0036	0.09967	CLDN3,CLDN16,CLDN22
P1_IV_V vs ref	cell adhesion	0.0341	346	18	0	0.00025	TGFBI,CCR8,SIRPG,IBSP,LAMB3,ITGB6,SPP1,FN1,LAMA3,PKP1,PKP3,ICAM1,SIGLEC8,VCAN,COL8A1,HAPLN1,CCL11,DSC3
P1_IV_V vs ref	collagen catabolic process	0.0021	21	5	0	0.001222	MMP9,MMP1,MMP13,MMP11,MMP10
P1_IV_V vs ref	complement activation	0.0151	153	11	0	0.001273	IGKV1-5,IGKV4-1,IGKC,IGHG1,IGHG2,IGHG3,IGHG4,IGLC7,IGLC2,IGLC1,IGLC3
P1_IV_V vs ref	lymph node development	0.0011	11	4	0	0.0014	CXCL13,LTB,LTA,IL7R
P1_IV_V vs ref	response to estrogen stimulus	0.0057	58	7	0	0.001462	GATA3,SERPINE1,TNFRSF11B,MMP14,MMP13,CYP27B1,WNT7A
P1_IV_V vs ref	complement activation, classical pathway	0.0155	157	11	0	0.001583	IGKV1-5,IGKV4-1,IGKC,IGHG1,IGHG2,IGHG3,IGHG4,IGLC7,IGLC2,IGLC1,IGLC3
P1_IV_V vs ref	cell surface receptor signaling pathway	0.0138	140	10	0.0001	0.003071	EDN1,CXCL10,TNFRSF13B,MET,CD274,INHBA,IL7R,CD2,CD28,IL2RA
P1_IV_V vs ref	eosinophil chemotaxis	0.0007	7	3	0.0002	0.008	CCL7,CCL11,CCL13
P1_IV_V vs ref	ossification	0.0056	57	6	0.0003	0.01131	MMP9,IBSP,ECM1,TNFSF11,COL11A1,MMP14
P1_IV_V vs ref	skin development	0.0036	37	5	0.0003	0.01159	WNT10A,TFAP2A,LTB,SFN,GJB3
P1_IV_V vs ref	humoral immune response	0.0037	38	5	0.0003	0.01294	PDCD1,SH2D1A,LTA,TNF,CD28
P1_IV_V vs ref	biomineral tissue development	0.0009	9	3	0.0004	0.01335	IBSP,SPP1,ECM1
P1_IV_V vs ref	cell proliferation	0.0272	276	13	0.0004	0.014	IL9R,TGFBI,TNFRSF17,KRT16,MET,LAMP3,PLK1,CD274,TNFSF13B,MELK,SFN,BUB1,IL2RA
P1_IV_V vs ref	interleukin-7-mediated signaling pathway	0.0002	2	2	0.0005	0.01845	IL7R,IL2RG
P1_IV_V vs ref	positive regulation of chronic inflammatory response to antigenic stimulus	0.0002	2	2	0.0005	0.01845	LTA,TNF
P1_IV_V vs ref	positive regulation of mitosis	0.0024	24	4	0.0006	0.02881	EDN1,AURKA,TNF,CD28
P1_IV_V vs ref	tumor necrosis factor-mediated signaling pathway	0.0024	24	4	0.0006	0.02881	TNFRSF17,KRT18,TNFSF11,TNF
P1_IV_V vs ref	positive regulation of cell migration	0.0088	89	7	0.0005	0.02965	EDN1,TFAP2A,CCL7,SPHK1,FGF1,WNT11,CCL11
P1_IV_V vs ref	hemidesmosome assembly	0.001	10	3	0.0005	0.03029	KRT14,LAMB3,KRT5
P1_IV_V vs ref	T cell costimulation	0.0069	70	6	0.0008	0.03311	CD274,PDCD1,CD80,TNFSF13B,CD28,CTLA4
P1_IV_V vs ref	cartilage development	0.0045	46	5	0.0008	0.03341	NOG,EDN1,MMP13,LUM,WNT7A
P1_IV_V vs ref	interleukin-2-mediated signaling pathway	0.0003	3	2	0.001	0.03843	IL2RG,IL2RA
P1_IV_V vs ref	trigeminal nerve development	0.0003	3	2	0.001	0.03843	TFAP2A,ISL1
P1_IV_V vs ref	skeletal system development	0.01	102	7	0.0011	0.05194	NOG,MMP9,COL10A1,VDR,TLL1,TNFRSF11B,WNT7A
P1_IV_V vs ref	positive regulation of cell proliferation	0.0315	320	13	0.0015	0.05664	EDN1,TTK,CXCL10,PRAME,SIRPG,CDC20,SLAMF1,FGF1,TNFSF13B,KRT6A,CXCL5,BIRC5,ISL1
P1_IV_V vs ref	negative regulation of apoptotic process	0.0238	242	11	0.0015	0.05753	NOG,PRAME,KRT18,TFAP2A,SPHK1,CXCL13,PLK1,CHST11,WNT11,TNF,WNT7A
P1_IV_V vs ref	negative regulation of mammary gland epithelial cell proliferation	0.0004	4	2	0.0018	0.06369	GATA3,ETV4
P1_IV_V vs ref	non-canonical Wnt receptor signaling pathway	0.0004	4	2	0.0018	0.06369	WNT11,WNT7A
P1_IV_V vs ref	cytoskeleton organization	0.0082	83	6	0.002	0.07557	KRT16,CCL7,KRT7,KRT8,CCL11,CCL13
P1_IV_V vs ref	mitotic prometaphase	0.0082	83	6	0.002	0.07557	CDCA8,CDC20,PLK1,CENPA,BUB1,BIRC5
P1_IV_V vs ref	cardiac right ventricle morphogenesis	0.0005	5	2	0.0028	0.07585	GATA3,ISL1
P1_IV_V vs ref	epidermis morphogenesis	0.0005	5	2	0.0028	0.07585	WNT10A,TFAP2A
P1_IV_V vs ref	negative regulation of cartilage development	0.0005	5	2	0.0028	0.07585	NOG,WNT11
P1_IV_V vs ref	positive regulation of intracellular protein kinase cascade	0.0005	5	2	0.0028	0.07585	TNFSF11,FGF1
P1_IV_V vs ref	positive regulation of synaptic plasticity	0.0005	5	2	0.0028	0.07585	MMP9,CDC20
P1_IV_V vs ref	tissue remodeling	0.0005	5	2	0.0028	0.07585	MMP9,MMP14
P1_IV_V vs ref	ureteric bud formation	0.0005	5	2	0.0028	0.07585	NOG,GATA3
P1_IV_V vs ref	response to vitamin D	0.0017	17	3	0.0024	0.0801	CXCL10,SPP1,CYP27B1
P1_IV_V vs ref	M phase of mitotic cell cycle	0.0089	90	6	0.0029	0.08035	CDCA8,CDC20,PLK1,CENPA,BUB1,BIRC5
P1_IV_V vs ref	epidermis development	0.0057	58	5	0.0022	0.08113	KRT17,KRT16,KRT14,LAMB3,KRT5
P1_IV_V vs ref	positive regulation of angiogenesis	0.0058	59	5	0.0024	0.08126	MMP9,SPHK1,ECM1,FGF1,CCL11
P1_IV_V vs ref	negative regulation of cell proliferation	0.0301	306	12	0.003	0.08327	CDKN2A,GATA3,SIRPG,TFAP2A,MYO16,ACVR1C,PTGES,INHBA,TNF,SFN,CYP27B1,IGFBP3
P1_IV_V vs ref	axon regeneration	0.0006	6	2	0.004	0.08898	VCAN,ISL1
P1_IV_V vs ref	chronic inflammatory response	0.0006	6	2	0.004	0.08898	CXCL13,CCL11
P1_IV_V vs ref	cornea development in camera-type eye	0.0006	6	2	0.004	0.08898	TFAP2A,PAX6
P1_IV_V vs ref	positive regulation of humoral immune response mediated by circulating immunoglobulin	0.0006	6	2	0.004	0.08898	LTA,TNF
P1_IV_V vs ref	face morphogenesis	0.002	20	3	0.0039	0.09185	NOG,TFAP2A,DKK1
P1_IV_V vs ref	response to hyperoxia	0.002	20	3	0.0039	0.09185	MMP9,SERPINE1,PLAU
P1_IV_V vs ref	response to hypoxia	0.0158	160	8	0.0037	0.09286	MMP9,EDN1,PLOD2,PLAU,LTA,MMP14,MMP13,TNF
P1_IV_V vs ref	response to mechanical stimulus	0.0041	42	4	0.0043	0.09571	MMP9,MMP14,MMP13,TNF
P1_IV_V vs ref	regulation of immune response	0.0198	201	9	0.0043	0.09726	IGKV1-5,IGKV4-1,IGKC,IGLC7,FCGR3A,ICAM1,IGLC2,IGLC1,IGLC3
P1_IV_V vs ref	positive regulation of gene expression	0.0097	99	6	0.0046	0.09831	WNT10A,TFAP2A,PAX6,WNT11,CTCFL,IL7R
P1_IV_V vs ref	bone mineralization	0.0021	21	3	0.0044	0.09836	MMP13,WNT11,CYP27B1
P1_IV_V vs ref	sensory perception of sound	0.0068	69	5	0.0046	0.09972	TFAP2A,COL11A1,GJB3,GJB6,GJB2
P2_I_II_VI vs ref	spindle organization	0.0016	16	6	0	9.091e-05	SPAG5,ZWINT,TTK,KIF11,UBE2C,BUB1B
P2_I_II_VI vs ref	mitosis	0.0155	157	16	0	0.0001	TUBB2B,CDCA2,NEK2,TPX2,CCNB2,ASPM,HELLS,PLK1,CDK1,KIF11,KIF15,UBE2C,BUB1B,KIF18B,CDC25C,CDC25A
P2_I_II_VI vs ref	axon guidance	0.0287	291	22	0	0.0001667	SHH,TBR1,LHX2,NKX2-1,DLX5,BMP7,TUBB3,SLIT1,COL2A1,WNT3A,UNC5D,VAX1,NEUROG2,CDK1,OTX2,CNTN2,NCAN,DCC,CDH4,COL9A3,DPYSL5,DPYSL4
P2_I_II_VI vs ref	neuron migration	0.0063	64	10	0	0.0002308	TUBB2B,TWIST1,NKX2-1,CELSR3,CCKAR,VAX1,ASCL1,NEUROG2,CNTN2,DCC
P2_I_II_VI vs ref	palate development	0.0052	53	9	0	0.00025	SHH,MSX1,DLX5,COL11A2,COL2A1,WNT7A,WNT3A,VAX1,TFAP2A
P2_I_II_VI vs ref	feeding behavior	0.0028	28	7	0	0.0002667	NKX2-1,NPY,NPW,CCKAR,HTR2C,GLP1R,ADM2
P2_I_II_VI vs ref	chromosome segregation	0.0051	52	9	0	0.0002857	SPAG5,NEK2,NUF2,TOP2A,BUB1,SGOL1,SPC25,HJURP,CENPF
P2_I_II_VI vs ref	embryonic forelimb morphogenesis	0.002	20	6	0	0.0002941	SHH,TWIST1,MSX1,WNT7A,TFAP2A,HOXA9
P2_I_II_VI vs ref	embryonic limb morphogenesis	0.0032	33	7	0	0.0003158	GDF5,SHH,DLX5,BMP7,FGF9,SALL4,SP9
P2_I_II_VI vs ref	osteoblast differentiation	0.0043	44	8	0	0.0003333	NOG,TWIST1,DLX5,FGF9,WNT3A,SOX2,SOX8,SP7
P2_I_II_VI vs ref	cartilage development	0.0045	46	8	0	0.00035	NOG,GDF5,DLX2,BMP7,COL11A2,MMP13,COL2A1,WNT7A
P2_I_II_VI vs ref	central nervous system neuron development	0.0014	14	5	0	0.0004091	FOXG1,NPY,MAP2,ASCL1,NEUROG2
P2_I_II_VI vs ref	mitotic sister chromatid segregation	0.0014	14	5	0	0.0004091	KIFC1,ESPL1,SPAG5,ZWINT,NEK2
P2_I_II_VI vs ref	epithelial cell differentiation	0.0036	37	7	0	0.0007391	KRT14,UPK1A,DLX5,BMP7,UPK2,MSI1,KRT4
P2_I_II_VI vs ref	mitotic cell cycle spindle assembly checkpoint	0.0026	26	6	0.0001	0.001208	CDC20,BUB1,TTK,UBE2C,BUB1B,CENPF
P2_I_II_VI vs ref	trigeminal nerve development	0.0003	3	3	0.0001	0.00144	TFAP2A,POU4F1,ISL1
P2_I_II_VI vs ref	bone morphogenesis	0.0017	17	5	0.0001	0.001607	MSX1,TFAP2A,FGFR3,PAX1,SP5
P2_I_II_VI vs ref	gamma-aminobutyric acid signaling pathway	0.0017	17	5	0.0001	0.001607	GABRA2,GABRA1,GABRA3,GABBR2,GABRG3
P2_I_II_VI vs ref	G2 phase of mitotic cell cycle	0.0009	9	4	0.0001	0.001655	GTSE1,BLM,E2F1,CENPF
P2_I_II_VI vs ref	inner ear morphogenesis	0.004	41	7	0.0001	0.001667	FOXG1,DLX5,FGF9,COL2A1,WNT3A,WNT1,TFAP2A
P2_I_II_VI vs ref	negative regulation of neuron differentiation	0.0039	40	7	0.0001	0.001731	FOXG1,BMP7,ASPM,ASCL1,SOX2,CNTN2,ISL1
P2_I_II_VI vs ref	regulation of gene expression by genetic imprinting	0.001	10	4	0.0001	0.003129	DNMT3L,DNMT3B,IGF2,CTCFL
P2_I_II_VI vs ref	face morphogenesis	0.002	20	5	0.0002	0.003455	NOG,MSX1,DLX5,DKK1,TFAP2A
P2_I_II_VI vs ref	nervous system development	0.0239	243	17	0.0002	0.0035	NOG,DLX5,PCDHB6,PCDHB2,ACTL6B,ELAVL3,FGF19,FGF17,FGF11,CSPG5,DSCAM,NRG1,CHRM2,DPF1,MSI1,DPYSL5,DPYSL4
P2_I_II_VI vs ref	cell cycle checkpoint	0.0113	115	11	0.0002	0.003529	CHEK1,CDC20,CCNB2,MCM10,ORC6,ORC1,CDK1,UBE2C,BUB1B,CDC25C,CDC25A
P2_I_II_VI vs ref	positive regulation of cell proliferation	0.0315	320	20	0.0002	0.0036	EDN3,SHH,PRAME,CDC20,FGF8,FGF9,FGF3,TLX1,IGF2,FGF19,WNT3A,FGF17,TTK,WNT1,GLP1R,FGFR3,SOX11,POU3F3,POU3F2,ISL1
P2_I_II_VI vs ref	embryonic pattern specification	0.0021	21	5	0.0002	0.003703	SHH,BMP7,WNT3A,WNT1,TFAP2A
P2_I_II_VI vs ref	pituitary gland development	0.0021	21	5	0.0002	0.003703	NOG,NKX2-1,SOX2,SALL1,ISL1
P2_I_II_VI vs ref	neuron differentiation	0.0063	64	8	0.0002	0.005	EDN3,TUBB2B,TLX1,WNT3A,GPC2,SOX11,BRSK2,POU3F2
P2_I_II_VI vs ref	protein localization to kinetochore	0.0005	5	3	0.0003	0.005119	AURKB,CDK1,BUB1B
P2_I_II_VI vs ref	axonogenesis	0.0048	49	7	0.0003	0.00515	CTNNA2,MAP2,CCKAR,WNT3A,POU4F1,DCC,BRSK2
P2_I_II_VI vs ref	DNA replication	0.0118	120	11	0.0003	0.005154	CHEK1,POLQ,TOP2A,MCM10,ORC6,ORC1,DTL,CDK1,CENPF,CDC25C,CDC25A
P2_I_II_VI vs ref	skeletal system development	0.01	102	10	0.0003	0.005244	NOG,DLX5,BMP7,COL11A2,COL2A1,IGF2,WNT7A,FGFR3,PAX1,SOX11
P2_I_II_VI vs ref	embryonic skeletal system development	0.0023	23	5	0.0003	0.005326	NOG,SHH,FGF9,HOXA9,HOXB9
P2_I_II_VI vs ref	positive regulation of neuron differentiation	0.005	51	7	0.0003	0.005591	DNMT3B,BMP7,ASCL1,LIN28A,NEUROG2,SALL1,SOX11
P2_I_II_VI vs ref	negative regulation of neurogenesis	0.0013	13	4	0.0004	0.005711	BMP7,WNT7A,WNT3A,PAX6
P2_I_II_VI vs ref	embryonic hindlimb morphogenesis	0.0024	24	5	0.0004	0.006362	SHH,TWIST1,MSX1,MMP13,WNT7A
P2_I_II_VI vs ref	digestion	0.0036	37	6	0.0004	0.00637	NPY,CCKAR,PPY,ADM2,SST,PRSS3
P2_I_II_VI vs ref	nucleosome assembly	0.0086	87	9	0.0004	0.006938	HIST1H2BO,HIST1H2BM,HIST2H2AB,HIST1H2AD,HIST1H2BH,HIST1H2AH,HIST3H2A,HJURP,CENPA
P2_I_II_VI vs ref	locomotory behavior	0.0052	53	7	0.0004	0.007347	CHRNA4,NKX2-1,CHRNB2,NPY2R,CALB1,DSCAM,CACNA1E
P2_I_II_VI vs ref	behavioral response to nicotine	0.0006	6	3	0.0005	0.007472	CHRNA5,CHRNA4,CHRNB2
P2_I_II_VI vs ref	cornea development in camera-type eye	0.0006	6	3	0.0005	0.007472	TFAP2A,PAX6,SOX11
P2_I_II_VI vs ref	embryonic skeletal joint morphogenesis	0.0006	6	3	0.0005	0.007472	NOG,BMP7,COL2A1
P2_I_II_VI vs ref	homophilic cell adhesion	0.0126	128	11	0.0004	0.00748	PCDH20,CELSR3,PCDH15,PCDHB6,PCDHB2,FAT3,CDH18,CDH10,DSG3,PCDH8,CDH4
P2_I_II_VI vs ref	dorsal/ventral pattern formation	0.0026	26	5	0.0005	0.007673	NOG,SHH,FOXG1,LHX2,WNT7A
P2_I_II_VI vs ref	neural crest cell migration	0.0026	26	5	0.0005	0.007673	EDN3,SHH,FGF19,SOX8,ISL1
P2_I_II_VI vs ref	astrocyte development	0.0007	7	3	0.0008	0.009951	GFAP,DRD1,POU3F2
P2_I_II_VI vs ref	kinetochore assembly	0.0007	7	3	0.0008	0.009951	CENPA,CENPF,CENPE
P2_I_II_VI vs ref	negative regulation of transcription regulatory region DNA binding	0.0007	7	3	0.0008	0.009951	MSX1,LHX2,SOX11
P2_I_II_VI vs ref	somite development	0.0007	7	3	0.0008	0.009951	NOG,SHH,SOX11
P2_I_II_VI vs ref	cell proliferation	0.0272	276	17	0.0007	0.01025	AURKB,UHRF1,KRT16,MKI67,NPY,DLX5,TPX2,BUB1,LRP2,PLK1,E2F1,NRG1,KIF15,BUB1B,CENPF,CDC25C,CDC25A
P2_I_II_VI vs ref	epidermis development	0.0057	58	7	0.0007	0.01044	KRT13,KRT16,KRT15,KRT14,SPRR3,KRT1,POU3F2
P2_I_II_VI vs ref	axial mesoderm development	0.0002	2	2	0.0012	0.02248	NOG,FOXH1
P2_I_II_VI vs ref	Bergmann glial cell differentiation	0.0002	2	2	0.0012	0.02248	SHH,GFAP
P2_I_II_VI vs ref	cerebral cortex GABAergic interneuron differentiation	0.0002	2	2	0.0012	0.02248	NKX2-1,ASCL1
P2_I_II_VI vs ref	dorsal/ventral axon guidance	0.0002	2	2	0.0012	0.02248	SLIT1,DCC
P2_I_II_VI vs ref	glutamate decarboxylation to succinate	0.0002	2	2	0.0012	0.02248	GAD2,GAD1
P2_I_II_VI vs ref	negative regulation of cardiac muscle tissue development	0.0002	2	2	0.0012	0.02248	FGF8,FGF3
P2_I_II_VI vs ref	negative regulation of cholesterol import	0.0002	2	2	0.0012	0.02248	APOA2,APOC3
P2_I_II_VI vs ref	neuroepithelial cell differentiation	0.0002	2	2	0.0012	0.02248	FGF8,SOX11
P2_I_II_VI vs ref	positive regulation of striated muscle cell differentiation	0.0002	2	2	0.0012	0.02248	SHH,NRG1
P2_I_II_VI vs ref	regulation of mitotic centrosome separation	0.0002	2	2	0.0012	0.02248	NEK2,CHEK1
P2_I_II_VI vs ref	embryonic digit morphogenesis	0.0032	32	5	0.0014	0.02395	NOG,SHH,TWIST1,WNT7A,SALL1
P2_I_II_VI vs ref	negative regulation of transcription from RNA polymerase II promoter	0.0396	402	21	0.0013	0.02399	NOG,AURKB,SHH,TWIST1,MSX1,FOXH1,NKX2-1,DNMT3B,DLX2,DKK1,CBX2,TFAP2A,SOX2,SALL4,PLK1,SALL1,E2F1,POU4F1,SOX11,POU3F3,ISL1
P2_I_II_VI vs ref	neuron fate specification	0.0009	9	3	0.0016	0.02471	ASCL1,POU4F1,ISL1
P2_I_II_VI vs ref	spinal cord association neuron differentiation	0.0009	9	3	0.0016	0.02471	WNT3A,WNT1,ASCL1
P2_I_II_VI vs ref	positive regulation of transcription, DNA-dependent	0.043	437	22	0.0016	0.02478	SHH,AGTR2,FOXH1,LHX2,NKX2-1,DLX5,BMP7,WNT7A,WNT3A,WNT1,TFAP2A,BLM,SOX2,SOX8,SALL1,E2F1,PAX6,PAX3,SOX11,OTX2,CTCFL,POU3F3
P2_I_II_VI vs ref	behavioral response to pain	0.0008	8	3	0.0011	0.02506	GRIN2B,P2RX3,CACNA1E
P2_I_II_VI vs ref	eyelid development in camera-type eye	0.0008	8	3	0.0011	0.02506	TWIST1,TFAP2A,SOX11
P2_I_II_VI vs ref	organ regeneration	0.0049	50	6	0.0018	0.02603	MKI67,CCKAR,LRP2,WNT1,APOA2,CDK1
P2_I_II_VI vs ref	multicellular organismal development	0.03	305	17	0.002	0.02657	EDN3,PKP1,DLX4,TLL2,FAT3,IGF2,FZD2,HOXA9,UPK2,HELLS,HOXB8,HOXB9,WIF1,PAX7,HOXC11,CTNND2,CENPE
P2_I_II_VI vs ref	sensory perception of sound	0.0068	69	7	0.0019	0.02682	PCDH15,CHRNB2,COL11A2,COL2A1,TFAP2A,PAX3,POU3F4
P2_I_II_VI vs ref	limb bud formation	0.001	10	3	0.0021	0.02834	SHH,COL2A1,SOX11
P2_I_II_VI vs ref	phospholipid efflux	0.001	10	3	0.0021	0.02834	APOA4,APOA2,APOC3
P2_I_II_VI vs ref	response to retinoic acid	0.0035	36	5	0.0023	0.03746	SHH,HSD17B2,DKK1,LRP2,ASCL1
P2_I_II_VI vs ref	forebrain ventricular zone progenitor cell division	0.0003	3	2	0.0027	0.04153	POU3F3,POU3F2
P2_I_II_VI vs ref	metanephric mesenchymal cell proliferation involved in metanephros development	0.0003	3	2	0.0027	0.04153	SHH,BMP7
P2_I_II_VI vs ref	miRNA catabolic process	0.0003	3	2	0.0027	0.04153	LIN28A,LIN28B
P2_I_II_VI vs ref	negative regulation of very-low-density lipoprotein particle remodeling	0.0003	3	2	0.0027	0.04153	APOA2,APOC3
P2_I_II_VI vs ref	olfactory pit development	0.0003	3	2	0.0027	0.04153	DLX5,ASCL1
P2_I_II_VI vs ref	positive regulation of dermatome development	0.0003	3	2	0.0027	0.04153	WNT3A,WNT1
P2_I_II_VI vs ref	regulation of axon diameter	0.0003	3	2	0.0027	0.04153	WNT7A,CNTN2
P2_I_II_VI vs ref	regulation of synapse structural plasticity	0.0003	3	2	0.0027	0.04153	CTNNA2,NCAN
P2_I_II_VI vs ref	RNA 3'-end processing	0.0003	3	2	0.0027	0.04153	LIN28A,LIN28B
P2_I_II_VI vs ref	sensory system development	0.0003	3	2	0.0027	0.04153	POU4F1,ISL1
P2_I_II_VI vs ref	telencephalon regionalization	0.0003	3	2	0.0027	0.04153	SHH,LHX2
P2_I_II_VI vs ref	neural crest cell development	0.0011	11	3	0.0028	0.04195	TFAP2A,NRG1,SOX11
P2_I_II_VI vs ref	G2/M transition DNA damage checkpoint	0.0023	23	4	0.0028	0.04205	CHEK1,DTL,BLM,PLK1
P2_I_II_VI vs ref	cell-cell signaling	0.0209	212	13	0.003	0.04239	EDN3,GDF5,SHH,FGF9,FGF3,WNT3A,FGF17,FGF11,WNT1,GPR50,SST,PCDH8,AMH
P2_I_II_VI vs ref	neurotransmitter secretion	0.0038	39	5	0.0032	0.04321	SLC32A1,GAD2,GAD1,WNT7A,HRH3
P2_I_II_VI vs ref	outflow tract morphogenesis	0.0024	24	4	0.0033	0.04333	NPY2R,TFAP2A,SOX11,ISL1
P2_I_II_VI vs ref	negative regulation of apoptotic process	0.0238	242	14	0.0035	0.04409	NOG,SHH,PRAME,MSX1,COL2A1,WNT7A,WNT1,ASCL1,TFAP2A,GLP1R,SOX8,ALB,PLK1,POU3F3
P2_I_II_VI vs ref	mitotic cell cycle checkpoint	0.0012	12	3	0.0036	0.04456	ZWINT,BUB1,BUB1B
P2_I_II_VI vs ref	endocardial cushion morphogenesis	0.0004	4	2	0.0047	0.06395	TWIST1,ISL1
P2_I_II_VI vs ref	regulation of attachment of spindle microtubules to kinetochore	0.0004	4	2	0.0047	0.06395	SPAG5,NEK2
P2_I_II_VI vs ref	regulation of chromosome segregation	0.0004	4	2	0.0047	0.06395	AURKB,BUB1
P2_I_II_VI vs ref	regulation of intestinal cholesterol absorption	0.0004	4	2	0.0047	0.06395	APOA4,APOA2
P2_I_II_VI vs ref	soft palate development	0.0004	4	2	0.0047	0.06395	COL11A2,SOX11
P2_I_II_VI vs ref	neural tube closure	0.0042	43	5	0.0048	0.06397	NOG,TWIST1,LHX2,SALL4,SALL1
P2_I_II_VI vs ref	midbrain development	0.0027	27	4	0.005	0.06402	SHH,MSX1,WNT1,OTX2
P2_I_II_VI vs ref	associative learning	0.0014	14	3	0.0055	0.06426	GRIN2B,CHRNB2,GLP1R
P2_I_II_VI vs ref	establishment of cell polarity	0.0014	14	3	0.0055	0.06426	SHH,WNT7A,BRSK2
P2_I_II_VI vs ref	positive regulation of cardiac muscle cell proliferation	0.0014	14	3	0.0055	0.06426	FGF9,NRG1,CDK1
P2_I_II_VI vs ref	odontogenesis of dentin-containing tooth	0.0043	44	5	0.0053	0.06499	SHH,SOSTDC1,MSX1,DLX2,BMP7
P2_I_II_VI vs ref	high-density lipoprotein particle remodeling	0.0013	13	3	0.0045	0.06587	APOA4,APOA2,APOC3
P2_I_II_VI vs ref	positive regulation of cell division	0.0041	42	5	0.0044	0.06594	SHH,FGF8,FGF9,FGF3,IGF2
P2_I_II_VI vs ref	behavioral fear response	0.0016	16	3	0.0079	0.07891	GRIN2B,DRD1,CACNA1E
P2_I_II_VI vs ref	cellular response to organic substance	0.0016	16	3	0.0079	0.07891	MAP2,CALB1,POU3F2
P2_I_II_VI vs ref	hindbrain development	0.0016	16	3	0.0079	0.07891	SHH,TBR1,FOXG1
P2_I_II_VI vs ref	mitotic spindle organization	0.0016	16	3	0.0079	0.07891	TTK,SPC25,KIF11
P2_I_II_VI vs ref	reverse cholesterol transport	0.0016	16	3	0.0079	0.07891	APOA4,APOA2,APOC3
P2_I_II_VI vs ref	spinal cord development	0.0016	16	3	0.0079	0.07891	NOG,SLIT1,SOX11
P2_I_II_VI vs ref	activation of anaphase-promoting complex activity	0.0005	5	2	0.0072	0.07903	CDC20,UBE2C
P2_I_II_VI vs ref	cerebral cortex GABAergic interneuron migration	0.0005	5	2	0.0072	0.07903	DRD1,CNTN2
P2_I_II_VI vs ref	conditioned taste aversion	0.0005	5	2	0.0072	0.07903	CHRNB2,DRD1
P2_I_II_VI vs ref	embryonic axis specification	0.0005	5	2	0.0072	0.07903	WNT7A,WNT1
P2_I_II_VI vs ref	forebrain neuron differentiation	0.0005	5	2	0.0072	0.07903	ASCL1,POU3F4
P2_I_II_VI vs ref	innervation	0.0005	5	2	0.0072	0.07903	POU4F1,ISL1
P2_I_II_VI vs ref	mitotic metaphase	0.0005	5	2	0.0072	0.07903	CDCA8,CENPE
P2_I_II_VI vs ref	negative regulation of intracellular estrogen receptor signaling pathway	0.0005	5	2	0.0072	0.07903	FOXH1,ISL1
P2_I_II_VI vs ref	negative regulation of mitosis	0.0005	5	2	0.0072	0.07903	CHEK1,BMP7
P2_I_II_VI vs ref	neurological system process	0.0005	5	2	0.0072	0.07903	CHRNA4,CHRNB2
P2_I_II_VI vs ref	regulation of G2/M transition of mitotic cell cycle	0.0005	5	2	0.0072	0.07903	CCNB2,CENPF
P2_I_II_VI vs ref	response to wounding	0.0048	49	5	0.0082	0.08072	GFAP,F2RL2,WNT1,SOX2,PAX6
P2_I_II_VI vs ref	thymus development	0.0029	29	4	0.0064	0.08357	SHH,FGF3,CCNB2,PAX1
P2_I_II_VI vs ref	G2/M transition of mitotic cell cycle	0.0107	109	8	0.0067	0.08394	NEK2,CHEK1,TUBB4A,CCNB2,PLK1,CDK1,CDC25C,CDC25A
P2_I_II_VI vs ref	regulation of action potential	0.0015	15	3	0.0066	0.08449	GRIN2B,CHRNA4,GJD2
P2_I_II_VI vs ref	tail morphogenesis	0.0015	15	3	0.0066	0.08449	FGF3,WNT3A,SP5
P2_I_II_VI vs ref	cholesterol efflux	0.0018	18	3	0.0108	0.0886	APOA4,APOA2,APOC3
P2_I_II_VI vs ref	embryonic cranial skeleton morphogenesis	0.0018	18	3	0.0108	0.0886	TWIST1,DLX2,TFAP2A
P2_I_II_VI vs ref	endochondral ossification	0.0018	18	3	0.0108	0.0886	DLX5,COL2A1,FGFR3
P2_I_II_VI vs ref	protein localization to nucleus	0.0018	18	3	0.0108	0.0886	SHH,MSX1,BMP7
P2_I_II_VI vs ref	attachment of spindle microtubules to kinetochore	0.0006	6	2	0.0102	0.08941	AURKB,SGOL1
P2_I_II_VI vs ref	cerebral cortex radially oriented cell migration	0.0006	6	2	0.0102	0.08941	POU3F3,POU3F2
P2_I_II_VI vs ref	lung-associated mesenchyme development	0.0006	6	2	0.0102	0.08941	SHH,FGF9
P2_I_II_VI vs ref	methylation-dependent chromatin silencing	0.0006	6	2	0.0102	0.08941	DNMT3B,HELLS
P2_I_II_VI vs ref	organ formation	0.0006	6	2	0.0102	0.08941	SHH,TLX1
P2_I_II_VI vs ref	peristalsis	0.0006	6	2	0.0102	0.08941	DRD1,P2RX3
P2_I_II_VI vs ref	pre-miRNA processing	0.0006	6	2	0.0102	0.08941	LIN28A,LIN28B
P2_I_II_VI vs ref	sodium-independent organic anion transport	0.0006	6	2	0.0102	0.08941	ALB,SLCO1A2
P2_I_II_VI vs ref	stem cell development	0.0006	6	2	0.0102	0.08941	SHH,WNT7A
P2_I_II_VI vs ref	tongue morphogenesis	0.0006	6	2	0.0102	0.08941	SHH,KRT13
P2_I_II_VI vs ref	anterior/posterior pattern specification	0.0072	73	6	0.0108	0.09069	SHH,MSX1,WNT7A,HOXA9,HOXB8,HOXB9
P2_I_II_VI vs ref	synapse assembly	0.0032	32	4	0.009	0.09381	PCDHB6,PCDHB2,DRD1,POU4F1
P2_I_II_VI vs ref	hippocampus development	0.0032	33	4	0.0099	0.09488	GRIN2B,NKX2-1,DLX2,WNT3A
P2_I_II_VI vs ref	lipoprotein metabolic process	0.0032	33	4	0.0099	0.09488	APOA4,APOA2,ALB,APOC3
P2_I_II_VI vs ref	negative regulation of neuron projection development	0.0017	17	3	0.0093	0.09499	GFAP,WNT3A,DCC
P2_I_II_VI vs ref	pancreas development	0.0017	17	3	0.0093	0.09499	SHH,CCKAR,ISL1
P2_I_II_VI vs ref	positive regulation of branching involved in ureteric bud morphogenesis	0.0017	17	3	0.0093	0.09499	NOG,AGTR2,SOX8
P2_I_II_VI vs ref	anaphase-promoting complex-dependent proteasomal ubiquitin-dependent protein catabolic process	0.007	71	6	0.0095	0.09527	AURKB,CDC20,PLK1,CDK1,UBE2C,BUB1B
P2_I_II_VI vs ref	G-protein coupled receptor signaling pathway	0.0242	246	13	0.0098	0.0955	AGTR2,GNG3,PTH2R,CELSR3,GNGT1,NPW,QRFPR,NTSR1,GPR50,APOC3,SST,GABBR2,CHRM2
P2_V_VII vs ref	mitotic prometaphase	0.0082	83	9	0	0.001	AURKB,CDCA8,ZWINT,SPC25,NUF2,CDC20,CENPA,BUB1,CENPF
P2_V_VII vs ref	O-glycan processing	0.0055	56	7	0	0.001833	B3GNT3,MUC2,MUC4,MUC5AC,GALNT6,GALNT5,GALNT13
P2_V_VII vs ref	collagen catabolic process	0.0021	21	5	0	0.002	MMP1,MMP13,MMP11,MMP10,ADAMTS14
P2_V_VII vs ref	mitotic cell cycle spindle assembly checkpoint	0.0026	26	5	0	0.004571	TTK,CDC20,UBE2C,BUB1,CENPF
P2_V_VII vs ref	sensory perception of sound	0.0068	69	7	0.0001	0.005889	TFAP2A,COL11A2,COL11A1,COL2A1,CHD7,GJB3,GJB2
P2_V_VII vs ref	mitotic sister chromatid segregation	0.0014	14	4	0.0001	0.006	KIFC1,ESPL1,ZWINT,NEK2
P2_V_VII vs ref	extracellular matrix organization	0.0074	75	7	0.0001	0.008909	MMP1,GFAP,COL11A1,MMP13,MMP11,MMP10,TNF
P2_V_VII vs ref	palate development	0.0052	53	6	0.0002	0.008917	TFAP2A,COL11A2,INHBA,COL2A1,CHD7,WNT7A
P2_V_VII vs ref	chromosome segregation	0.0051	52	6	0.0001	0.0096	NEK2,SPC25,NUF2,HJURP,BUB1,CENPF
P2_V_VII vs ref	digestion	0.0036	37	5	0.0003	0.01315	NPY,ADM2,MUC5AC,SST,NMU
P2_V_VII vs ref	cell proliferation	0.0272	276	13	0.0003	0.01329	AURKB,ERBB4,MKI67,NPY,LAMA5,E2F1,PAK4,PRL,SFN,BUB1,DLGAP5,CENPF,CDC25C
P2_V_VII vs ref	DNA damage checkpoint	0.0021	21	4	0.0003	0.01353	CHEK1,BRIP1,E2F1,CLSPN
P2_V_VII vs ref	cell cycle checkpoint	0.0113	115	8	0.0004	0.01406	MCM10,ORC6,CHEK1,CDC20,CLSPN,CDK1,UBE2C,CDC25C
P2_V_VII vs ref	nucleosome assembly	0.0086	87	7	0.0004	0.01488	HIST1H2BM,HIST1H3A,HIST2H2AB,HIST1H2AD,CENPA,HJURP,HIST1H2BH
P2_V_VII vs ref	inner ear morphogenesis	0.004	41	5	0.0004	0.01526	TFAP2A,FGF9,COL11A1,COL2A1,CHD7
P2_V_VII vs ref	G2 phase of mitotic cell cycle	0.0009	9	3	0.0004	0.01581	E2F1,GTSE1,CENPF
P2_V_VII vs ref	establishment of localization in cell	0.0002	2	2	0.0004	0.02186	GRIK5,ZWINT
P2_V_VII vs ref	regulation of mitotic centrosome separation	0.0002	2	2	0.0004	0.02186	NEK2,CHEK1
P2_V_VII vs ref	axon guidance	0.0287	291	13	0.0004	0.02386	NRTN,L1CAM,NRCAM,SCN8A,BMP7,KCNQ3,TUBB3,CDK1,CNTN6,COL2A1,COL9A1,COL9A2,COL9A3
P2_V_VII vs ref	DNA replication	0.0118	120	8	0.0005	0.02661	MCM10,ORC6,CHEK1,POLQ,CLSPN,CDK1,CENPF,CDC25C
P2_V_VII vs ref	extracellular matrix disassembly	0.0027	27	4	0.0008	0.02764	MMP1,MMP13,MMP11,MMP10
P2_V_VII vs ref	microtubule-based movement	0.0069	70	6	0.0007	0.02838	KIFC1,TUBB2B,KIF5A,TUBB3,KIF14,KIF18B
P2_V_VII vs ref	positive regulation of gene expression	0.0097	99	7	0.0008	0.02859	WNT10A,TFAP2A,ADM2,E2F1,FGF9,CDK1,CTCFL
P2_V_VII vs ref	cartilage development	0.0045	46	5	0.0007	0.02936	BMP7,COL11A2,MMP13,COL2A1,WNT7A
P2_V_VII vs ref	G1/S transition of mitotic cell cycle	0.0124	126	8	0.0006	0.03013	PKMYT1,MCM10,ORC6,GPR132,E2F1,CCNE1,CDK1,INHBA
P2_V_VII vs ref	skeletal system development	0.01	102	7	0.0009	0.03197	BMP7,COL11A2,COL2A1,COL9A2,CHD7,IGF2,WNT7A
P2_V_VII vs ref	positive regulation of cardiac muscle cell proliferation	0.0014	14	3	0.0013	0.05025	ERBB4,FGF9,CDK1
P2_V_VII vs ref	regulation of mitosis	0.0014	14	3	0.0013	0.05025	PKMYT1,NEK2,CDC25C
P2_V_VII vs ref	neuropeptide signaling pathway	0.0053	54	5	0.0014	0.05039	NPY,NPW,NPFFR1,NMU,PNOC
P2_V_VII vs ref	G-protein coupled receptor signaling pathway	0.0242	246	11	0.0012	0.05223	NTSR1,GPR50,PTH2R,GNGT1,NPW,AVPR1B,SST,NPBWR2,GRM4,NPFFR1,NMU
P2_V_VII vs ref	positive regulation of heterotypic cell-cell adhesion	0.0004	4	2	0.0017	0.06244	BMP7,TNF
P2_V_VII vs ref	positive regulation of mitotic metaphase/anaphase transition	0.0004	4	2	0.0017	0.06244	ESPL1,DLGAP5
P2_V_VII vs ref	regulation of chromosome segregation	0.0004	4	2	0.0017	0.06244	AURKB,BUB1
P2_V_VII vs ref	spindle organization	0.0016	16	3	0.0018	0.06927	TTK,ZWINT,UBE2C
P2_V_VII vs ref	skin development	0.0036	37	4	0.0024	0.07513	WNT10A,TFAP2A,SFN,GJB3
P2_V_VII vs ref	activation of anaphase-promoting complex activity	0.0005	5	2	0.0026	0.07698	CDC20,UBE2C
P2_V_VII vs ref	embryonic axis specification	0.0005	5	2	0.0026	0.07698	FZD5,WNT7A
P2_V_VII vs ref	epidermis morphogenesis	0.0005	5	2	0.0026	0.07698	WNT10A,TFAP2A
P2_V_VII vs ref	negative regulation of mitosis	0.0005	5	2	0.0026	0.07698	CHEK1,BMP7
P2_V_VII vs ref	protein localization to kinetochore	0.0005	5	2	0.0026	0.07698	AURKB,CDK1
P2_V_VII vs ref	mitosis	0.0155	157	8	0.0026	0.08203	TUBB2B,PKMYT1,CDCA2,NEK2,CDK1,UBE2C,KIF18B,CDC25C
P2_V_VII vs ref	regulation of cell migration	0.0039	40	4	0.0032	0.08576	ERBB4,LAMA5,SST,MMP10
P2_V_VII vs ref	embryonic forelimb morphogenesis	0.002	20	3	0.0035	0.08765	CRABP2,TFAP2A,WNT7A
P2_V_VII vs ref	cell cycle	0.02	203	9	0.0035	0.08864	ZWINT,CDC20,CLSPN,PAK4,CDK1,UBE2C,FOXM1,CTCFL,HJURP
P2_V_VII vs ref	nervous system development	0.0239	243	10	0.0036	0.09183	NRTN,FGF17,L1CAM,ERBB4,SCN8A,PCDHB6,PCDHB2,INHBA,MSI1,ELAVL3
P2_V_VII vs ref	embryonic skeletal joint morphogenesis	0.0006	6	2	0.0037	0.09302	BMP7,COL2A1
P2_V_VII vs ref	proteoglycan metabolic process	0.0006	6	2	0.0037	0.09302	COL11A1,COL2A1
P2_V_VII vs ref	embryonic pattern specification	0.0021	21	3	0.004	0.09818	TFAP2A,ERBB4,BMP7
P3_all vs ref	mitotic cell cycle spindle assembly checkpoint	0.0026	26	5	0	0.001833	TTK,CDC20,UBE2C,BUB1,CENPF
P3_all vs ref	mitosis	0.0155	157	10	0	0.004286	PKMYT1,PTTG1,PLK1,TPX2,UBE2C,CEP55,KIF18B,BIRC5,CDC25C,CCNB2
P3_all vs ref	nucleosome assembly	0.0086	87	7	0.0002	0.0115	HIST1H2BM,HIST1H2BL,HIST1H2AB,HIST1H2AD,HIST1H2BH,HIST1H2AH,HIST1H2AJ
P3_all vs ref	G2 phase of mitotic cell cycle	0.0009	9	3	0.0002	0.01589	E2F1,GTSE1,CENPF
P3_all vs ref	growth	0.0028	28	4	0.0005	0.02971	GDF5,BMP7,INHBA,CCNB2
P3_all vs ref	prepulse inhibition	0.0011	11	3	0.0004	0.0304	GRID2,CTNNA2,GRIN1
P3_all vs ref	cartilage development	0.0045	46	5	0.0004	0.03043	NOG,GDF5,BMP7,MMP13,WNT7A
P3_all vs ref	cytokinesis	0.0045	46	5	0.0004	0.03043	AURKB,ESPL1,PLK1,CEP55,BIRC5
P3_all vs ref	cell-cell signaling	0.0209	212	10	0.0005	0.03044	FGF18,GDF5,CXCL11,CXCL10,ISG15,CXCL13,XCL1,INHBA,CXCL9,GJB2
P3_all vs ref	microtubule-based movement	0.0069	70	6	0.0003	0.034	KIFC2,KIFC1,KIF5A,KIF2C,KIF18B,CENPE
P3_all vs ref	chromosome segregation	0.0051	52	5	0.0006	0.03661	PTTG1,SGOL1,BUB1,CENPF,BIRC5
P3_all vs ref	establishment of localization in cell	0.0002	2	2	0.0003	0.037	GRIK5,ZWINT
P3_all vs ref	sensory perception of sound	0.0068	69	6	0.0003	0.0379	TFAP2A,PCDH15,COL11A1,CHD7,GJB3,GJB2
P3_all vs ref	chromosome organization	0.0014	14	3	0.0009	0.04929	PTTG1,CDCA8,RAD54L
P3_all vs ref	mitotic sister chromatid segregation	0.0014	14	3	0.0009	0.04929	KIFC1,ESPL1,ZWINT
P3_all vs ref	keratinization	0.0015	15	3	0.001	0.04948	IVL,EVPL,SPRR3
P3_all vs ref	keratinocyte differentiation	0.0033	34	4	0.0011	0.04979	IVL,EVPL,SPRR3,SFN
P3_all vs ref	cell proliferation	0.0272	276	11	0.001	0.0505	AURKB,KRT16,PLK1,E2F1,PAK7,TPX2,CHRM1,SFN,BUB1,CENPF,CDC25C
P3_all vs ref	positive regulation of exit from mitosis	0.0003	3	2	0.0007	0.05158	UBE2C,BIRC5
P3_all vs ref	synaptic transmission, glutamatergic	0.0017	17	3	0.0015	0.06214	GRIK5,GRID2,GRIN1
P3_all vs ref	regulation of chromosome segregation	0.0004	4	2	0.0013	0.06293	AURKB,BUB1
P3_all vs ref	skin development	0.0036	37	4	0.0015	0.06404	TFAP2A,SFN,KRT9,GJB3
P3_all vs ref	peptide cross-linking	0.0016	16	3	0.0013	0.06446	IVL,EVPL,SPRR3
P3_all vs ref	spindle organization	0.0016	16	3	0.0013	0.06446	TTK,ZWINT,UBE2C
P3_all vs ref	activation of anaphase-promoting complex activity	0.0005	5	2	0.002	0.07906	CDC20,UBE2C
P3_all vs ref	mitotic metaphase	0.0005	5	2	0.002	0.07906	CDCA8,CENPE
P3_all vs ref	regulation of G2/M transition of mitotic cell cycle	0.0005	5	2	0.002	0.07906	CENPF,CCNB2
P3_all vs ref	embryonic forelimb morphogenesis	0.002	20	3	0.0024	0.07968	CRABP2,TFAP2A,WNT7A
P3_all vs ref	regulation of excitatory postsynaptic membrane potential	0.002	20	3	0.0024	0.07968	GRIK5,GRID2,GRIN1
P3_all vs ref	anaphase-promoting complex-dependent proteasomal ubiquitin-dependent protein catabolic process	0.007	71	5	0.0025	0.08263	AURKB,PTTG1,CDC20,PLK1,UBE2C
P3_all vs ref	attachment of spindle microtubules to kinetochore	0.0006	6	2	0.0029	0.09171	AURKB,SGOL1
P3_all vs ref	embryonic skeletal joint morphogenesis	0.0006	6	2	0.0029	0.09171	NOG,BMP7
P3_all vs ref	collagen catabolic process	0.0021	21	3	0.0027	0.09314	MMP13,ADAMTS14,KLK6

## Sheet: PWenrichment_branches
Supplementary table 6. Differential expression of cellular pathways for branches in patient 1 and patient 2 based on Cytoscape analysis. P1_I_II: samples p1.I-1, p1.I-2, p1.II-1, p1.II-2; P1_IV_V: samples p1.IV-1, p1.IV-2, p1.IV-3, p1.V-1; p2_I_II_VI: samples p2.I-1, p2.I-2, p2.II-2, p2.IV-1, p2.IV-2, p2.IV-3; P2_V_VII: samples p2.V-1, p2.VII-1, p2.VII-2, p2.VII-3; P3_all: samples p3.I, p3.II, p3…
Sample	Gene set	Ratio of protein	Number of protein	Protein	P-value	FDR	Nodes
sets		in gene set	in gene set	from network
P1_I_II vs P1_IV_V	Tight junction(K)	0.0143	132	9	0	0.006	INADL,CTNNA2,CGN,CLDN4,CLDN3,CLDN16,CLDN10,CLDN22,TJP3
P1_I_II vs P1_IV_V	Leukocyte transendothelial migration(K)	0.0126	116	9	0	0.008	RAPGEF3,CTNNA2,VAV3,CLDN4,CLDN3,CLDN16,CLDN10,PIK3R3,CLDN22
P1_I_II vs P1_IV_V	Cell-Cell communication(R)	0.0139	128	8	0.0001	0.0157	INADL,CLDN4,CLDN3,CLDN16,CDH1,CLDN10,CLDN22,CDH12
P1_I_II vs P1_IV_V	Post-translational protein modification(R)	0.022	203	9	0.0003	0.0335	MUC15,MUC1,MUC4,MUC5B,HIST3H2BB,WBSCR17,GALNT14,MUC20,MUC16
P1_I_II vs P1_IV_V	Iron uptake and transport(R)	0.0039	36	4	0.0006	0.036	SLC40A1,ATP6V1B1,ATP6V1C2,CP
P1_I_II vs P1_IV_V	Calcium signaling pathway(K)	0.0198	183	8	0.0007	0.0381	ADCY8,GRIN2A,ERBB4,ERBB3,CACNA1E,CACNA1D,CACNA1B,CALML5
P1_I_II vs P1_IV_V	ErbB receptor signaling network(N)	0.0016	15	3	0.0006	0.0392	BTC,ERBB4,ERBB3
P1_I_II vs P1_IV_V	Cell adhesion molecules (CAMs)(K)	0.0144	133	7	0.0005	0.0448	NCAM1,CLDN4,CLDN3,CLDN16,CDH1,CLDN10,CLDN22
P1_I_II vs P1_IV_V	Type II diabetes mellitus(K)	0.0052	48	4	0.0017	0.0722	CACNA1E,CACNA1D,CACNA1B,PIK3R3
P1_I_II vs P1_IV_V	Notch-mediated HES/HEY network(N)	0.0051	47	4	0.0016	0.0737	GATA4,HEY2,MYB,AR
P1_I_II vs P1_IV_V	Hepatitis C(K)	0.0142	131	6	0.0027	0.0754	CLDN4,CLDN3,CLDN16,CLDN10,PIK3R3,CLDN22
P1_I_II vs P1_IV_V	Signaling by ERBB2(R)	0.0189	175	7	0.0025	0.0784	ADCY8,BTC,FGFR3,ERBB4,ERBB3,GRB7,PIK3R3
P1_I_II vs P1_IV_V	ABC-family proteins mediated transport(R)	0.0027	25	3	0.0024	0.0808	APOA1,ABCA4,CFTR
P1_I_II vs P1_IV_V	ErbB signaling pathway(K)	0.0094	87	5	0.0023	0.0855	BTC,ERBB4,ERBB3,CBLC,PIK3R3
P1_I_II vs P1_IV_V	Phototransduction(K)	0.0031	29	3	0.0037	0.0942	CNGB1,CNGA1,CALML5
P1_IV_V vs P1_I_II	Focal adhesion(K)	0.0216	200	15	0	<1.00e-04	COL1A2,COL1A1,ITGB6,FN1,LAMA3,ITGA5,COL11A1,TNC,COL3A1,COMP,THBS1,THBS2,COL5A3,COL5A2,COL5A1
P1_IV_V vs P1_I_II	Protein digestion and absorption(K)	0.0088	81	10	0	<1.11e-04	CPA3,COL1A2,COL1A1,COL11A1,COL3A1,COL17A1,COL15A1,COL5A3,COL5A2,COL5A1
P1_IV_V vs P1_I_II	Beta3 integrin cell surface interactions(N)	0.0047	43	8	0	<1.25e-04	TGFBI,COL1A2,COL1A1,FN1,SPHK1,TNC,THBS1,FBN1
P1_IV_V vs P1_I_II	Integrin signalling pathway(P)	0.0171	158	16	0	<1.43e-04	COL10A1,COL1A2,COL1A1,ITGBL1,ITGB6,FN1,ITGA5,COL11A1,COL3A1,COL17A1,COL7A1,COL8A1,COL15A1,COL5A3,COL5A2,COL5A1
P1_IV_V vs P1_I_II	ECM-receptor interaction(K)	0.0092	85	17	0	<1.67e-04	CD36,COL1A2,COL1A1,ITGB6,FN1,LAMA3,ITGA5,SV2B,COL11A1,TNC,COL3A1,COMP,THBS1,THBS2,COL5A3,COL5A2,COL5A1
P1_IV_V vs P1_I_II	Immunoregulatory interactions between a Lymphoid and a non-Lymphoid cell(R)	0.0256	237	27	0	<2.00e-04	IGLV1-40,IGLV1-44,IGKV1-5,IGLV7-43,IGKV4-1,IGLV3-27,IGLV3-25,IGLV3-22,IGLV3-12,IGKC,IGLV3-16,IGLV10-54,IGLV1-36,IGLV5-45,IGLV2-33,IGHV7-81,IGLC7,IGLV4-60,IGLV2-23,IGLV8-61,IGLV2-11,IGLV2-18,IGLV4-69,IGLV7-46,IGLC2,IGLC1,IGLC3
P1_IV_V vs P1_I_II	Beta1 integrin cell surface interactions(N)	0.0071	66	17	0	<2.50e-04	F13A1,TGFBI,COL1A2,COL1A1,FN1,LAMA3,ITGA5,COL11A1,TNC,COL3A1,COL7A1,TGM2,THBS1,THBS2,FBN1,COL5A2,COL5A1
P1_IV_V vs P1_I_II	Complement cascade(R)	0.0203	188	31	0	<3.33e-04	IGLV1-40,IGLV1-44,IGKV1-5,IGLV7-43,IGKV4-1,IGLV3-27,IGLV3-25,IGLV3-22,IGLV3-12,IGKC,IGLV3-16,IGLV10-54,IGLV1-36,IGLV5-45,IGLV2-33,IGHG1,IGHG2,IGHG3,IGHG4,IGHV7-81,IGLC7,IGLV4-60,IGLV2-23,IGLV8-61,IGLV2-11,IGLV2-18,IGLV4-69,IGLV7-46,IGLC2,IGLC1,IGLC3
P1_IV_V vs P1_I_II	Extracellular matrix organization(R)	0.0183	169	36	0	<3.33e-04	MMP3,MMP2,MMP1,LOX,COL10A1,COL1A2,MFAP2,COL1A1,ADAMTS2,ITGB6,FN1,BMP2,EFEMP1,LAMA3,ITGA5,TPSAB1,TLL2,TLL1,LOXL2,COL11A1,MMP14,MMP13,MMP11,MMP10,CTSG,COL3A1,COL17A1,COL7A1,ACAN,COL8A1,FBN1,COL15A1,COL5A3,COL5A2,COL5A1,FBLN2
P1_IV_V vs P1_I_II	Fcgamma receptor (FCGR) dependent phagocytosis(R)	0.0253	234	31	0	<3.33e-04	IGLV1-40,IGLV1-44,IGKV1-5,IGLV7-43,IGKV4-1,IGLV3-27,IGLV3-25,IGLV3-22,IGLV3-12,IGKC,IGLV3-16,IGLV10-54,IGLV1-36,IGLV5-45,IGLV2-33,IGHG1,IGHG2,IGHG3,IGHG4,IGHV7-81,IGLC7,IGLV4-60,IGLV2-23,IGLV8-61,IGLV2-11,IGLV2-18,IGLV4-69,IGLV7-46,IGLC2,IGLC1,IGLC3
P1_IV_V vs P1_I_II	Amoebiasis(K)	0.0116	107	11	0	<9.09e-05	COL1A2,COL1A1,FN1,LAMA3,COL11A1,SERPINB4,CTSG,COL3A1,COL5A3,COL5A2,COL5A1
P1_IV_V vs P1_I_II	Cytokine-cytokine receptor interaction(K)	0.0287	265	17	0	8.33e-05	TNFRSF17,CNTFR,CCL7,BMP2,CXCL14,CXCL13,TNFRSF11B,CXCR5,INHBA,CXCL5,CXCL3,CCL23,CCL21,CCL19,CCL18,LEP,CCL13
P1_IV_V vs P1_I_II	Integrin cell surface interactions(R)	0.0096	89	9	0	0.0005	COL1A2,COL1A1,ITGB6,FN1,LAMA3,ITGA5,TNC,THBS1,FBN1
P1_IV_V vs P1_I_II	Alzheimer disease-presenilin pathway(P)	0.012	111	10	0	0.000538	MMP2,MMP1,ACTG2,WNT3,ACTA1,ACTA2,MMP14,MMP13,WNT11,ACTC1
P1_IV_V vs P1_I_II	Nicotinic acetylcholine receptor signaling pathway(P)	0.0024	22	5	0	0.000867	ACTG2,MYH13,ACTA1,ACTA2,ACTC1
P1_IV_V vs P1_I_II	TGF-beta signaling pathway(K)	0.0091	84	8	0.0001	0.0025	NOG,GDF6,PITX2,BMP2,INHBA,COMP,THBS1,THBS2
P1_IV_V vs P1_I_II	Syndecan-4-mediated signaling events(N)	0.0035	32	5	0.0003	0.00518	FN1,LAMA3,ITGA5,TNC,THBS1
P1_IV_V vs P1_I_II	Malaria(K)	0.0055	51	6	0.0003	0.0055	CD36,HBA1,COMP,THBS1,THBS2,HBB
P1_IV_V vs P1_I_II	GPCR ligand binding(R)	0.0446	412	18	0.0003	0.00563	F2RL2,EDN1,HTR1B,WNT3,HTR1D,BDKRB1,CCL7,CXCL13,ADRA1B,CXCR5,CCRL1,GRP,WNT11,CXCL5,CXCL3,CCL23,CCL21,CCL19
P1_IV_V vs P1_I_II	Validated transcriptional targets of AP1 family members Fra1 and Fra2(N)	0.004	37	5	0.0005	0.00971	MMP2,MMP1,COL1A2,LAMA3,FOSL1
P1_IV_V vs P1_I_II	Chemokine signaling pathway(K)	0.0205	189	11	0.0005	0.0102	CCL7,CXCL14,CXCL13,CXCR5,CXCL5,CXCL3,CCL23,CCL21,CCL19,CCL18,CCL13
P1_IV_V vs P1_I_II	Urokinase-type plasminogen activator (uPA) and uPAR-mediated signaling(N)	0.0045	42	5	0.0009	0.0157	MMP3,FN1,ITGA5,MMP13,CTSG
P1_IV_V vs P1_I_II	Alpha9 beta1 integrin signaling events(N)	0.0026	24	4	0.0009	0.016	F13A1,FN1,TNC,TGM2
P1_IV_V vs P1_I_II	VEGFR3 signaling in lymphatic endothelium(N)	0.0027	25	4	0.001	0.0168	COL1A2,COL1A1,FN1,ITGA5
P1_IV_V vs P1_I_II	Wnt signaling pathway(P)	0.0294	272	13	0.001	0.0172	EDN1,ACTG2,WNT3,SFRP2,MYH13,ACTA1,ACTA2,PCDH9,WNT11,FAT3,ACTC1,CDH13,DKK1
P1_IV_V vs P1_I_II	Signaling by the B Cell Receptor (BCR)(R)	0.0382	353	15	0.0013	0.0215	FGF10,IGHM,IGKV1-5,IGHD,IGKV4-1,BLK,IGKC,KLB,CD79A,IGHV7-81,IGLC7,FGF1,IGLC2,IGLC1,IGLC3
P1_IV_V vs P1_I_II	AP-1 transcription factor network(N)	0.0075	69	6	0.0014	0.0219	EDN1,MMP1,COL1A2,FABP4,FOSL1,ACTA1
P1_IV_V vs P1_I_II	Platelet Adhesion to exposed collagen(R)	0.0016	15	3	0.0024	0.0367	CD36,COL1A2,COL1A1
P1_IV_V vs P1_I_II	Signaling by PDGF(R)	0.0219	202	10	0.0029	0.0438	FGF10,COL1A2,COL1A1,KLB,FGF1,COL3A1,THBS1,THBS2,COL5A2,COL5A1
P1_IV_V vs P1_I_II	Beta5 beta6 beta7 and beta8 integrin cell surface interactions(N)	0.0018	17	3	0.0034	0.0488	ITGB6,FN1,FBN1
P1_IV_V vs P1_I_II	IL4-mediated signaling events(N)	0.0068	63	5	0.0051	0.0715	IGHE,COL1A2,COL1A1,IGHG1,IGHG3
P2_I_II_VI vs P2_V_VII	Neuroactive ligand-receptor interaction(K)	0.0295	273	29	0	<1.00e-03	LHCGR,LPAR4,GRIN3A,AGTR2,GRIN2B,CHRNA1,HTR1D,SSTR2,CHRNB4,CHRNB2,CHRND,UTS2R,CHRNG,EDNRB,GRM3,GRM7,OPRK1,GRIA1,HTR2C,GABRB3,GRIK3,GLP2R,GLP1R,DRD1,CNR1,GABRA3,GABRA5,GABRG3,CHRM2
P2_I_II_VI vs P2_V_VII	Cadherin signaling pathway(P)	0.0108	100	12	0	<1.00e-04	PCDH20,PCDH15,PCDH18,FAT3,WNT8B,FZD9,FZD7,CDH15,WNT3A,WNT1,PCDH9,PCDH8
P2_I_II_VI vs P2_V_VII	Hedgehog signaling pathway(K)	0.0061	56	10	0	<1.11e-04	SHH,BMP5,GLI1,HHIP,WNT8B,PTCH1,PTCH2,WNT3A,ZIC2,WNT1
P2_I_II_VI vs P2_V_VII	Basal cell carcinoma(K)	0.006	55	10	0	<1.25e-04	SHH,GLI1,HHIP,WNT8B,FZD9,FZD7,PTCH1,PTCH2,WNT3A,WNT1
P2_I_II_VI vs P2_V_VII	Nicotine addiction(K)	0.0043	40	9	0	<1.43e-04	GRIN3A,GRIN2B,SLC32A1,CHRNB2,GRIA1,GABRB3,GABRA3,GABRA5,GABRG3
P2_I_II_VI vs P2_V_VII	Wnt signaling pathway(P)	0.0294	272	22	0	<1.67e-04	GNG3,MYH3,MYH7,MYH8,PCDH20,PCDH15,PCDH18,SFRP1,ACTA1,FAT3,WNT8B,FZD9,ACTC1,FZD7,DKK1,CDH15,WNT3A,WNT1,PCDH9,PCDH8,CDH4,CDH7
P2_I_II_VI vs P2_V_VII	Axon guidance(R)	0.0288	266	22	0	<2.00e-04	SCN3A,SCN1A,CDK5R1,CACNB4,TRPC4,SLIT1,GFRA1,HFE2,ANK2,ROBO2,UNC5D,NCAM1,CACNA1S,CACNA1G,PAK7,SCN7A,KCNQ2,CNTN2,NCAN,DCC,DPYSL5,DPYSL4
P2_I_II_VI vs P2_V_VII	GPCR ligand binding(R)	0.0446	412	30	0	<2.50e-04	EDN3,LHCGR,LPAR4,SHH,AGTR2,GNG3,HTR1D,SSTR2,PENK,UTS2R,EDNRB,GRM3,GRM7,OPRK1,WNT8B,FZD9,FZD7,PTCH1,PTCH2,HTR2C,WNT3A,WNT1,GLP2R,RGR,GLP1R,DRD1,CNR1,CHRM2,TAC3,CALCA
P2_I_II_VI vs P2_V_VII	Muscle contraction(R)	0.0053	49	13	0	<3.33e-04	MYH3,MYH8,TNNI1,TNNI2,MYBPC1,TNNC2,TTN,ACTN2,TNNT2,TNNT3,MYL4,MYL1,NEB
P2_I_II_VI vs P2_V_VII	Transmission across Chemical Synapses(R)	0.0197	182	23	0	<5.00e-04	ADCY2,GRIN2B,GNG3,CHRNA1,CACNB4,KCNJ2,SLC32A1,GAD2,GAD1,KCNJ6,CHRNB4,CHRNB2,CHRND,CHRNG,GRIA1,GABRB3,GRIK3,ACTN2,GABRA3,GABRA5,CACNA1E,SLC1A2,GABRG3
P2_I_II_VI vs P2_V_VII	Ion channel transport(R)	0.0061	56	9	0	0.000154	KCNJ2,KCNJ6,ATP2A1,ATP1A3,ATP1A2,GABRB3,GABRA3,GABRA5,GABRG3
P2_I_II_VI vs P2_V_VII	GABAergic synapse(K)	0.0096	89	11	0	0.000167	ADCY2,GNG3,SLC32A1,GAD2,GAD1,KCNJ6,GABRB3,GABRA3,GABRA5,CACNA1S,GABRG3
P2_I_II_VI vs P2_V_VII	Mucopolysaccharidoses(R)	0.0115	106	12	0	0.000182	OGN,HS3ST3B1,SDC2,GPC4,GPC5,GPC3,GPC6,CHST2,NCAN,HS3ST4,HS6ST3,HS6ST2
P2_I_II_VI vs P2_V_VII	Cell adhesion molecules (CAMs)(K)	0.0144	133	13	0	0.000357	NLGN1,NLGN3,CDH15,NCAM1,ITGA8,SDC2,CNTNAP2,NRXN2,NRXN1,CNTN2,JAM2,JAM3,CDH4
P2_I_II_VI vs P2_V_VII	Retrograde endocannabinoid signaling(K)	0.011	102	11	0	0.000467	ADCY2,GNG3,SLC32A1,KCNJ6,GRIA1,GABRB3,CNR1,GABRA3,GABRA5,CACNA1S,GABRG3
P2_I_II_VI vs P2_V_VII	Wnt signaling network(N)	0.003	28	6	0	0.00125	FZD9,FZD7,DKK1,WNT3A,WNT1,WIF1
P2_I_II_VI vs P2_V_VII	Nicotinic acetylcholine receptor signaling pathway(P)	0.0024	22	5	0.0001	0.00412	MYH3,MYH7,MYH8,ACTA1,ACTC1
P2_I_II_VI vs P2_V_VII	Dilated cardiomyopathy(K)	0.0098	91	9	0.0001	0.00478	ADCY2,MYH7,CACNB4,LAMA2,ACTC1,TTN,TNNT2,CACNA1S,ITGA8
P2_I_II_VI vs P2_V_VII	Morphine addiction(K)	0.01	92	9	0.0001	0.00495	ADCY2,GNG3,SLC32A1,KCNJ6,GABRB3,DRD1,GABRA3,GABRA5,GABRG3
P2_I_II_VI vs P2_V_VII	Heterotrimeric G-protein signaling pathway-Gi alpha and Gs alpha mediated pathway(P)	0.0159	147	11	0.0003	0.0073	ADCY2,GNG3,HTR1D,SSTR2,KCNJ6,GRM3,GRM7,OPRK1,HTR2C,DRD1,CHRM2
P2_I_II_VI vs P2_V_VII	Hypertrophic cardiomyopathy (HCM)(K)	0.009	83	8	0.0004	0.00895	MYH7,CACNB4,LAMA2,ACTC1,TTN,TNNT2,CACNA1S,ITGA8
P2_I_II_VI vs P2_V_VII	Calcium signaling pathway(K)	0.0198	183	12	0.0005	0.00991	ADCY2,LHCGR,ATP2A1,EDNRB,HTR2C,SLC8A3,TNNC2,DRD1,CACNA1S,CACNA1G,CACNA1E,CHRM2
P2_I_II_VI vs P2_V_VII	Heterotrimeric G-protein signaling pathway-Gq alpha and Go alpha mediated pathway(P)	0.0117	108	9	0.0004	0.0103	GNG3,SSTR2,KCNJ6,GRM3,GRM7,OPRK1,DRD1,CACNA1E,CHRM2
P2_I_II_VI vs P2_V_VII	Cholinergic synapse(K)	0.0121	112	9	0.0006	0.0117	ADCY2,GNG3,KCNJ2,KCNJ6,CHRNB4,CHRNB2,CACNA1S,KCNQ2,CHRM2
P2_I_II_VI vs P2_V_VII	Cardiac muscle contraction(K)	0.0083	77	7	0.0012	0.0221	MYH7,CACNB4,ACTC1,ATP1A3,ATP1A2,TNNT2,CACNA1S
P2_I_II_VI vs P2_V_VII	Glutamatergic synapse(K)	0.0136	126	9	0.0013	0.0236	ADCY2,GRIN3A,GRIN2B,GNG3,GRM3,GRM7,GRIA1,GRIK3,SLC1A2
P2_I_II_VI vs P2_V_VII	Signaling events mediated by the Hedgehog family(N)	0.0025	23	4	0.0014	0.0241	SHH,HHIP,PTCH1,PTCH2
P2_I_II_VI vs P2_V_VII	Axon guidance(K)	0.014	129	9	0.0015	0.0258	EPHA3,EPHA5,EPHA7,SLIT1,ROBO2,UNC5D,PAK7,DCC,DPYSL5
P2_I_II_VI vs P2_V_VII	Alzheimer disease-presenilin pathway(P)	0.012	111	8	0.0023	0.0383	ACTA1,MMP16,WNT8B,FZD9,ACTC1,FZD7,WNT3A,WNT1
P2_I_II_VI vs P2_V_VII	Metabolism of carbohydrates(R)	0.0241	223	12	0.0024	0.039	OGN,HS3ST3B1,SDC2,GPC4,GPC5,GPC3,GPC6,CHST2,NCAN,HS3ST4,HS6ST3,HS6ST2
P2_I_II_VI vs P2_V_VII	Myogenesis(R)	0.0031	29	4	0.0032	0.0498	MYF5,CDH15,MYOD1,CDH4
P2_I_II_VI vs P2_V_VII	Cocaine addiction(K)	0.0054	50	5	0.004	0.0591	GRIN3A,GRIN2B,CDK5R1,GRM3,DRD1
P2_I_II_VI vs P2_V_VII	Wnt signaling pathway(K)	0.0163	151	9	0.0043	0.0623	SFRP1,WNT8B,FZD9,FZD7,DKK1,WNT3A,WNT1,WIF1,GPC4
P2_I_II_VI vs P2_V_VII	Melanogenesis(K)	0.0109	101	7	0.0052	0.0692	ADCY2,EDNRB,WNT8B,FZD9,FZD7,WNT3A,WNT1
P2_I_II_VI vs P2_V_VII	Amyotrophic lateral sclerosis (ALS)(K)	0.0057	53	5	0.0051	0.0695	GRIN2B,GRIA1,SLC1A2,NEFM,PRPH2
P2_I_II_VI vs P2_V_VII	Pathways in cancer(K)	0.0352	325	14	0.0077	0.0957	SHH,LAMA2,FGF8,GLI1,HHIP,WNT8B,FZD9,FZD7,PTCH1,PTCH2,FGF19,WNT3A,WNT1,DCC
P2_I_II_VI vs P2_V_VII	TGF-beta signaling pathway(K)	0.0091	84	6	0.0083	0.0992	NOG,FST,PITX2,SMAD9,BMP5,THBS4
P2_I_II_VI vs P2_V_VII	Complement cascade(R)	0.0203	188	29	0	<1.00e-03	IGLV1-40,IGLV1-44,CFI,IGKV1-5,IGLV7-43,IGKV4-1,IGLV3-25,IGKC,IGLV10-54,IGLV1-36,CFB,IGHG1,IGHG2,IGHG3,IGHG4,IGLC7,IGLV4-60,IGLV2-23,IGLV8-61,IGLV2-11,IGLV2-18,IGLV4-69,C3,IGLV7-46,C2,IGLC2,IGLC1,IGLC3,IGLV4-3
P2_I_II_VI vs P2_V_VII	Hematopoietic cell lineage(K)	0.0096	89	11	0	<1.25e-04	CD3G,CD3E,HLA-DRA,ITGA3,CSF2RA,TNF,IL7R,CD9,CD2,IL6,CD19
P2_I_II_VI vs P2_V_VII	Mineral absorption(K)	0.0055	51	9	0	<1.43e-04	SLC34A2,VDR,TRPV6,MT1E,MT1H,MT1G,MT1F,MT1M,MT2A
P2_I_II_VI vs P2_V_VII	Rheumatoid arthritis(K)	0.01	92	12	0	<1.67e-04	MMP3,MMP1,HLA-DQA2,HLA-DRA,IL23A,HLA-DOB,LTB,ICAM1,TNF,CCL20,IL6,IL8
P2_I_II_VI vs P2_V_VII	IL23-mediated signaling events(N)	0.0039	36	9	0	<2.00e-04	CD3E,SOCS3,IL24,IL23A,ITGA3,IL18RAP,TNF,CXCL9,IL6
P2_I_II_VI vs P2_V_VII	Cytokine-cytokine receptor interaction(K)	0.0287	265	26	0	<2.50e-04	CXCL11,IL24,CCR8,CCR4,CCL4,CCL7,LIF,IL23A,TNFSF10,CXCL16,LTB,CSF2RA,IL18RAP,TNFRSF10A,IL20RA,TNF,CXCL3,CXCL2,CXCL9,IL7R,CCL20,IL2RG,IL6,IL8,CCL19,CCL11
P2_I_II_VI vs P2_V_VII	Fcgamma receptor (FCGR) dependent phagocytosis(R)	0.0253	234	26	0	<3.33e-04	IGLV1-40,IGLV1-44,CD3G,IGKV1-5,IGLV7-43,IGKV4-1,IGLV3-25,IGKC,IGLV10-54,IGLV1-36,IGHG1,IGHG2,IGHG3,IGHG4,IGLC7,IGLV4-60,IGLV2-23,IGLV8-61,IGLV2-11,IGLV2-18,IGLV4-69,IGLV7-46,IGLC2,IGLC1,IGLC3,IGLV4-3
P2_I_II_VI vs P2_V_VII	Immunoregulatory interactions between a Lymphoid and a non-Lymphoid cell(R)	0.0256	237	27	0	<5.00e-04	IGLV1-40,IGLV1-44,TRAC,CD3G,CD3E,IGKV1-5,IGLV7-43,IGKV4-1,IGLV3-25,IGKC,IGLV10-54,IGLV1-36,IGLC7,IGLV4-60,IGLV2-23,IGLV8-61,ICAM1,IGLV2-11,IGLV2-18,IGLV4-69,C3,IGLV7-46,CD19,IGLC2,IGLC1,IGLC3,IGLV4-3
P2_I_II_VI vs P2_V_VII	Validated transcriptional targets of AP1 family members Fra1 and Fra2(N)	0.004	37	7	0	0.0001	MMP1,LIF,PLAU,FOSL1,NFATC1,IL6,IL8
P2_I_II_VI vs P2_V_VII	AP-1 transcription factor network(N)	0.0075	69	9	0	0.000111	MMP1,ATF3,PLAU,FOSL1,ESR1,NFATC1,IL6,IL8,MT2A
P2_I_II_VI vs P2_V_VII	NF-kappa B signaling pathway(K)	0.01	92	10	0	0.000182	CCL4,PLAU,LTB,ICAM1,GADD45B,TNF,CXCL2,IL8,CCL19,BIRC3
P2_I_II_VI vs P2_V_VII	Staphylococcus aureus infection(K)	0.0061	56	8	0	0.00025	CFI,HLA-DQA2,HLA-DRA,HLA-DOB,CFB,ICAM1,C3,C2
P2_I_II_VI vs P2_V_VII	Chemokine signaling pathway(K)	0.0205	189	13	0	0.000462	CXCL11,CCR8,CCR4,CCL4,CCL7,CXCL16,CXCL3,CXCL2,CXCL9,CCL20,IL8,CCL19,CCL11
P2_I_II_VI vs P2_V_VII	African trypanosomiasis(K)	0.0039	36	6	0	0.00143	F2RL1,APOA1,APOL1,ICAM1,TNF,IL6
P2_I_II_VI vs P2_V_VII	Glucocorticoid receptor regulatory network(N)	0.0083	77	8	0	0.0018	MMP1,KRT17,KRT14,ICAM1,SFN,NFATC1,IL6,IL8
P2_I_II_VI vs P2_V_VII	ATF-2 transcription factor network(N)	0.0063	58	7	0	0.00213	SOCS3,IL23A,ATF3,PLAU,ESR1,IL6,IL8
P2_I_II_VI vs P2_V_VII	IL12-mediated signaling events(N)	0.0065	60	7	0.0001	0.00235	CD3G,CD3E,HLA-DRA,CCL4,IL18RAP,GADD45B,IL2RG
P2_I_II_VI vs P2_V_VII	Influenza A(K)	0.0188	174	11	0.0001	0.00417	SOCS3,HLA-DQA2,HLA-DRA,HLA-DOB,TNFSF10,ICAM1,TNFRSF10A,TNF,PRSS1,IL6,IL8
P2_I_II_VI vs P2_V_VII	Complement and coagulation cascades(K)	0.0075	69	7	0.0001	0.00421	SERPINE1,CFI,CFB,PLAU,SERPINA1,C3,C2
P2_I_II_VI vs P2_V_VII	Asthma(K)	0.0034	31	5	0.0002	0.00455	HLA-DQA2,HLA-DRA,HLA-DOB,TNF,CCL11
P2_I_II_VI vs P2_V_VII	Malaria(K)	0.0055	51	6	0.0002	0.00495	ICAM1,TNF,COMP,THBS2,IL6,IL8
P2_I_II_VI vs P2_V_VII	Jak-STAT signaling pathway(K)	0.0168	155	10	0.0002	0.00559	SOCS3,IL24,LIF,IL23A,CBLC,CSF2RA,IL20RA,IL7R,IL2RG,IL6
P2_I_II_VI vs P2_V_VII	Legionellosis(K)	0.006	55	6	0.0003	0.00635	TNF,C3,CXCL3,CXCL2,IL6,IL8
P2_I_II_VI vs P2_V_VII	GPCR ligand binding(R)	0.0446	412	17	0.0004	0.008	F2RL1,CXCL11,CCR8,CCR4,CCL4,CCL7,P2RY2,CXCL16,C3,CXCL3,CXCL2,CXCL9,CCL20,CCBP2,IL8,CCL19,CCL11
P2_I_II_VI vs P2_V_VII	activation of csk by camp-dependent protein kinase inhibits signaling through the t cell receptor(B)	0.0043	40	5	0.0005	0.011	CD3G,CD3E,CCL4,P2RY2,CCL11
P2_I_II_VI vs P2_V_VII	Downstream signaling in na&#xef;ve CD8+ T cells(N)	0.0068	63	6	0.0006	0.011	CD3G,CD3E,FOSL1,TNF,IL2RG,NFATC1
P2_I_II_VI vs P2_V_VII	IL4-mediated signaling events(N)	0.0068	63	6	0.0006	0.011	SOCS3,TFF3,IGHG1,IGHG3,IL2RG,CCL11
P2_I_II_VI vs P2_V_VII	Graft-versus-host disease(K)	0.0044	41	5	0.0006	0.0115	HLA-DQA2,HLA-DRA,HLA-DOB,TNF,IL6
P2_I_II_VI vs P2_V_VII	Lipid digestion, mobilization, and transport(R)	0.0052	48	5	0.0012	0.0194	APOA4,APOA1,APOC2,ALB,APOC3
P2_I_II_VI vs P2_V_VII	HTLV-I infection(K)	0.0285	263	12	0.0012	0.0196	CD3G,CD3E,HLA-DQA2,HLA-DRA,HLA-DOB,ATF3,FOSL1,ICAM1,TNF,IL2RG,NFATC1,IL6
P2_I_II_VI vs P2_V_VII	Pertussis(K)	0.008	74	6	0.0014	0.0203	IL23A,TNF,C3,C2,IL6,IL8
P2_I_II_VI vs P2_V_VII	Beta2 integrin cell surface interactions(N)	0.0031	29	4	0.0013	0.0205	ITGAX,PLAU,ICAM1,C3
P2_I_II_VI vs P2_V_VII	IL12 signaling mediated by STAT4(N)	0.0032	30	4	0.0015	0.0216	CD3G,CD3E,HLA-DRA,IL18RAP
P2_I_II_VI vs P2_V_VII	Chagas disease (American trypanosomiasis)(K)	0.0113	104	7	0.0016	0.0221	SERPINE1,CD3G,CD3E,TNF,C3,IL6,IL8
P2_I_II_VI vs P2_V_VII	amb2 Integrin signaling(N)	0.0034	31	4	0.0017	0.0226	PLAU,ICAM1,TNF,IL6
P2_I_II_VI vs P2_V_VII	Post-translational protein modification(R)	0.022	203	10	0.0018	0.0231	B3GNT3,MUC1,MUC2,MUC5AC,MUC5B,ST6GALNAC2,GALNT3,GALNT6,MUC20,MUC16
P2_I_II_VI vs P2_V_VII	NOD-like receptor signaling pathway(K)	0.0062	57	5	0.0025	0.0312	TNF,CXCL2,IL6,IL8,BIRC3
P2_I_II_VI vs P2_V_VII	Tuberculosis(K)	0.0195	180	9	0.0027	0.034	HLA-DQA2,HLA-DRA,VDR,IL23A,ITGAX,HLA-DOB,TNF,C3,IL6
P2_I_II_VI vs P2_V_VII	Validated nuclear estrogen receptor alpha network(N)	0.0066	61	5	0.0033	0.0384	PGR,NR0B2,TFF1,ESR1,C3
P2_I_II_VI vs P2_V_VII	Primary immunodeficiency(K)	0.004	37	4	0.0032	0.0386	CD3E,IL7R,IL2RG,CD19
P2_I_II_VI vs P2_V_VII	Allograft rejection(K)	0.0041	38	4	0.0035	0.0409	HLA-DQA2,HLA-DRA,HLA-DOB,TNF
P2_I_II_VI vs P2_V_VII	TCR signaling(R)	0.007	65	5	0.0043	0.0487	TRAC,CD3G,CD3E,HLA-DQA2,HLA-DRA
P2_I_II_VI vs P2_V_VII	HIF-1-alpha transcription factor network(N)	0.0071	66	5	0.0045	0.0502	SERPINE1,TFF3,BHLHE40,BHLHE41,NT5E
P2_I_II_VI vs P2_V_VII	Urokinase-type plasminogen activator (uPA) and uPAR-mediated signaling(N)	0.0045	42	4	0.005	0.0538	MMP3,SERPINE1,ITGA3,PLAU
P2_I_II_VI vs P2_V_VII	Type I diabetes mellitus(K)	0.0047	43	4	0.0054	0.0573	HLA-DQA2,HLA-DRA,HLA-DOB,TNF
P2_I_II_VI vs P2_V_VII	Leishmaniasis(K)	0.0079	73	5	0.0069	0.0618	HLA-DQA2,HLA-DRA,HLA-DOB,TNF,C3
P2_I_II_VI vs P2_V_VII	Toll-like receptor signaling pathway(K)	0.011	102	6	0.0065	0.0619	CXCL11,CCL4,TNF,CXCL9,IL6,IL8
P2_I_II_VI vs P2_V_VII	Extracellular matrix organization(R)	0.0183	169	8	0.0064	0.0623	MMP7,MMP3,MMP1,COL10A1,LAMC2,MMP11,PRSS1,COL8A1
P2_I_II_VI vs P2_V_VII	Calcineurin-regulated NFAT-dependent transcription in lymphocytes(N)	0.005	46	4	0.0068	0.0625	FOSL1,TNF,NFATC1,IL8
P2_I_II_VI vs P2_V_VII	Metabolism of steroid hormones and vitamins A and D(R)	0.005	46	4	0.0068	0.0625	APOA4,APOA1,APOC2,APOC3
P2_I_II_VI vs P2_V_VII	role of mef2d in t-cell apoptosis(B)	0.0025	23	3	0.0064	0.0631	CD3G,CD3E,NFATC1
P2_I_II_VI vs P2_V_VII	Costimulation by the CD28 family(R)	0.008	74	5	0.0073	0.0641	TRAC,CD3G,CD3E,HLA-DQA2,HLA-DRA
P2_I_II_VI vs P2_V_VII	Validated transcriptional targets of deltaNp63 isoforms(N)	0.0049	45	4	0.0063	0.0643	KRT14,VDR,ITGA3,SFN
P2_I_II_VI vs P2_V_VII	Intestinal immune network for IgA production(K)	0.0053	49	4	0.0085	0.0727	HLA-DQA2,HLA-DRA,HLA-DOB,IL6
P2_I_II_VI vs P2_V_VII	?-arrestins in gpcr desensitization(B)	0.0028	26	3	0.0089	0.0736	CCL4,P2RY2,CCL11
P2_I_II_VI vs P2_V_VII	activation of camp-dependent protein kinase pka(B)	0.0028	26	3	0.0089	0.0736	CCL4,P2RY2,CCL11
P2_I_II_VI vs P2_V_VII	T cell activation(P)	0.0088	81	5	0.0105	0.0845	CD3G,CD3E,HLA-DQA2,HLA-DRA,NFATC1
P2_I_II_VI vs P2_V_VII	Herpes simplex infection(K)	0.0199	184	8	0.0104	0.0855	SOCS3,HLA-DQA2,HLA-DRA,HLA-DOB,TNF,C3,POU2F3,IL6
P2_I_II_VI vs P2_V_VII	role of ?-arrestins in the activation and targeting of map kinases(B)	0.003	28	3	0.0108	0.086	CCL4,P2RY2,CCL11
P2_I_II_VI vs P2_V_VII	lck and fyn tyrosine kinases in initiation of tcr activation(B)	0.0011	10	2	0.0116	0.0909	CD3G,CD3E
P2_I_II_VI vs P2_V_VII	Signaling by the B Cell Receptor (BCR)(R)	0.0382	353	12	0.0123	0.0948	BTC,IGHM,IGKV1-5,IGKV4-1,IGKC,NRG4,IGLC7,NFATC1,CD19,IGLC2,IGLC1,IGLC3
P2_I_II_VI vs P2_V_VII	Salmonella infection(K)	0.0093	86	5	0.0133	0.0998	CCL4,CXCL3,CXCL2,IL6,IL8

## Sheet: GOenrichment_branches
Supplementary table 6. Expression differences branches vs branch. GO biological process enrichment. P1_I_II: samples p1.I-1, p1.I-2, p1.II-1, p1.II-2; P1_IV_V: samples p1.IV-1, p1.IV-2, p1.IV-3, p1.V-1; p2_I_II_VI: samples p2.I-1, p2.I-2, p2.II-2, p2.IV-1, p2.IV-2, p2.IV-3; P2_V_VII: samples p2.V-1, p2.VII-1, p2.VII-2, p2.VII-3; P3_all: samples p3.I, p3.II, p3.III, p3.IV, p3.V, p3.VI, p3.VII.
Sample	Gene set	Ratio of protein	Number of protein	Protein	P-value	FDR	Nodes
set		in gene set	in gene set	from network
P1_I_II	O-glycan processing	0.0055	56	7	0	<1.000e-03	MUC15,MUC1,MUC4,MUC5B,GALNT14,MUC20,MUC16
P1_I_II	calcium-independent cell-cell adhesion	0.002	20	5	0	0.0005	CLDN4,CLDN3,CLDN16,CLDN10,CLDN22
P1_I_II	epithelial cell differentiation	0.0036	37	5	0	0.009667	SIX1,WT1,ELF3,EHF,DMBT1
P1_I_II	mammary gland alveolus development	0.0014	14	3	0.0004	0.0986	ERBB4,AR,ESR1
P1_I_II	positive regulation of cardiac muscle cell proliferation	0.0014	14	3	0.0004	0.0986	GATA4,ERBB4,HEY2
P1_IV_V	collagen fibril organization	0.0033	34	15	0	<1.000e-03	LOX,COL1A2,COL1A1,ADAMTS2,GREM1,SFRP2,LOXL2,COL11A1,LUM,COL3A1,ACAN,DPT,COL5A3,COL5A2,COL5A1
P1_IV_V	extracellular matrix organization	0.0074	75	13	0	<5.000e-04	MMP3,MMP2,MMP1,TGFBI,TPSAB1,TNFRSF11B,COL11A1,MMP14,MMP13,MMP11,MMP10,SERPINB5,CTSG
P1_IV_V	immune response	0.0405	411	27	0	<3.333e-04	IGHM,IGKV1-5,IGHD,IGHE,IGKV4-1,CCL7,IGKC,IGJ,CXCL14,CXCL13,IGHG1,IGHG2,IGHG3,IGHG4,CCRL1,SERPINB4,CTSG,CXCL5,CXCL3,CCL23,CCL21,IGHA1,THBS1,CCL19,CCL18,CCL13,IGLC1
P1_IV_V	extracellular matrix disassembly	0.0027	27	9	0	<2.500e-04	MMP3,MMP2,MMP1,TPSAB1,MMP14,MMP13,MMP11,MMP10,CTSG
P1_IV_V	cell-cell signaling	0.0209	212	17	0	<2.000e-04	EDN1,TNFAIP6,GREM1,CCL7,BMP2,CXCL14,CXCL13,SFRP2,ADRA1B,BARX1,INHBA,CXCL5,CCL23,CCL21,FGFBP1,CCL18,CCL13
P1_IV_V	collagen catabolic process	0.0021	21	7	0	<1.667e-04	MMP3,MMP2,MMP1,ADAMTS2,MMP13,MMP11,MMP10
P1_IV_V	blood vessel development	0.0031	31	7	0	<1.429e-04	LOX,COL1A2,COL1A1,SPHK1,PAX6,COL3A1,COL5A1
P1_IV_V	skeletal system development	0.01	102	11	0	<1.250e-04	NOG,COL10A1,COL1A2,COL1A1,BMP2,TLL1,TNFRSF11B,COL3A1,COMP,FBN1,COL5A2
P1_IV_V	angiogenesis	0.0155	157	13	0	<1.111e-04	FGF10,MMP2,CTGF,TGFBI,HOXA3,FN1,ECM1,ITGA5,FGF1,MMP14,COL8A1,COL15A1,MEOX2
P1_IV_V	positive regulation of cell migration	0.0088	89	10	0	<1.000e-04	EDN1,COL1A1,CCL7,BMP2,SPHK1,FGF1,WNT11,THBS1,SNAI2,CDH13
P1_IV_V	cell adhesion	0.0341	346	19	0	<9.091e-05	TGFBI,TNFAIP6,CD36,ITGBL1,ITGB6,FN1,LAMA3,ITGA5,LOXL2,VCAN,TNC,COL7A1,COMP,THBS1,COL8A1,THBS2,DPT,COL15A1,COL5A1
P1_IV_V	response to mechanical stimulus	0.0041	42	7	0	<8.333e-05	TIMP3,BMP2,FOSL1,ACTA1,MMP14,MMP13,ACAN
P1_IV_V	osteoblast differentiation	0.0043	44	7	0	7.692e-05	NOG,TWIST1,COL1A1,BMP2,WNT11,MSX2,SNAI2
P1_IV_V	chondrocyte development	0.0009	9	4	0	0.0003571	SFRP2,COL11A1,MSX2,ACAN
P1_IV_V	cellular response to amino acid stimulus	0.0032	33	6	0	0.0003333	MMP3,MMP2,COL1A2,COL1A1,COL3A1,COL5A2
P1_IV_V	complement activation	0.0151	153	11	0	0.0009375	IGKV1-5,IGKV4-1,IGKC,IGHG1,IGHG2,IGHG3,IGHG4,IGLC7,IGLC2,IGLC1,IGLC3
P1_IV_V	embryonic skeletal system development	0.0023	23	5	0	0.0008824	NOG,COL1A1,HOXA3,HOXB9,WNT11
P1_IV_V	ossification	0.0056	57	7	0	0.0008333	CTGF,TWIST1,ECM1,COL11A1,MMP14,ACAN,SPARC
P1_IV_V	collagen biosynthetic process	0.0004	4	3	0	0.00075	COL1A1,COL3A1,COL5A1
P1_IV_V	endocardial cushion morphogenesis	0.0004	4	3	0	0.00075	TWIST1,BMP2,ISL1
P1_IV_V	negative regulation of canonical Wnt receptor signaling pathway	0.0057	58	7	0	0.0008571	NOG,GREM1,SFRP2,WNT11,ISL1,SNAI2,DKK1
P1_IV_V	complement activation, classical pathway	0.0155	157	11	0	0.0008182	IGKV1-5,IGKV4-1,IGKC,IGHG1,IGHG2,IGHG3,IGHG4,IGLC7,IGLC2,IGLC1,IGLC3
P1_IV_V	positive regulation of cell proliferation	0.0315	320	16	0	0.001043	EDN1,WNT3,CTGF,PRAME,CNTFR,GREM1,HOXA3,SFRP2,FGF1,FOSL1,CXCL5,TNC,CRLF1,FGFBP1,ISL1,LEP
P1_IV_V	response to organic cyclic compound	0.0084	85	8	0.0001	0.001625	FGF10,CTGF,TIMP3,FOSL1,MMP14,LUM,ACAN,CCL19
P1_IV_V	ureteric bud formation	0.0005	5	3	0.0001	0.001643	NOG,GDNF,GREM1
P1_IV_V	intramembranous ossification	0.0005	5	3	0.0001	0.001643	MMP2,COL1A1,CTSK
P1_IV_V	negative regulation of cartilage development	0.0005	5	3	0.0001	0.001643	NOG,WNT11,LEP
P1_IV_V	innervation	0.0005	5	3	0.0001	0.001643	GABRB2,GABRA5,ISL1
P1_IV_V	inflammatory response	0.0235	239	13	0.0001	0.002655	MS4A2,TNFAIP6,BDKRB1,CCL7,ITGB6,BMP2,SPHK1,CXCL3,CCL23,CCL21,CCL19,CCL18,CCL13
P1_IV_V	peptide cross-linking	0.0016	16	4	0.0001	0.002833	F13A1,FN1,COL3A1,THBS1
P1_IV_V	protein kinase C-activating G-protein coupled receptor signaling pathway	0.0032	32	5	0.0002	0.003387	EDN1,HTR1B,MS4A2,BDKRB1,SPHK1
P1_IV_V	anterior/posterior pattern specification	0.0072	73	7	0.0002	0.003313	HOXA3,HOXA4,HOXA5,HOXB9,BARX1,WNT11,MSX2
P1_IV_V	chemotaxis	0.0098	100	8	0.0002	0.003606	CCL7,CXCL14,FOSL1,CCRL1,CXCL5,CCL23,CCL18,CCL13
P1_IV_V	positive regulation of chemotaxis	0.0007	7	3	0.0002	0.003529	CCL21,THBS1,CCL19
P1_IV_V	proteolysis	0.0289	294	14	0.0002	0.004286	MMP3,MMP2,MMP1,CPA3,ADAMTS2,TPSAB1,TLL2,TLL1,MMP14,MMP13,MMP11,MMP10,CTSK,CTSG
P1_IV_V	limb development	0.0008	8	3	0.0003	0.005289	NOG,COMP,MEOX2
P1_IV_V	bone trabecula formation	0.0008	8	3	0.0003	0.005289	MMP2,COL1A1,MSX2
P1_IV_V	positive regulation of cell motility	0.0008	8	3	0.0003	0.005289	TWIST1,CCL21,CCL19
P1_IV_V	face morphogenesis	0.002	20	4	0.0003	0.005179	NOG,MMP2,COL1A1,DKK1
P1_IV_V	skin development	0.0036	37	5	0.0003	0.0051	ADAMTS2,COL3A1,COL5A3,COL5A2,COL5A1
P1_IV_V	positive regulation of angiogenesis	0.0058	59	6	0.0004	0.005805	TWIST1,SPHK1,ECM1,SFRP2,FGF1,THBS1
P1_IV_V	organ induction	0.0009	9	3	0.0004	0.005818	FGF10,GDNF,FGF1
P1_IV_V	response to gravity	0.0009	9	3	0.0004	0.005818	FOSL1,ACAN,SPARC
P1_IV_V	white fat cell differentiation	0.0009	9	3	0.0004	0.005818	FGF10,FABP4,SNAI2
P1_IV_V	lung development	0.0061	62	6	0.0005	0.007	CTGF,LOX,ADAMTS2,FGF1,MMP14,SPARC
P1_IV_V	wound healing, spreading of epidermal cells	0.001	10	3	0.0005	0.01362	ITGA5,MSX2,COL5A1
P1_IV_V	embryonic hindlimb morphogenesis	0.0024	24	4	0.0006	0.01424	WNT3,TWIST1,MMP13,MSX2
P1_IV_V	cell-matrix adhesion	0.0065	66	6	0.0006	0.01456	CTGF,ITGBL1,ITGB6,COL3A1,COL17A1,COL5A3
P1_IV_V	epithelial to mesenchymal transition	0.0025	25	4	0.0007	0.01483	NOG,BMP2,LOXL2,SNAI2
P1_IV_V	blood vessel remodeling	0.0026	26	4	0.0008	0.01525	HOXA3,ADRA1B,BGN,TGM2
P1_IV_V	negative regulation of BMP signaling pathway	0.0026	26	4	0.0008	0.01525	NOG,GREM1,SFRP2,DKK1
P1_IV_V	sensory perception of sound	0.0068	69	6	0.0008	0.01514	GABRB2,COCH,COL1A1,GABRA5,COL11A1,SNAI2
P1_IV_V	cartilage development	0.0045	46	5	0.0008	0.01523	NOG,EDN1,BMP2,MMP13,LUM
P1_IV_V	response to hypoxia	0.0158	160	9	0.001	0.01634	EDN1,MMP3,MMP2,BMP2,LOXL2,MMP14,MMP13,THBS1,LEP
P1_IV_V	positive regulation of gene expression	0.0097	99	7	0.001	0.01622	WNT3,CTGF,TWIST1,BMP2,PAX6,WNT11,TNC
P1_IV_V	response to wounding	0.0048	49	5	0.0011	0.01738	F2RL2,CTGF,FN1,PAX6,TNC
P1_IV_V	wound healing	0.0051	52	5	0.0014	0.02849	NOG,FGF10,MMP3,LOX,COL3A1
P1_IV_V	sprouting angiogenesis	0.0014	14	3	0.0014	0.02781	LOXL2,THBS1,CDH13
P1_IV_V	positive regulation of cell-matrix adhesion	0.0014	14	3	0.0014	0.02781	CD36,CCL21,CDH13
P1_IV_V	negative regulation of apoptotic process	0.0238	242	11	0.0015	0.02797	NOG,FGF10,PRAME,SPHK1,CIDEA,CXCL13,WNT11,MSX2,THBS1,SNAI2,LEP
P1_IV_V	embryonic skeletal system morphogenesis	0.0032	32	4	0.0017	0.02884	HOXA4,HOXA5,MDFI,COL11A1
P1_IV_V	positive regulation of cell death	0.0015	15	3	0.0018	0.02865	CTGF,HBA1,HBB
P1_IV_V	positive regulation of neutrophil chemotaxis	0.0015	15	3	0.0018	0.02865	EDN1,CCL21,CCL19
P1_IV_V	positive regulation of fat cell differentiation	0.0016	16	3	0.0021	0.0364	BMP2,SFRP2,SNAI2
P1_IV_V	cartilage condensation	0.0016	16	3	0.0021	0.0364	CTGF,COL11A1,ACAN
P1_IV_V	thyroid gland development	0.0016	16	3	0.0021	0.0364	FGF10,HOXA3,HOXA5
P1_IV_V	platelet activation	0.0178	181	9	0.0023	0.039	F2RL2,F13A1,CD36,COL1A2,COL1A1,FN1,COL3A1,THBS1,SPARC
P1_IV_V	gamma-aminobutyric acid signaling pathway	0.0017	17	3	0.0025	0.03898	GABRB2,GABRA5,GABRG3
P1_IV_V	positive regulation of NF-kappaB import into nucleus	0.0017	17	3	0.0025	0.03898	GREM1,SPHK1,CCL19
P1_IV_V	positive regulation of branching involved in ureteric bud morphogenesis	0.0017	17	3	0.0025	0.03898	NOG,GDNF,GREM1
P1_IV_V	response to hydrogen peroxide	0.0036	37	4	0.0028	0.04034	COL1A1,HBA1,FOSL1,HBB
P1_IV_V	cell migration	0.0088	89	6	0.0029	0.03617	CTGF,BDKRB1,HOXA5,FN1,THBS1,COL5A1
P1_IV_V	positive regulation of epithelial to mesenchymal transition	0.0018	18	3	0.0029	0.03642	TWIST1,COL1A1,BMP2
P1_IV_V	multicellular organismal development	0.03	305	12	0.0031	0.04043	TNFRSF17,ITGB6,ADRA1B,HOXB9,TLL2,PAX5,BARX1,FGF1,MMP11,VCAN,FAT3,MEOX2
P1_IV_V	integrin-mediated signaling pathway	0.0062	63	5	0.0032	0.04426	CTGF,ITGBL1,ITGB6,ITGA5,COL3A1
P1_IV_V	cellular response to retinoic acid	0.0039	40	4	0.0037	0.04774	WNT3,COL1A1,WNT11,LEP
P1_IV_V	cellular response to growth factor stimulus	0.0039	40	4	0.0037	0.04774	COL1A1,BMP2,MSX2,SPARC
P1_IV_V	embryonic forelimb morphogenesis	0.002	20	3	0.0039	0.0481	WNT3,TWIST1,MSX2
P1_IV_V	pituitary gland development	0.0021	21	3	0.0045	0.05171	NOG,FGF10,ISL1
P1_IV_V	bone mineralization	0.0021	21	3	0.0045	0.05171	BMP2,MMP13,WNT11
P1_IV_V	visual perception	0.0128	130	7	0.0045	0.05125	TGFBI,COL1A1,TIMP3,EFEMP1,PAX6,COL11A1,LUM
P1_IV_V	negative regulation of neuron apoptotic process	0.007	71	5	0.0053	0.05699	GDNF,PPARGC1A,CNTFR,CRLF1,ISL1
P1_IV_V	platelet degranulation	0.007	71	5	0.0053	0.05699	F13A1,CD36,FN1,THBS1,SPARC
P1_IV_V	positive regulation of pathway-restricted SMAD protein phosphorylation	0.0023	23	3	0.0058	0.05697	GDF6,BMP2,INHBA
P1_IV_V	spleen development	0.0023	23	3	0.0058	0.05697	FGF10,PITX2,BARX1
P1_IV_V	signal transduction	0.0882	896	24	0.0062	0.06398	GDNF,WNT3,TNFRSF17,TNFAIP6,CNTFR,CCL7,GABRA5,SPHK1,ECM1,CXCL14,CXCL13,SFRP2,TNFRSF11B,FGF1,GRP,CXCL5,TNC,CCL23,FGFBP1,COL15A1,SPARC,CCL18,CCL13,DKK1
P1_IV_V	positive regulation of tyrosine phosphorylation of Stat3 protein	0.0024	24	3	0.0065	0.06515	CRLF1,ISL1,LEP
P1_IV_V	response to amino acid stimulus	0.0024	24	3	0.0065	0.06515	EDN1,CTGF,TIMP3
P1_IV_V	outflow tract morphogenesis	0.0024	24	3	0.0065	0.06515	SFRP2,WNT11,ISL1
P1_IV_V	inner ear development	0.0025	25	3	0.0072	0.06453	BMP2,CXCL14,SPARC
P1_IV_V	mesoderm formation	0.0025	25	3	0.0072	0.06453	NOG,WNT3,DKK1
P1_IV_V	response to drug	0.0255	259	10	0.0077	0.0684	EDN1,HTR1B,LOX,SFRP2,TNFRSF11B,FOSL1,GABRG3,ACAN,THBS1,ACTC1
P1_IV_V	regulation of blood pressure	0.0049	50	4	0.0081	0.07224	COL1A2,ACTA2,HBB,LEP
P1_IV_V	heart development	0.011	112	6	0.0085	0.07462	EDN1,BMP2,VCAN,COL3A1,FBN1,SPARC
P1_IV_V	negative regulation of cell proliferation	0.0301	306	11	0.0088	0.07506	FGF10,BMP2,SFRP2,FOSL1,INHBA,XIRP1,MSX2,CCL23,FGFBP1,DPT,CDH13
P1_IV_V	response to radiation	0.0027	27	3	0.0089	0.0749	COL3A1,ACAN,SNAI2
P1_IV_V	cellular calcium ion homeostasis	0.0051	52	4	0.0092	0.07588	CCL7,CCL23,CCL19,CCL13
P1_IV_V	palate development	0.0052	53	4	0.0098	0.08173	INHBA,WNT11,SNAI2,MEOX2
P1_IV_V	growth	0.0028	28	3	0.0098	0.08128	GDF6,BMP2,INHBA
P1_IV_V	response to lipopolysaccharide	0.0115	117	6	0.0104	0.08556	EDN1,FGF10,MMP3,BDKRB1,CTSG,SPARC
P1_IV_V	positive regulation of transcription from RNA polymerase II promoter	0.0537	545	16	0.0113	0.08463	MYOD1,NOG,FGF10,GDNF,TWIST1,PITX2,PPARGC1A,GREM1,HOXA5,BMP2,SFRP2,HOXB9,PAX6,FGF1,INHBA,ISL1
P1_IV_V	negative regulation of Wnt receptor signaling pathway	0.003	30	3	0.0118	0.08685	MDFI,SFRP2,BARX1
P1_IV_V	odontogenesis	0.003	30	3	0.0118	0.08685	PITX2,COL1A2,INHBA
P1_IV_V	positive regulation of tumor necrosis factor production	0.003	30	3	0.0118	0.08685	TWIST1,CD36,CCL19
P1_IV_V	response to estrogen stimulus	0.0057	58	4	0.0133	0.08918	TIMP3,TNFRSF11B,MMP14,MMP13
P1_IV_V	embryonic digit morphogenesis	0.0032	32	3	0.014	0.09272	NOG,TWIST1,SFRP2
P1_IV_V	negative regulation of cell migration	0.0058	59	4	0.014	0.09217	NOG,SFRP2,WNT11,ACAN
P2_I_II_VI	muscle filament sliding	0.0036	37	16	0	<1.000e-03	MYH3,MYH7,MYH8,TNNI1,TNNI2,MYBPC1,ACTA1,ACTC1,TNNC2,TTN,ACTN2,TNNT2,TNNT3,MYL4,MYL1,NEB
P2_I_II_VI	synaptic transmission	0.033	335	33	0	<5.000e-04	ADCY2,GRIN2B,GNG3,CHRNA1,HTR1D,CACNB4,KCNJ2,SLC32A1,GAD2,GAD1,KCNJ6,CHRNB4,CHRNB2,CHRND,CHRNG,GRM3,GRM7,OPRK1,GRIA1,HTR2C,GABRB3,GRIK3,ACTN2,GABRA3,GABRA5,CACNA1G,CACNA1E,SLC1A2,KCNQ2,DLG2,GABRG3,PCDH8,PLP1
P2_I_II_VI	axon guidance	0.0287	291	28	0	<3.333e-04	SHH,CDK5R1,CACNB4,NKX2-1,TRPC4,EPHA5,EPHA7,DLX5,SLIT1,GFRA1,HFE2,WNT3A,ANK2,ROBO2,UNC5D,NCAM1,NEUROG2,CACNA1S,CACNA1G,KCNQ2,NRXN1,CNTN2,NGFR,NCAN,DCC,CDH4,DPYSL5,DPYSL4
P2_I_II_VI	muscle contraction	0.0077	78	13	0	<2.500e-04	MYH7,MYH8,CHRND,CHRNG,ACTA1,MYOM2,MYOM1,TTN,MYL1,CACNA1S,SCN7A,TRDN,HRC
P2_I_II_VI	osteoblast differentiation	0.0043	44	10	0	<2.000e-04	NOG,SFRP1,DLX5,GLI1,WNT3A,SOX2,SOX8,RSPO2,MSX2,SP7
P2_I_II_VI	positive regulation of transcription from RNA polymerase II promoter	0.0537	545	33	0	<1.667e-04	NOG,SHH,PITX2,NKX2-1,DLX2,DLX5,BMP5,TP63,GLI1,FOXC2,MYF5,NR5A2,MYOD1,WNT3A,ZIC3,WNT1,MYOCD,SATB2,SIX2,ASCL1,GLP1R,SOX2,BEX1,SOX8,HOXA1,NEUROG2,HOXB9,PAX6,PAX3,PAX1,POU4F1,EYA1,POU3F3
P2_I_II_VI	brain development	0.0123	125	14	0	0.0001429	AGTR2,CDK5R1,NKX2-1,PCDH18,DLX2,EPHA7,SFRP1,FZD9,FZD7,PTCH1,ZIC2,ROBO2,GABRA5,CNTNAP2
P2_I_II_VI	metanephros development	0.0025	25	7	0	0.000125	SHH,CITED1,FGF8,FOXC2,ROBO2,ITGA8,EYA1
P2_I_II_VI	behavioral fear response	0.0016	16	6	0	0.0001111	GRIN2B,PENK,GRM7,DRD1,GABRA5,CACNA1E
P2_I_II_VI	postsynaptic membrane assembly	0.0005	5	4	0	0.0003	NLGN1,NLGN3,NRXN2,NRXN1
P2_I_II_VI	regulation of heart rate	0.0012	12	5	0	0.0002727	MYH7,ANK2,CACNA1G,CACNA1E,CASQ2
P2_I_II_VI	positive regulation of transcription, DNA-dependent	0.043	437	25	0	0.00075	SHH,CITED1,AGTR2,PITX3,NKX2-1,SMAD9,MSTN,TNNI2,SFRP1,DLX5,TP63,GLI1,FOXC2,FZD7,WNT3A,ZIC3,ZIC2,WNT1,MYOCD,SOX2,SOX8,EBF1,PAX6,PAX3,POU3F3
P2_I_II_VI	muscle organ development	0.0066	67	9	0	0.0006923	MYH3,MSTN,LAMA2,MYF5,MYOD1,CAV3,MYL4,MYL1,NEB
P2_I_II_VI	null	0.0015	15	5	0	0.0006429	SSTR2,EDNRB,ANK2,CNR1,CASQ2
P2_I_II_VI	neuron cell-cell adhesion	0.0008	8	4	0	0.0008667	CDK5R1,NLGN1,NLGN3,CTNND2
P2_I_II_VI	response to ethanol	0.0073	74	9	0.0001	0.001563	GRIN3A,SHH,GRIN2B,NKX2-1,MSTN,CHRNB2,NPPC,ACTC1,CNR1
P2_I_II_VI	regulation of striated muscle contraction	0.0009	9	4	0.0001	0.001389	TNNI1,ATP2A1,ATP1A2,TNNT3
P2_I_II_VI	skeletal muscle contraction	0.0009	9	4	0.0001	0.001389	CHRNA1,TNNI2,TNNC2,TNNT3
P2_I_II_VI	postsynaptic density protein 95 clustering	0.0004	4	3	0.0001	0.003789	NLGN1,NRXN2,NRXN1
P2_I_II_VI	neuron differentiation	0.0063	64	8	0.0001	0.003476	EDN3,CDK5R1,NTRK2,WNT8B,FZD7,WNT3A,POU3F2,PTPRD
P2_I_II_VI	neuron migration	0.0063	64	8	0.0001	0.003476	CDK5R1,NKX2-1,NTRK2,SATB2,ASCL1,NEUROG2,CNTN2,DCC
P2_I_II_VI	memory	0.0032	33	6	0.0001	0.003318	MUSK,CHRNB2,GLP1R,DRD1,CNR1,ITGA8
P2_I_II_VI	pituitary gland development	0.0021	21	5	0.0001	0.003348	NOG,NKX2-1,GLI1,SOX3,SOX2
P2_I_II_VI	canonical Wnt receptor signaling pathway	0.0065	66	8	0.0001	0.003583	SHH,SFRP1,WNT8B,FZD9,FZD7,WNT3A,WNT1,HOXB9
P2_I_II_VI	neuroblast proliferation	0.0012	12	4	0.0002	0.00412	SHH,HHIP,FZD9,ASCL1
P2_I_II_VI	homophilic cell adhesion	0.0126	128	11	0.0002	0.004077	PCDH20,PCDH15,PCDH18,FAT3,FAT4,CDH15,ROBO2,PCDH9,PCDH8,CDH4,CDH7
P2_I_II_VI	sensory perception of sound	0.0068	69	8	0.0002	0.005333	PCDH15,CHRNB2,GRM7,HOXA1,GABRA5,PAX3,EYA1,POU3F4
P2_I_II_VI	embryonic skeletal system development	0.0023	23	5	0.0002	0.005143	NOG,SHH,DLK1,HOXA9,HOXB9
P2_I_II_VI	somitogenesis	0.0036	37	6	0.0002	0.005724	SFRP1,FOXC2,MYF5,WNT3A,PAX1,PCDH8
P2_I_II_VI	conditioned taste aversion	0.0005	5	3	0.0002	0.005387	CHRNB2,GRM7,DRD1
P2_I_II_VI	skeletal muscle thin filament assembly	0.0005	5	3	0.0002	0.005387	ACTA1,ACTC1,TTN
P2_I_II_VI	positive regulation of synaptic transmission, glutamatergic	0.0013	13	4	0.0002	0.005438	NLGN1,NLGN3,DRD1,NRXN1
P2_I_II_VI	activation of adenylate cyclase activity	0.0025	25	5	0.0003	0.005647	LHCGR,NTRK2,GLP1R,DRD1,CALCA
P2_I_II_VI	visual learning	0.0025	25	5	0.0003	0.005647	CHRNB2,NLGN3,ATP1A2,DRD1,CACNA1E
P2_I_II_VI	retinal ganglion cell axon guidance	0.0014	14	4	0.0003	0.006472	EPHA7,SLIT1,ZIC2,ROBO2
P2_I_II_VI	associative learning	0.0014	14	4	0.0003	0.006472	GRIN2B,CHRNB2,GLP1R,GABRA5
P2_I_II_VI	G-protein coupled receptor signaling pathway, coupled to cyclic nucleotide second messenger	0.0039	40	6	0.0003	0.006946	LHCGR,HTR1D,SSTR2,DRD1,CNR1,CHRM2
P2_I_II_VI	dorsal/ventral pattern formation	0.0026	26	5	0.0003	0.00665	NOG,SHH,GLI1,HHIP,PTCH1
P2_I_II_VI	neural crest cell migration	0.0026	26	5	0.0003	0.00665	EDN3,SHH,EDNRB,FGF19,SOX8
P2_I_II_VI	regulation of calcium ion transport via voltage-gated calcium channel activity	0.0026	26	5	0.0003	0.00665	CACNB4,ANK2,CAV3,CACNA1S,CACNA1E
P2_I_II_VI	presynaptic membrane assembly	0.0006	6	3	0.0004	0.00669	NLGN1,NLGN3,PTPRD
P2_I_II_VI	cerebral cortex radially oriented cell migration	0.0006	6	3	0.0004	0.00669	CDK5R1,POU3F3,POU3F2
P2_I_II_VI	positive regulation of Notch signaling pathway	0.0015	15	4	0.0004	0.006659	TP63,WNT1,ASCL1,EYA1
P2_I_II_VI	positive regulation of blood pressure	0.0015	15	4	0.0004	0.006659	UTS2R,GLP1R,CNR1,TAC3
P2_I_II_VI	nervous system development	0.0239	243	15	0.0004	0.006956	NOG,DLX5,EDNRB,WNT8B,FZD9,NLGN1,ELAVL3,FGF19,DSCAM,BEX1,ITGA8,KCNQ2,CHRM2,DPYSL5,DPYSL4
P2_I_II_VI	positive regulation of gene expression	0.0097	99	9	0.0004	0.007022	CITED1,MUSK,NKX2-1,NTRK2,WNT8B,ANK2,PAX6,POU3F3,PLP1
P2_I_II_VI	learning	0.0028	28	5	0.0005	0.007277	NTRK2,CHRNB2,NRXN1,CNTN2,CTNND2
P2_I_II_VI	proximal/distal pattern formation	0.0016	16	4	0.0005	0.008082	DLX2,TP63,GLI1,HOXA9
P2_I_II_VI	regulation of neuron differentiation	0.0016	16	4	0.0005	0.008082	NOG,CDK5R1,NLGN1,EYA1
P2_I_II_VI	forebrain development	0.0043	44	6	0.0005	0.0082	SHH,SSTR2,NKX2-1,DKK1,SOX2,NEUROG2
P2_I_II_VI	regulation of microtubule cytoskeleton organization	0.0007	7	3	0.0006	0.008057	CDK5R1,EPHA3,WNT3A
P2_I_II_VI	neuromuscular process	0.0007	7	3	0.0006	0.008057	CHRNA1,CHRND,HOXA1
P2_I_II_VI	somite development	0.0007	7	3	0.0006	0.008057	NOG,SHH,PTCH1
P2_I_II_VI	cellular protein localization	0.003	30	5	0.0006	0.008426	WNT3A,ANK2,CNTNAP2,EYA1,CNTN2
P2_I_II_VI	ion transmembrane transport	0.0045	46	6	0.0007	0.008564	ATP2A1,ATP1A2,GABRB3,GABRA3,GABRA5,GABRG3
P2_I_II_VI	motor axon guidance	0.0018	18	4	0.0008	0.01029	NOG,KIF5C,SLIT1,HOXA1
P2_I_II_VI	cellular response to estradiol stimulus	0.0008	8	3	0.0008	0.01179	SSTR2,SFRP1,MSX2
P2_I_II_VI	adult behavior	0.0008	8	3	0.0008	0.01179	GRM7,SLC1A2,NRXN1
P2_I_II_VI	negative regulation of adenylate cyclase activity	0.0019	19	4	0.0009	0.0213	EDNRB,GRM3,GRM7,NPR3
P2_I_II_VI	vasculature development	0.0019	19	4	0.0009	0.0213	SFRP1,FZD9,FZD7,CALCA
P2_I_II_VI	embryonic limb morphogenesis	0.0032	33	5	0.001	0.02084	SHH,DLX5,TP63,PTCH1,SP9
P2_I_II_VI	hippocampus development	0.0032	33	5	0.001	0.02084	GRIN2B,NKX2-1,EPHA5,DLX2,WNT3A
P2_I_II_VI	regulation of blood pressure	0.0049	50	6	0.001	0.01927	AGTR2,EDNRB,NPPC,NPR3,ATP1A2,CALCA
P2_I_II_VI	embryonic forelimb morphogenesis	0.002	20	4	0.0011	0.02021	SHH,HOXA9,RSPO2,MSX2
P2_I_II_VI	axis specification	0.0009	9	3	0.0012	0.01919	WNT8B,WNT3A,WNT1
P2_I_II_VI	Wnt receptor signaling pathway, calcium modulating pathway	0.0009	9	3	0.0012	0.01919	FZD7,WNT3A,WNT1
P2_I_II_VI	positive regulation of excitatory postsynaptic membrane potential	0.0009	9	3	0.0012	0.01919	NLGN1,NLGN3,NRXN1
P2_I_II_VI	spinal cord association neuron differentiation	0.0009	9	3	0.0012	0.01919	WNT3A,WNT1,ASCL1
P2_I_II_VI	central nervous system development	0.0091	92	8	0.0012	0.01936	LHCGR,SHH,ROBO2,SOX3,PAX6,SHC3,NGFR,POU3F3
P2_I_II_VI	locomotory behavior	0.0052	53	6	0.0013	0.02018	PITX3,NKX2-1,CHRNB4,CHRNB2,DSCAM,CACNA1E
P2_I_II_VI	gonad development	0.0021	21	4	0.0014	0.01982	SFRP1,FGF8,FZD9,FZD7
P2_I_II_VI	embryonic pattern specification	0.0021	21	4	0.0014	0.01982	SHH,WNT3A,WNT1,SATB2
P2_I_II_VI	branching involved in ureteric bud morphogenesis	0.0035	36	5	0.0014	0.02005	SHH,CITED1,PTCH1,WNT1,EYA1
P2_I_II_VI	anterior/posterior pattern specification	0.0072	73	7	0.0014	0.01991	SHH,WNT8B,ZIC3,HOXA1,HOXA9,HOXB9,MSX2
P2_I_II_VI	multicellular organismal development	0.03	305	16	0.0015	0.02038	EDN3,HOXA10,ZNF521,FAT3,DLK1,HOXC6,HOXA1,HOXA9,EBF3,EBF2,EBF1,HOXB9,WIF1,PAX7,CHST2,CTNND2
P2_I_II_VI	dorsal/ventral neural tube patterning	0.001	10	3	0.0016	0.02018	SHH,PTCH1,WNT3A
P2_I_II_VI	adenylate cyclase-modulating G-protein coupled receptor signaling pathway	0.0036	37	5	0.0016	0.02008	ADCY2,LHCGR,GLP2R,CNR1,CHRM2
P2_I_II_VI	hair follicle morphogenesis	0.0022	22	4	0.0016	0.01991	FST,SHH,TP63,NGFR
P2_I_II_VI	ephrin receptor signaling pathway	0.0022	22	4	0.0016	0.01991	CDK5R1,EPHA3,EPHA5,EPHA7
P2_I_II_VI	sensory perception of pain	0.0037	38	5	0.0018	0.02154	PENK,CHRNB2,CNR1,CACNA1E,DLG2
P2_I_II_VI	ventricular cardiac muscle tissue morphogenesis	0.0023	23	4	0.0019	0.02715	MYH7,TNNI1,FOXC2,TNNT2
P2_I_II_VI	prepulse inhibition	0.0011	11	3	0.002	0.034	GRIN3A,DRD1,NRXN1
P2_I_II_VI	regulation of action potential in neuron	0.0011	11	3	0.002	0.034	CHRNA1,SCN1A,DRD1
P2_I_II_VI	anatomical structure morphogenesis	0.0077	78	7	0.002	0.03366	FGF8,WNT3A,SIX2,HOXA1,GPC4,GPC3,EYA1
P2_I_II_VI	negative regulation of canonical Wnt receptor signaling pathway	0.0057	58	6	0.0021	0.03426	NOG,SHH,SFRP1,GLI1,DKK1,SOX2
P2_I_II_VI	pattern specification process	0.0039	40	5	0.0022	0.02961	FST,SHH,BMP5,ASCL1,EYA1
P2_I_II_VI	skeletal system development	0.01	102	8	0.0023	0.02997	NOG,DLX5,BMP5,TP63,NPR3,COL19A1,CACNA1S,PAX1
P2_I_II_VI	regulation of heart contraction	0.0025	25	4	0.0026	0.03092	TNNT2,CAV3,CHRM2,HRC
P2_I_II_VI	keratinocyte proliferation	0.0012	12	3	0.0026	0.03032	FST,TP63,PTCH1
P2_I_II_VI	epithelial tube branching involved in lung morphogenesis	0.0012	12	3	0.0026	0.03032	NKX2-1,HHIP,RSPO2
P2_I_II_VI	negative regulation of epithelial to mesenchymal transition	0.0012	12	3	0.0026	0.03032	NKX2-1,SFRP1,BMP5
P2_I_II_VI	negative regulation of cell differentiation	0.0013	13	3	0.0033	0.03618	FST,SHH,SIX2
P2_I_II_VI	negative regulation of smoothened signaling pathway	0.0013	13	3	0.0033	0.03618	HHIP,PTCH1,PTCH2
P2_I_II_VI	positive regulation of smoothened signaling pathway	0.0013	13	3	0.0033	0.03618	SHH,SFRP1,GLI1
P2_I_II_VI	eye development	0.0013	13	3	0.0033	0.03618	WNT8B,SOX2,PAX6
P2_I_II_VI	midbrain development	0.0027	27	4	0.0034	0.03938	SHH,PITX3,SMAD9,WNT1
P2_I_II_VI	smoothened signaling pathway	0.0027	27	4	0.0034	0.03938	SHH,GLI1,HHIP,PTCH1
P2_I_II_VI	behavior	0.0028	28	4	0.0038	0.04306	AGTR2,OPRK1,CNR1,CNTNAP2
P2_I_II_VI	camera-type eye development	0.0028	28	4	0.0038	0.04306	SHH,PITX2,FOXC2,MYF5
P2_I_II_VI	negative regulation of osteoblast differentiation	0.0028	28	4	0.0038	0.04306	NOG,CITED1,SFRP1,PTCH1
P2_I_II_VI	central nervous system neuron development	0.0014	14	3	0.004	0.04204	NTRK2,ASCL1,NEUROG2
P2_I_II_VI	striated muscle contraction	0.0014	14	3	0.004	0.04204	TTN,CACNA1S,CASQ2
P2_I_II_VI	regulation of vasoconstriction	0.0014	14	3	0.004	0.04204	EDN3,NPPC,ATP1A2
P2_I_II_VI	regulation of smooth muscle contraction	0.0014	14	3	0.004	0.04204	CHRNB4,ATP1A2,CHRM2
P2_I_II_VI	positive regulation of vasodilation	0.0014	14	3	0.004	0.04204	AGTR2,NPPC,CALCA
P2_I_II_VI	sodium ion transport	0.0029	29	4	0.0043	0.04317	SCN3A,SCN1A,ATP1A2,SCN7A
P2_I_II_VI	calcium ion transport	0.0067	68	6	0.0046	0.04394	GRIN3A,TRPC4,ATP2A1,CHRNB2,CACNA1S,SLN
P2_I_II_VI	positive regulation of epithelial cell proliferation	0.0047	48	5	0.0048	0.04447	NOG,SFRP1,DLX5,BMP5,EYA1
P2_I_II_VI	response to wounding	0.0048	49	5	0.0052	0.0508	WNT1,SOX2,PAX6,SLC1A2,NGFR
P2_I_II_VI	cell adhesion	0.0341	346	16	0.0052	0.05143	EPHA3,LAMA2,MYBPC1,CDH15,COL19A1,DSCAM,ACTN2,NCAM1,CNTNAP2,NRXN2,NRXN1,CNTN2,NCAN,CTNND2,CDH4,PRPH2
P2_I_II_VI	adenylate cyclase-inhibiting G-protein coupled receptor signaling pathway	0.0031	31	4	0.0055	0.05558	ADCY2,SSTR2,OPRK1,NPR3
P2_I_II_VI	male genitalia development	0.0016	16	3	0.0058	0.05335	LHCGR,SHH,BMP5
P2_I_II_VI	positive regulation of axonogenesis	0.0016	16	3	0.0058	0.05335	NTRK2,ROBO2,NGFR
P2_I_II_VI	cerebral cortex development	0.0032	32	4	0.0061	0.05371	GRIN2B,NTRK2,ASCL1,CNTNAP2
P2_I_II_VI	synapse assembly	0.0032	32	4	0.0061	0.05371	NLGN1,NLGN3,DRD1,POU4F1
P2_I_II_VI	gamma-aminobutyric acid signaling pathway	0.0017	17	3	0.0068	0.05401	GABRA3,GABRA5,GABRG3
P2_I_II_VI	middle ear morphogenesis	0.0017	17	3	0.0068	0.05401	NOG,SIX2,EYA1
P2_I_II_VI	melanocyte differentiation	0.0017	17	3	0.0068	0.05401	EDN3,CITED1,EDNRB
P2_I_II_VI	positive regulation of branching involved in ureteric bud morphogenesis	0.0017	17	3	0.0068	0.05401	NOG,AGTR2,SOX8
P2_I_II_VI	neuromuscular junction development	0.0017	17	3	0.0068	0.05401	CHRNA1,MUSK,CACNA1S
P2_I_II_VI	positive regulation of transforming growth factor beta receptor signaling pathway	0.0017	17	3	0.0068	0.05401	CITED1,MYOCD,ITGA8
P2_I_II_VI	extracellular matrix organization	0.0074	75	6	0.0072	0.05785	COL14A1,MMP16,MYF5,COL19A1,WNT3A,ITGA8
P2_I_II_VI	phospholipase C-activating G-protein coupled receptor signaling pathway	0.0033	34	4	0.0075	0.06156	LHCGR,EDNRB,OPRK1,NPR3
P2_I_II_VI	osteoblast development	0.0018	18	3	0.008	0.06566	SHH,SATB2,MSX2
P2_I_II_VI	response to cocaine	0.0018	18	3	0.008	0.06566	GRIN2B,CHRNB2,CNR1
P2_I_II_VI	response to retinoic acid	0.0035	36	4	0.0091	0.06553	SHH,WNT8B,DKK1,ASCL1
P2_I_II_VI	cochlea morphogenesis	0.0019	19	3	0.0092	0.06535	HOXA1,EYA1,POU3F4
P2_I_II_VI	response to electrical stimulus	0.0019	19	3	0.0092	0.06535	GRIN2B,MSTN,KCNJ6
P2_I_II_VI	negative regulation of transcription from RNA polymerase II promoter	0.0396	402	17	0.0095	0.06656	NOG,FST,SHH,PITX2,NKX2-1,DLX2,TP63,EDNRB,FOXC2,DKK1,PTCH1,SATB2,SOX3,SOX2,POU4F1,MSX2,POU3F3
P2_I_II_VI	ureteric bud development	0.0036	37	4	0.01	0.07259	SMAD9,SFRP1,FOXC2,ROBO2
P2_I_II_VI	face morphogenesis	0.002	20	3	0.0106	0.07721	NOG,DLX5,DKK1
P2_I_II_VI	membrane depolarization	0.002	20	3	0.0106	0.07721	CACNB4,CHRNB2,CACNA1E
P2_I_II_VI	positive regulation of neuron apoptotic process	0.0037	38	4	0.0109	0.07723	CDK5R1,MUSK,EPHA7,ASCL1
P2_I_II_VI	positive regulation of neuron projection development	0.0037	38	4	0.0109	0.07723	EPHA3,NTRK2,CNR1,DCC
P2_I_II_VI	negative regulation of cell migration	0.0058	59	5	0.011	0.07325	NOG,SHH,NKX2-1,SFRP1,DRD1
P2_I_II_VI	positive regulation of canonical Wnt receptor signaling pathway	0.0038	39	4	0.0119	0.0751	SFRP1,DLX5,WNT3A,RSPO2
P2_I_II_VI	negative regulation of blood pressure	0.0021	21	3	0.0121	0.07517	UTS2R,CNR1,CALCA
P2_I_II_VI	negative regulation of neuron differentiation	0.0039	40	4	0.013	0.08164	ASCL1,SOX3,SOX2,CNTN2
P2_I_II_VI	cellular response to retinoic acid	0.0039	40	4	0.013	0.08164	EPHA3,WNT8B,FZD7,WNT3A
P2_I_II_VI	positive regulation of cell proliferation	0.0315	320	14	0.0137	0.08544	EDN3,SHH,SFRP1,NTRK2,FGF8,GLI1,FGF19,WNT3A,WNT1,MYOCD,GLP2R,GLP1R,POU3F3,POU3F2
P2_I_II_VI	inner ear morphogenesis	0.004	41	4	0.0141	0.08634	DLX5,WNT3A,WNT1,ITGA8
P2_I_II_VI	positive regulation of sequence-specific DNA binding transcription factor activity	0.0063	64	5	0.0152	0.08578	WNT3A,ZIC2,WNT1,BEX1,NEUROG2
P2_I_II_VI	heterophilic cell-cell adhesion	0.0023	23	3	0.0153	0.08553	NLGN1,CDH4,PTPRD
P2_I_II_VI	response to amphetamine	0.0023	23	3	0.0153	0.08553	GRIN2B,DRD1,DCC
P2_I_II_VI	adult walking behavior	0.0023	23	3	0.0153	0.08553	SCN1A,DRD1,CNTN2
P2_I_II_VI	ion transport	0.0064	65	5	0.0161	0.0914	SLC32A1,CHRNB4,CHRNB2,SLC8A3,SLC1A2
P2_I_II_VI	neural tube closure	0.0042	43	4	0.0165	0.09348	NOG,SFRP1,PTCH1,ZIC2
P2_I_II_VI	embryonic hindlimb morphogenesis	0.0024	24	3	0.0172	0.09604	SHH,RSPO2,MSX2
P2_I_II_VI	odontogenesis of dentin-containing tooth	0.0043	44	4	0.0177	0.09471	FST,SHH,DLX2,TP63
P2_I_II_VI	cell-cell adhesion	0.0066	67	5	0.0181	0.09502	COL14A1,COL19A1,ITGA8,JAM2,CDH7
P2_I_II_VI	T cell differentiation in thymus	0.0025	25	3	0.0191	0.09874	SHH,FZD7,WNT1
P2_I_II_VI	inner ear development	0.0025	25	3	0.0191	0.09874	SHH,SOX2,HOXA1
P2_I_II_VI	cell fate commitment	0.0025	25	3	0.0191	0.09874	SOX8,NEUROG2,EYA1
P2_I_II_VI	positive regulation of muscle cell differentiation	0.0025	25	3	0.0191	0.09874	MYF5,CDH15,MYOD1
P2_I_II_VI	cardiac muscle contraction	0.0025	25	3	0.0191	0.09874	ACTC1,MYL4,MYL1
P2_V_VII	epidermis development	0.0057	58	8	0	0.0002	KRT17,KRT16,KRT14,LAMC2,ELF3,SPRR2A,POU2F3,KLK7
P2_V_VII	interferon-gamma-mediated signaling pathway	0.0057	58	8	0	0.0002	SOCS3,HLA-DQA2,GBP2,HLA-DRA,GBP1,HLA-DOB,ICAM1,MT2A
P2_V_VII	lipoprotein metabolic process	0.0032	33	6	0	0.0008182	APOA4,APOA1,APOC2,ALB,APOC3,APOL1
P2_V_VII	extracellular matrix organization	0.0074	75	8	0	0.0015	MMP7,MMP3,MMP1,ELF3,MMP11,TNF,PRSS1,BCL3
P2_V_VII	phospholipid efflux	0.001	10	4	0	0.001385	APOA4,APOA1,APOC2,APOC3
P2_V_VII	collagen catabolic process	0.0021	21	5	0	0.001286	MMP7,MMP3,MMP1,MMP11,KLK6
P2_V_VII	cellular response to cadmium ion	0.0011	11	4	0	0.001333	MT1E,MT1H,MT1G,MT1F
P2_V_VII	proteolysis	0.0289	294	15	0	0.001313	MMP7,MMP3,MMP1,CFI,CFB,FBXO2,PLAU,LTF,KLK10,MMP11,CTSE,PRSS1,C2,KLK6,KLK7
P2_V_VII	innate immune response	0.0406	412	18	0	0.001353	F2RL1,CFI,IGKV1-5,IGKV4-1,IL23A,IGKC,CFB,IGHG1,IGHG2,IGHG3,IGHG4,IGLC7,IL18RAP,C3,C2,IGLC2,IGLC1,IGLC3
P2_V_VII	post-translational protein modification	0.0136	138	10	0	0.001722	B3GNT3,MUC1,MUC2,MUC5AC,MUC5B,ST6GALNAC2,GALNT3,GALNT6,MUC20,MUC16
P2_V_VII	regulation of immune response	0.0198	201	12	0	0.001684	TRAC,CD3G,CD3E,IGKV1-5,IGKV4-1,IGKC,IGLC7,ICAM1,C3,IGLC2,IGLC1,IGLC3
P2_V_VII	regulation of complement activation	0.0013	13	4	0	0.0018	CFI,CFB,C3,C2
P2_V_VII	extracellular matrix disassembly	0.0027	27	5	0.0001	0.001952	MMP7,MMP3,MMP1,MMP11,PRSS1
P2_V_VII	T cell costimulation	0.0069	70	7	0.0001	0.002818	TRAC,CD3G,CD3E,HLA-DQA2,HLA-DRA,HLA-DOB,CCL19
P2_V_VII	reverse cholesterol transport	0.0016	16	4	0.0001	0.003	APOA4,APOA1,APOC2,APOC3
P2_V_VII	cholesterol efflux	0.0018	18	4	0.0001	0.004625	APOA4,APOA1,APOC2,APOC3
P2_V_VII	response to estradiol stimulus	0.0079	80	7	0.0002	0.00564	MMP3,SOCS3,SLC34A2,VDR,TFF1,SERPINA1,ESR1
P2_V_VII	positive regulation of nitric oxide biosynthetic process	0.0026	26	4	0.0006	0.02474	ICAM1,ESR1,TNF,IL6
P2_V_VII	negative regulation of protein kinase activity	0.005	51	5	0.0009	0.03237	SOCS3,EPHA1,GADD45B,SFN,IL6
P2_V_VII	antigen processing and presentation of peptide or polysaccharide antigen via MHC class II	0.0013	13	3	0.0009	0.02994	HLA-DQA2,HLA-DRA,HLA-DOB
P2_V_VII	defense response to Gram-negative bacterium	0.0013	13	3	0.0009	0.02994	MMP7,IL23A,IL6
P2_V_VII	negative regulation of lipid catabolic process	0.0013	13	3	0.0009	0.02994	APOC3,CIDEA,TNF
P2_V_VII	high-density lipoprotein particle remodeling	0.0013	13	3	0.0009	0.02994	APOA4,APOA1,APOC3
P2_V_VII	positive regulation of interferon-gamma production	0.003	30	4	0.001	0.03809	CD3E,IL23A,TNF,BCL3
P2_V_VII	cell surface receptor signaling pathway	0.0138	140	8	0.001	0.03928	CD3G,CD3E,EPHA1,CBLC,IL18RAP,IL7R,CD2,BIRC3
P2_V_VII	positive regulation of chemokine production	0.0014	14	3	0.0011	0.04032	P2RY2,TNF,IL6
P2_V_VII	triglyceride homeostasis	0.0014	14	3	0.0011	0.04032	APOA1,APOC2,APOC3
P2_V_VII	T cell receptor signaling pathway	0.0082	83	6	0.0014	0.04241	TRAC,CD3G,CD3E,HLA-DQA2,HLA-DRA,HLA-DOB
P2_V_VII	positive regulation of neutrophil chemotaxis	0.0015	15	3	0.0014	0.04195	IL23A,IL8,CCL19
P2_V_VII	cell adhesion	0.0341	346	13	0.0016	0.04398	CCR8,LAMC2,CCL4,ITGAX,MUC5AC,MUC5B,ICAM1,CD9,COMP,COL8A1,THBS2,CCL11,MUC16
P2_V_VII	positive regulation of NF-kappaB import into nucleus	0.0017	17	3	0.002	0.05208	IL23A,TNF,CCL19
P2_V_VII	T cell activation	0.0036	37	4	0.0021	0.05109	CD3G,CD3E,CD2,IL6
P2_V_VII	digestion	0.0036	37	4	0.0021	0.05109	TFF1,MUC5AC,CTSE,PRSS1
P2_V_VII	positive regulation of T cell proliferation	0.0037	38	4	0.0023	0.05218	CD3E,IL23A,IL6,CCL19
P2_V_VII	cytokine-mediated signaling pathway	0.0199	202	9	0.0027	0.06152	SOCS3,HLA-DQA2,GBP2,HLA-DRA,GBP1,HLA-DOB,ICAM1,IL6,MT2A
P2_V_VII	lipid metabolic process	0.0097	99	6	0.0033	0.06529	APOA4,APOA1,APOC2,ALB,APOC3,CIDEA
P2_V_VII	cell-cell signaling	0.0209	212	9	0.0038	0.07018	CXCL11,PGR,CCL4,CCL7,NFE2,TNFSF10,LTB,CXCL9,CCL20
P2_V_VII	leukocyte migration	0.01	102	6	0.0038	0.06919	F2RL1,MMP1,ITGAX,ITGA3,ICAM1,CD2
P2_V_VII	response to virus	0.0137	139	7	0.0042	0.0752	CCL4,IL23A,FOSL1,TNF,BCL3,CCL19,CCL11
P2_V_VII	cholesterol metabolic process	0.0044	45	4	0.0043	0.07434	APOA4,APOA1,NR0B2,APOC3
P2_V_VII	positive regulation of ERK1 and ERK2 cascade	0.0073	74	5	0.0045	0.07524	F2RL1,ESR1,TNF,IL6,CCL19
P2_V_VII	response to cytokine stimulus	0.0045	46	4	0.0046	0.07493	SERPINE1,CXCL16,SERPINA1,FOSL1
P2_V_VII	chemokine-mediated signaling pathway	0.0023	23	3	0.0046	0.07415	CCR8,CCR4,CCBP2
P2_V_VII	positive regulation of tyrosine phosphorylation of Stat3 protein	0.0024	24	3	0.0052	0.07836	LIF,IL23A,IL6
P2_V_VII	organ morphogenesis	0.0076	77	5	0.0054	0.07946	VDR,ITGAX,BHLHE41,TNF,COMP
P2_V_VII	cholesterol homeostasis	0.0048	49	4	0.0057	0.08121	APOA4,APOA1,APOC2,APOC3
P2_V_VII	cellular calcium ion homeostasis	0.0051	52	4	0.007	0.09455	CCL7,VDR,CCL19,CCL11
P2_V_VII	defense response to virus	0.0051	52	4	0.007	0.09455	F2RL1,ITGAX,CXCL9,IL6
P2_V_VII	cytoskeleton organization	0.0082	83	5	0.0073	0.09496	KRT16,CCL7,KRT7,KRT8,CCL11
P2_V_VII	cellular response to interleukin-1	0.0028	28	3	0.0079	0.09916	P2RY2,ICAM1,IL8
P2_V_VII	response to organic cyclic compound	0.0084	85	5	0.008	0.09821	SOCS3,SERPINA1,FOSL1,ICAM1,CCL19
